# Supplementary material for: Broadening the reaction scope of unprotected aldosesviatheir corresponding nitrones: 1,3-dipolar cycloadditions with alkenes
Source: Royal Society of Chemistry journal article supplement (doi:10.1039/d0ob01350a), 2020-01-01
Supplement: d0ob01350a1.pdf [file d0ob01350a1.pdf]

## Electronic Supplementary Material

### **Broadening the reaction scope of unprotected aldoses via their corresponding nitrones: 1,3-dipolar cycloadditions with alkenes.**

Gatien Messire,<sup>a</sup> Fabien Massicot,<sup>a</sup> Laura Pascual,<sup>a</sup> Emmanuel Riguet,<sup>a</sup> Jean-Luc Vasse<sup>a</sup> and Jean-Bernard Behr<sup>\*a</sup>

---

<sup>a</sup> Univ. Reims Champagne-Ardenne, ICMR, CNRS UMR 7312, FR Condorcet CNRS 3417, 51687 Reims Cedex 2, France.  
E-mail: [jb.behr@univ-reims.fr](mailto:jb.behr@univ-reims.fr)

## Table of Contents

|                                                                                                                    |              |
|--------------------------------------------------------------------------------------------------------------------|--------------|
| <b><math>^1\text{H}</math>, <math>^{13}\text{C}</math> NMR spectra of sugar-nitrones 4a-e, 5a-c, 6a and 7a</b>     | <b>p S3</b>  |
| <b><math>^1\text{H}</math>, <math>^{13}\text{C}</math> NMR spectra of isoxazolidines 10, 10', 10'', 14-29</b>      | <b>p S23</b> |
| <b><math>^1\text{H}</math>, <math>^{13}\text{C}</math> NMR spectra of dihydroxymethyl-isoxazolidines 11 and 12</b> | <b>p S65</b> |
| <b>Hydrogenation of compounds 10, 10' and 10'' for chemical correlation</b>                                        | <b>p S69</b> |
| <b>Procedure for glycosidase inhibition assays</b>                                                                 | <b>p S76</b> |

<sup>1</sup>H-NMR spectrum of 4a (CD<sub>3</sub>OD)

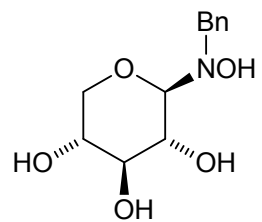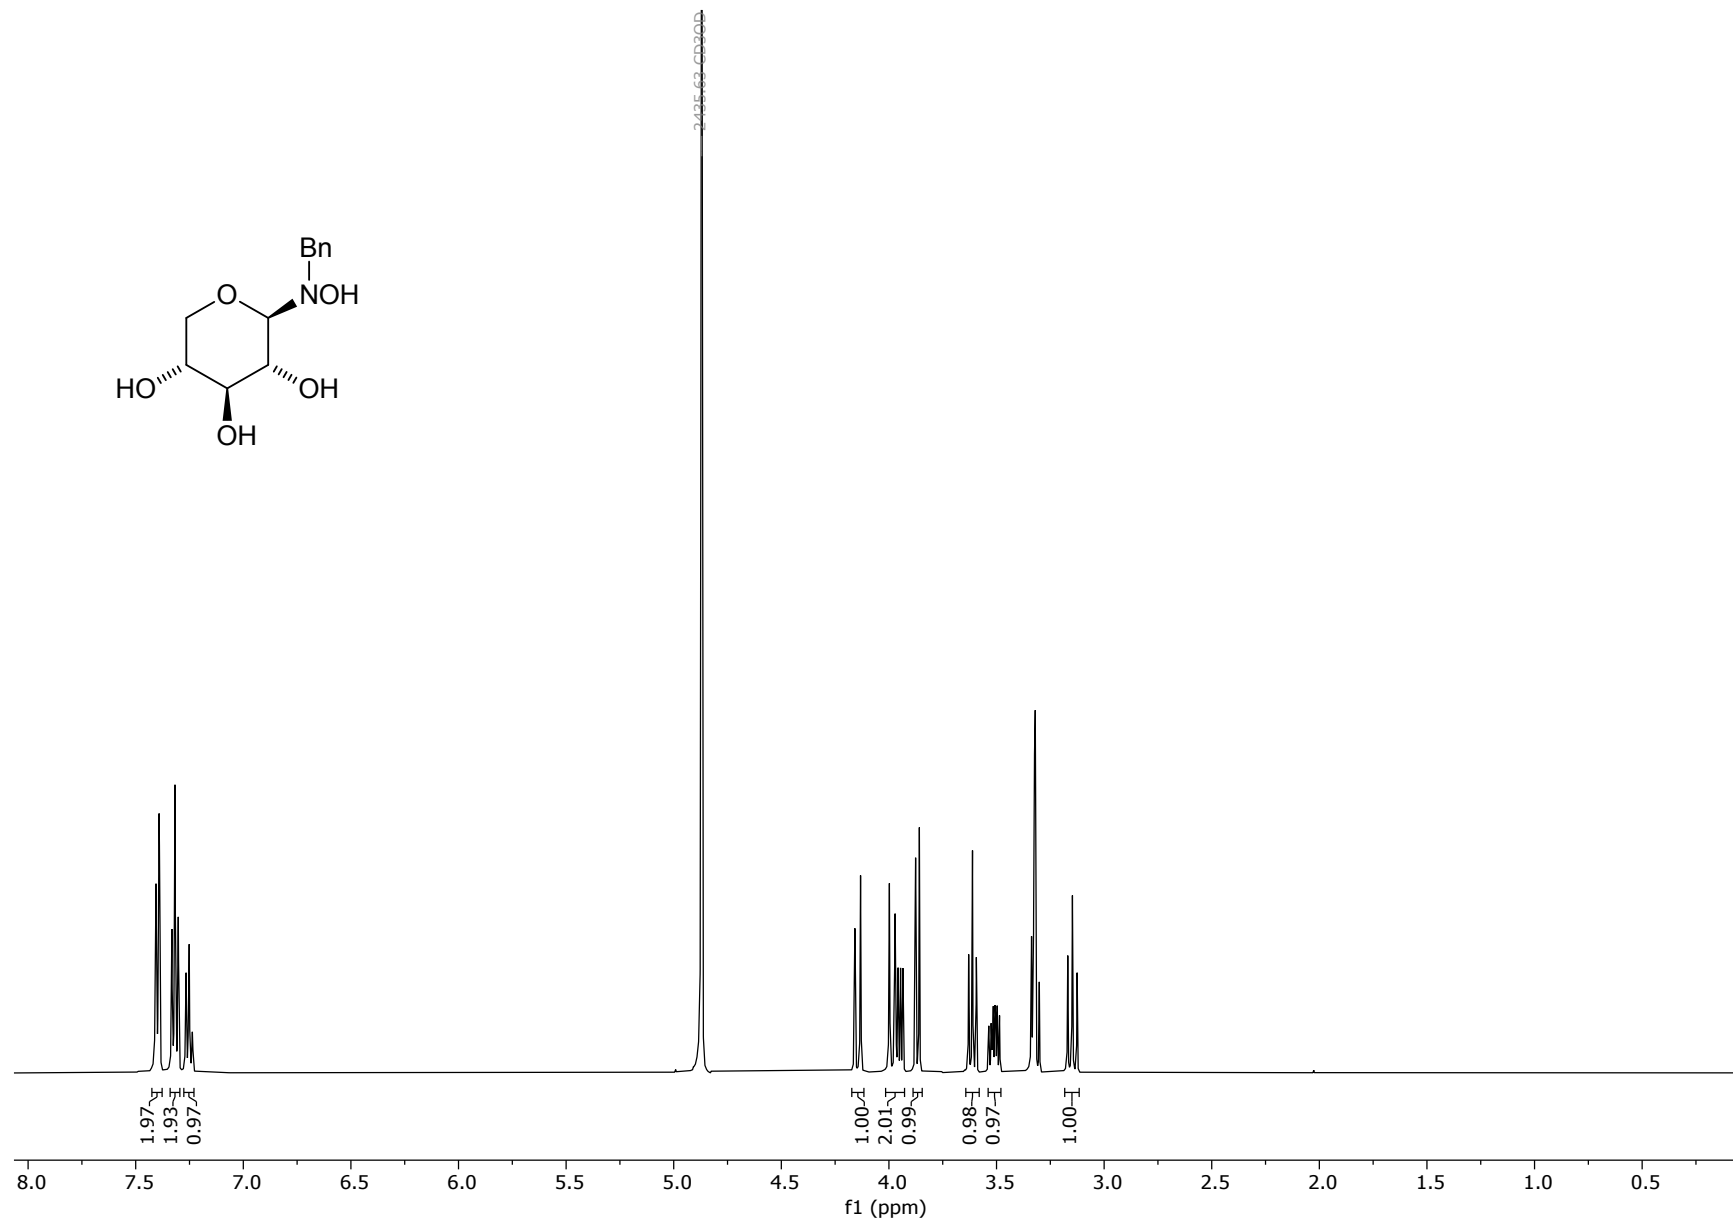

<sup>13</sup>C-NMR spectrum of 4a (CD<sub>3</sub>OD)

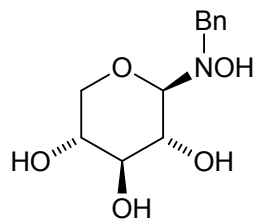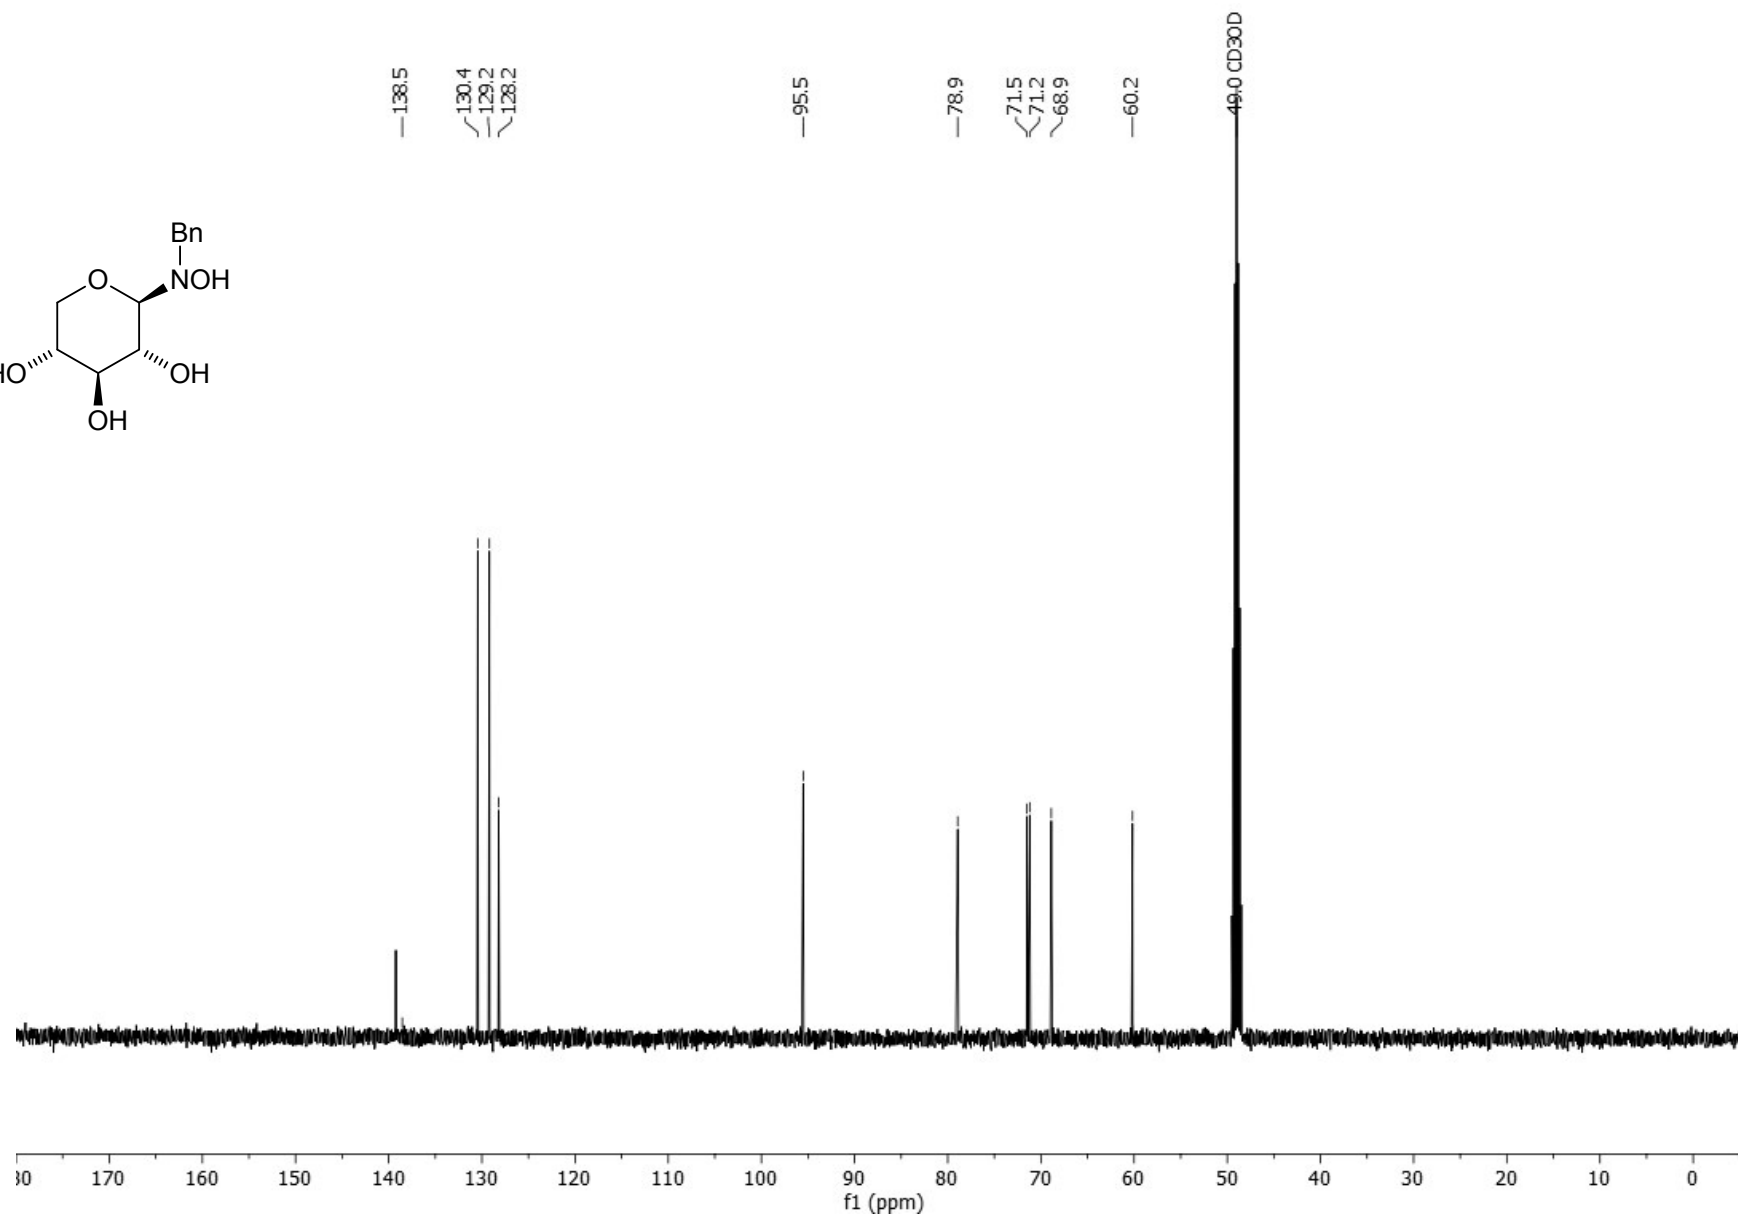

<sup>1</sup>H-NMR spectrum of 4b (CD<sub>3</sub>OD)

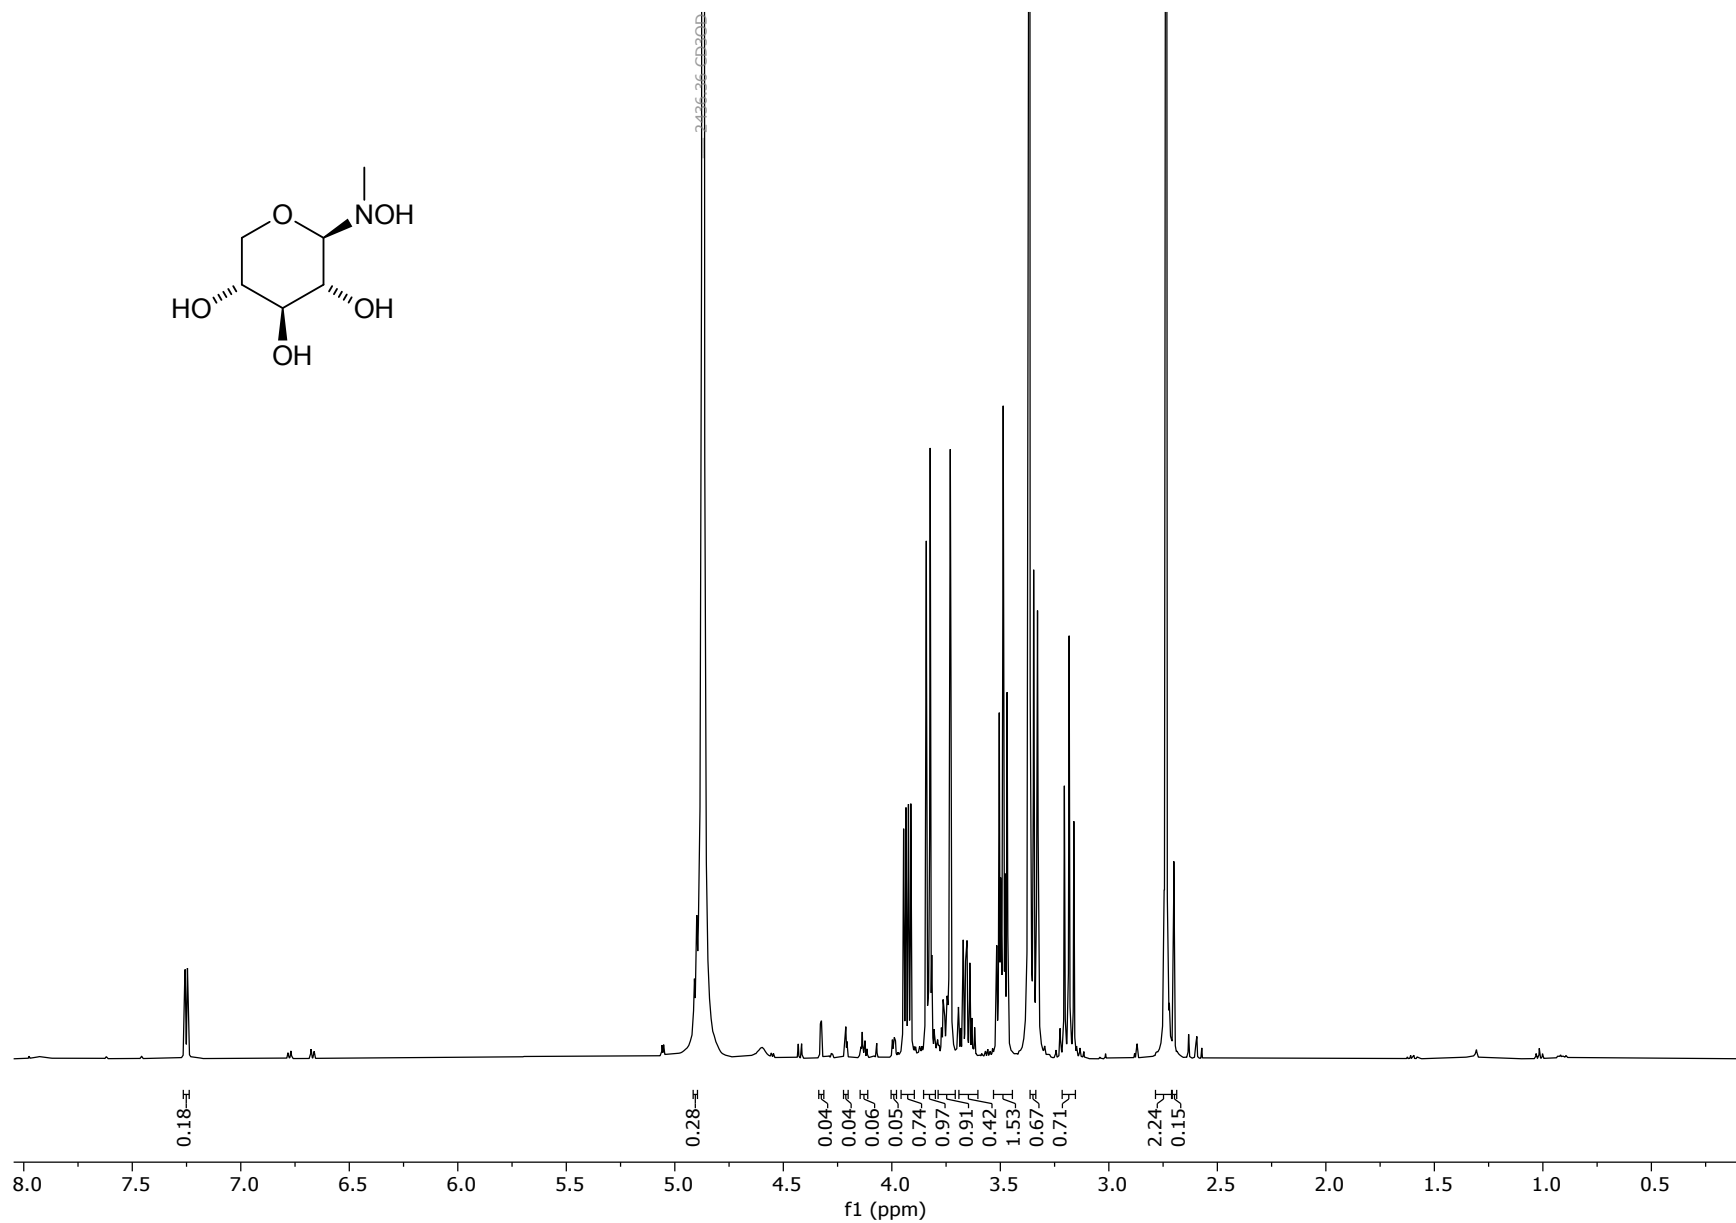

<sup>13</sup>C-NMR spectrum of 4b (CD<sub>3</sub>OD)

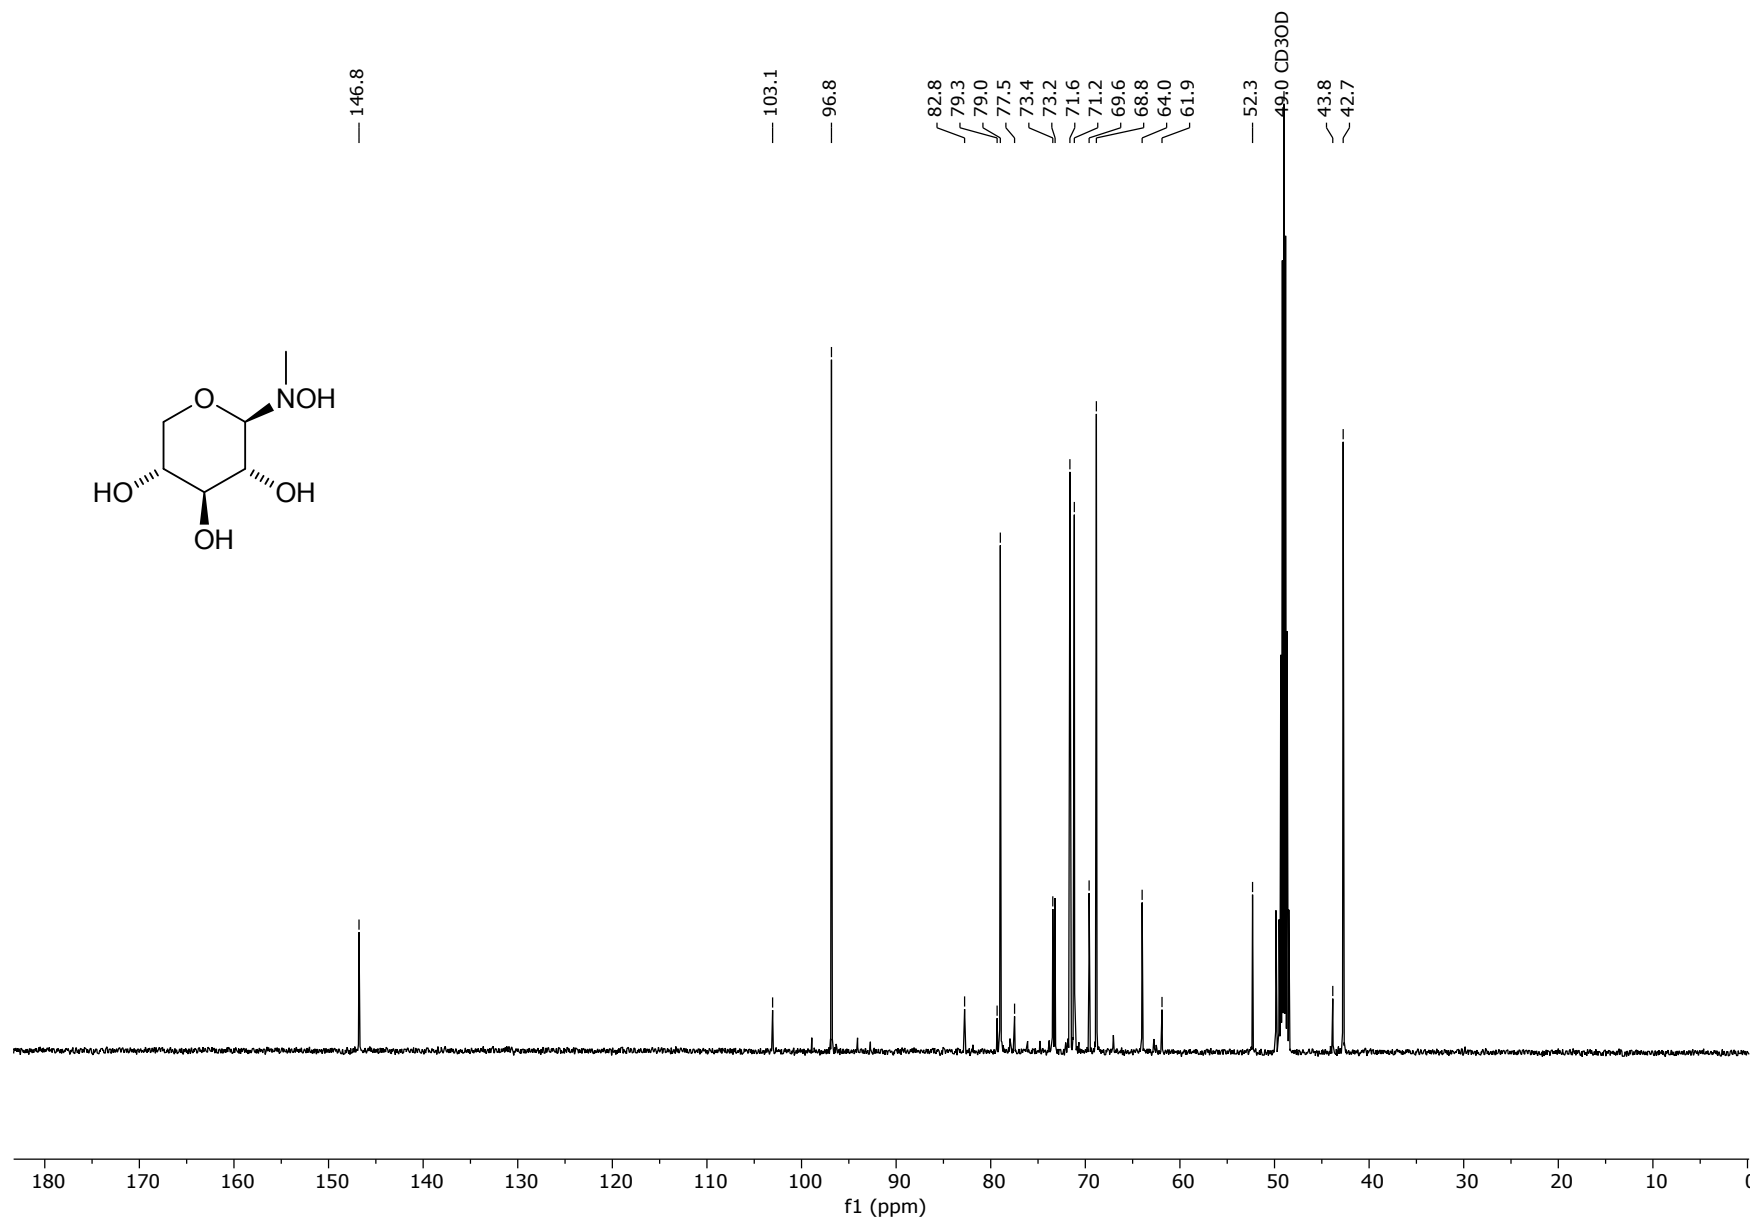

<sup>1</sup>H-NMR spectrum of 4c (CD<sub>3</sub>OD)

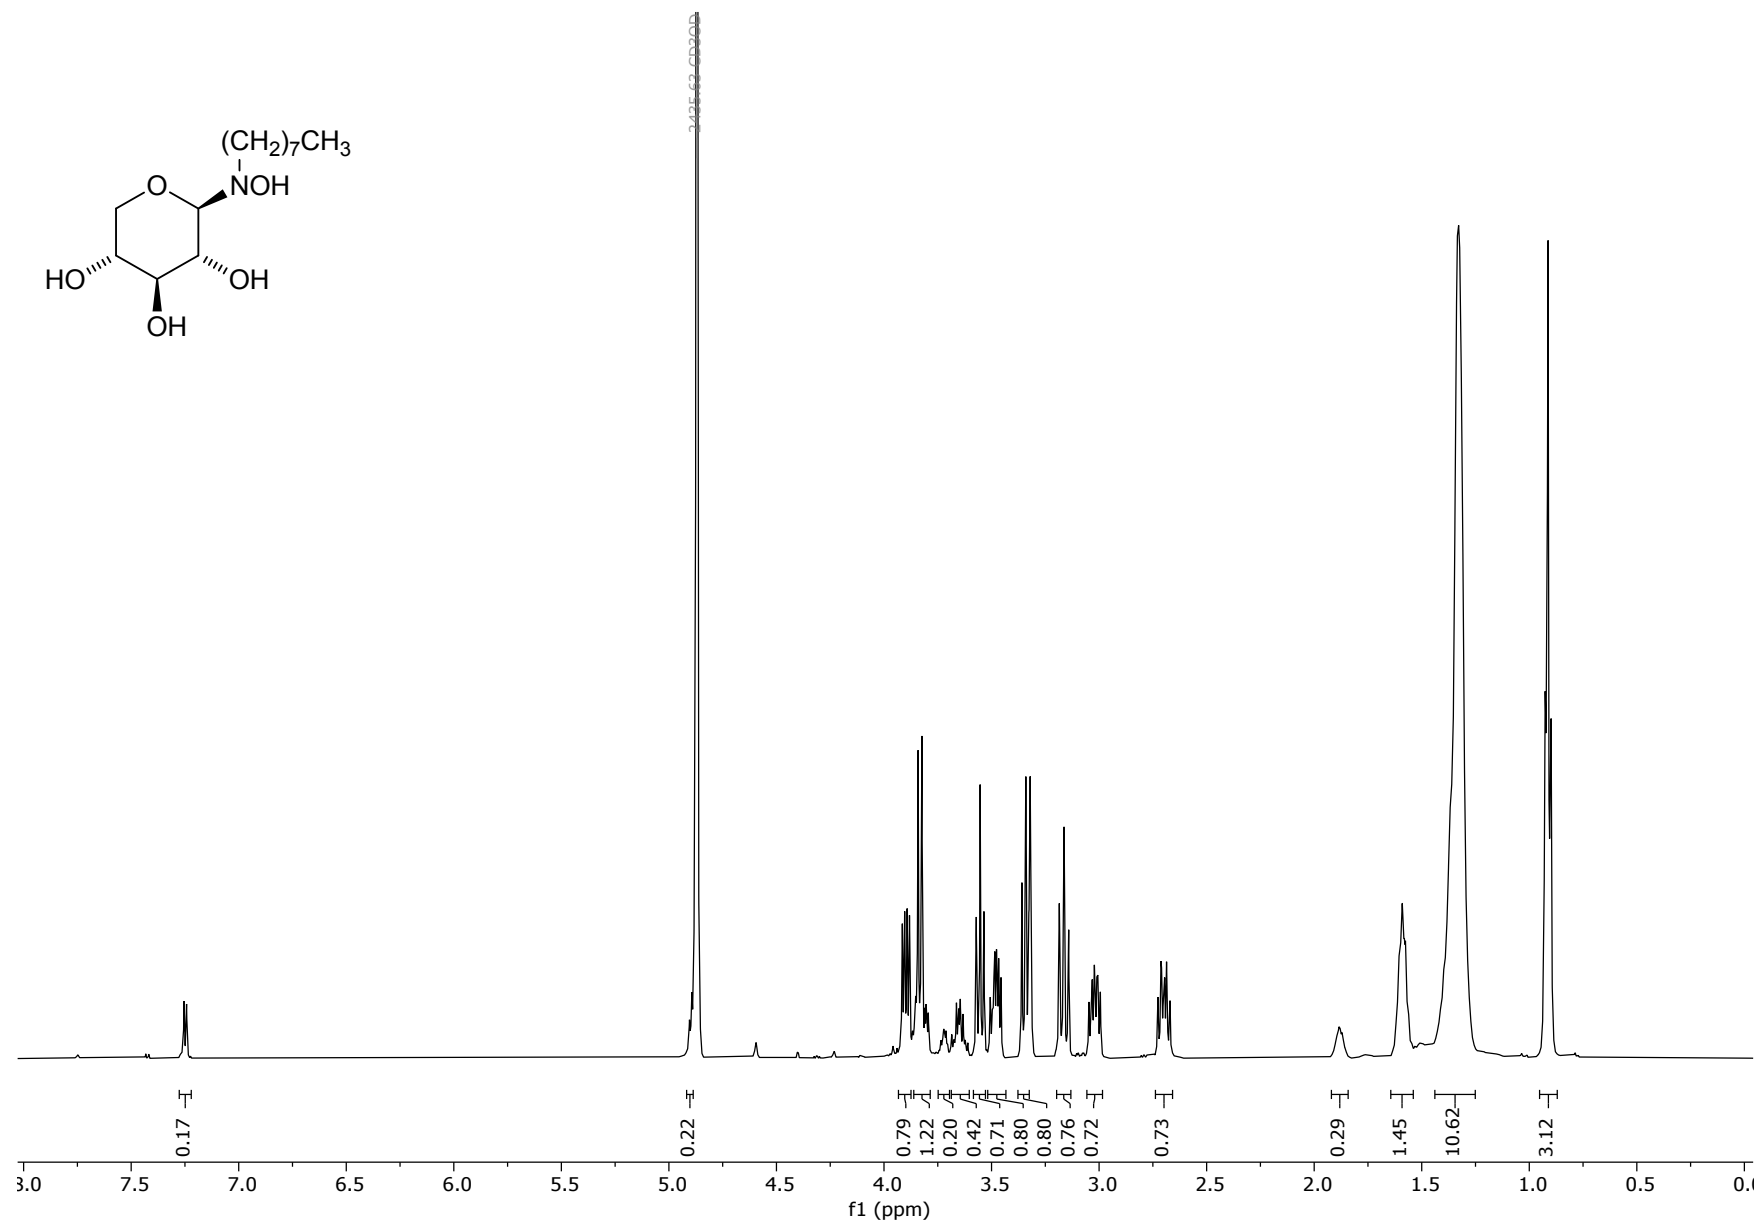

<sup>13</sup>C-NMR spectrum of 4c (CD<sub>3</sub>OD)

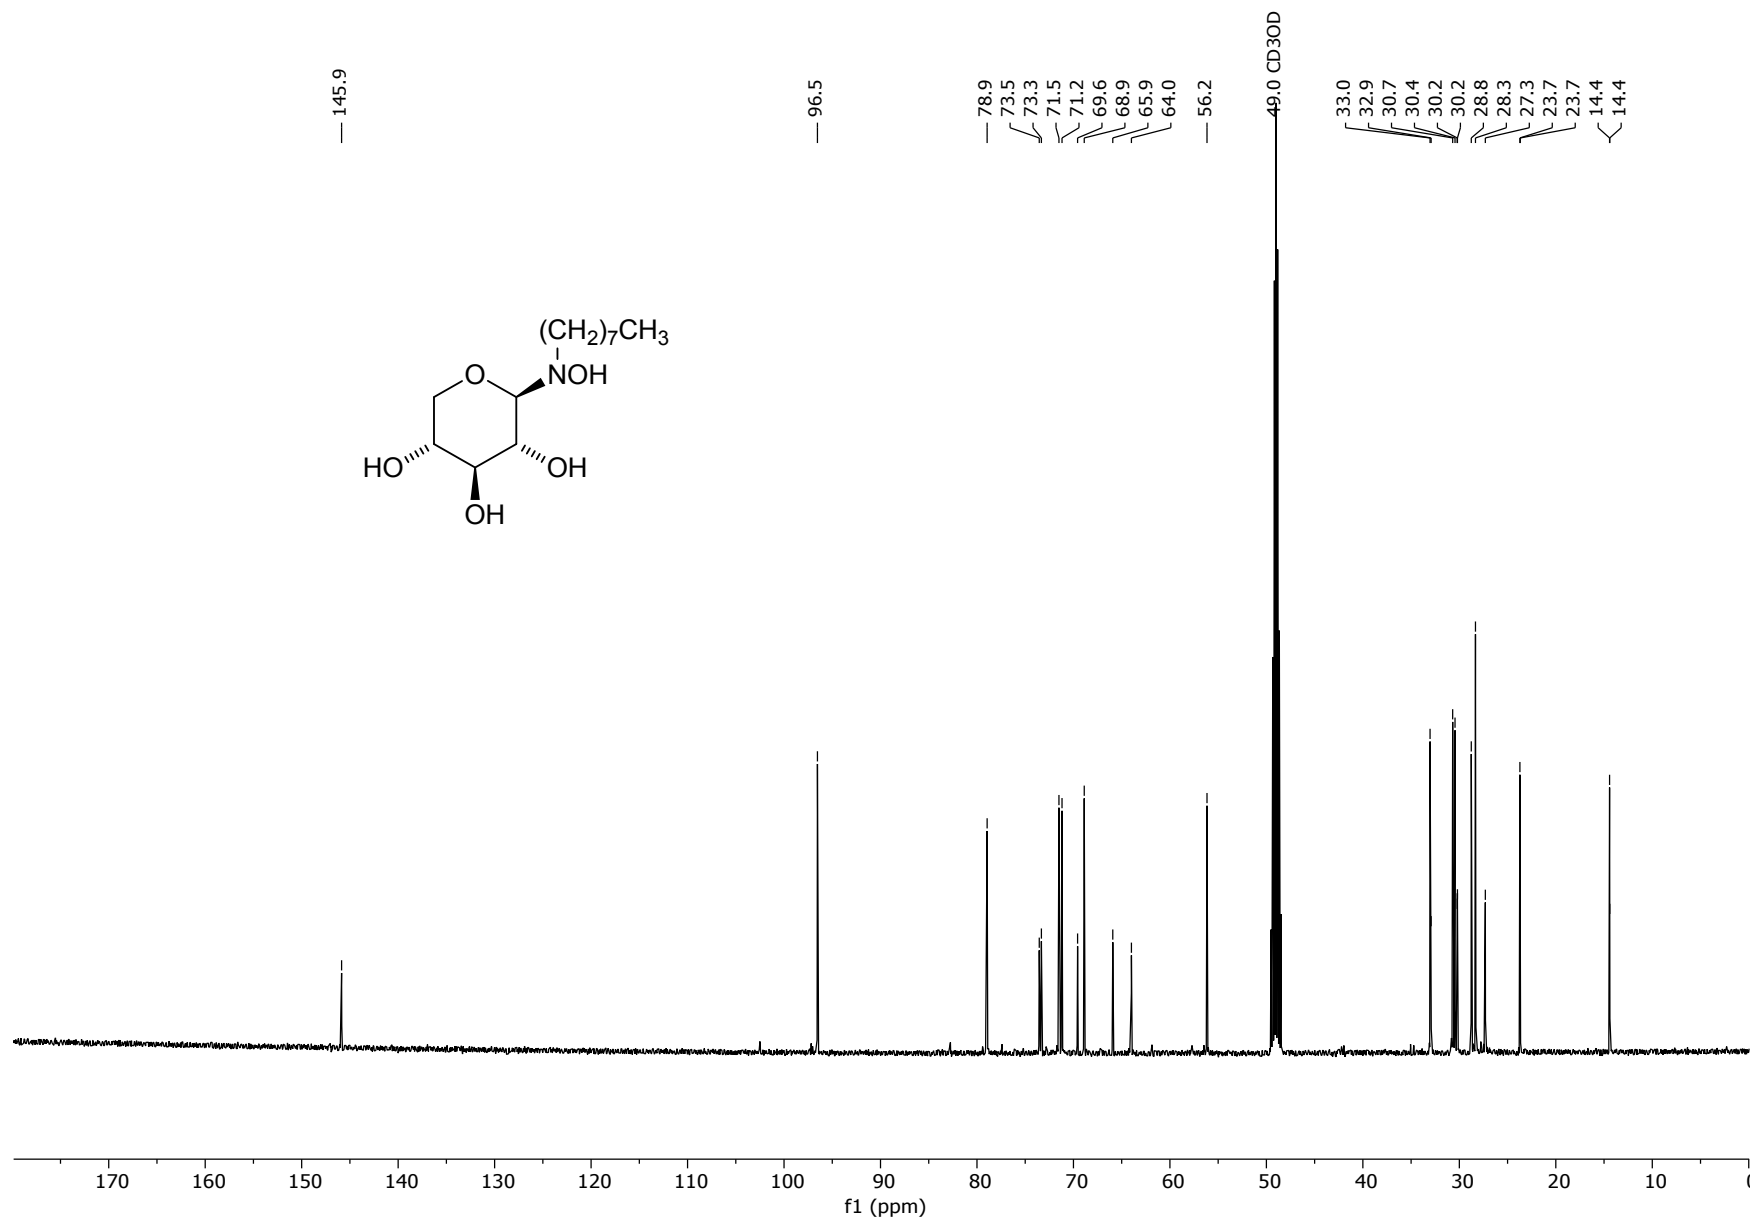



<sup>1</sup>H-NMR spectrum of 4d (CD<sub>3</sub>OD)

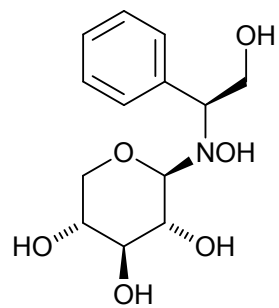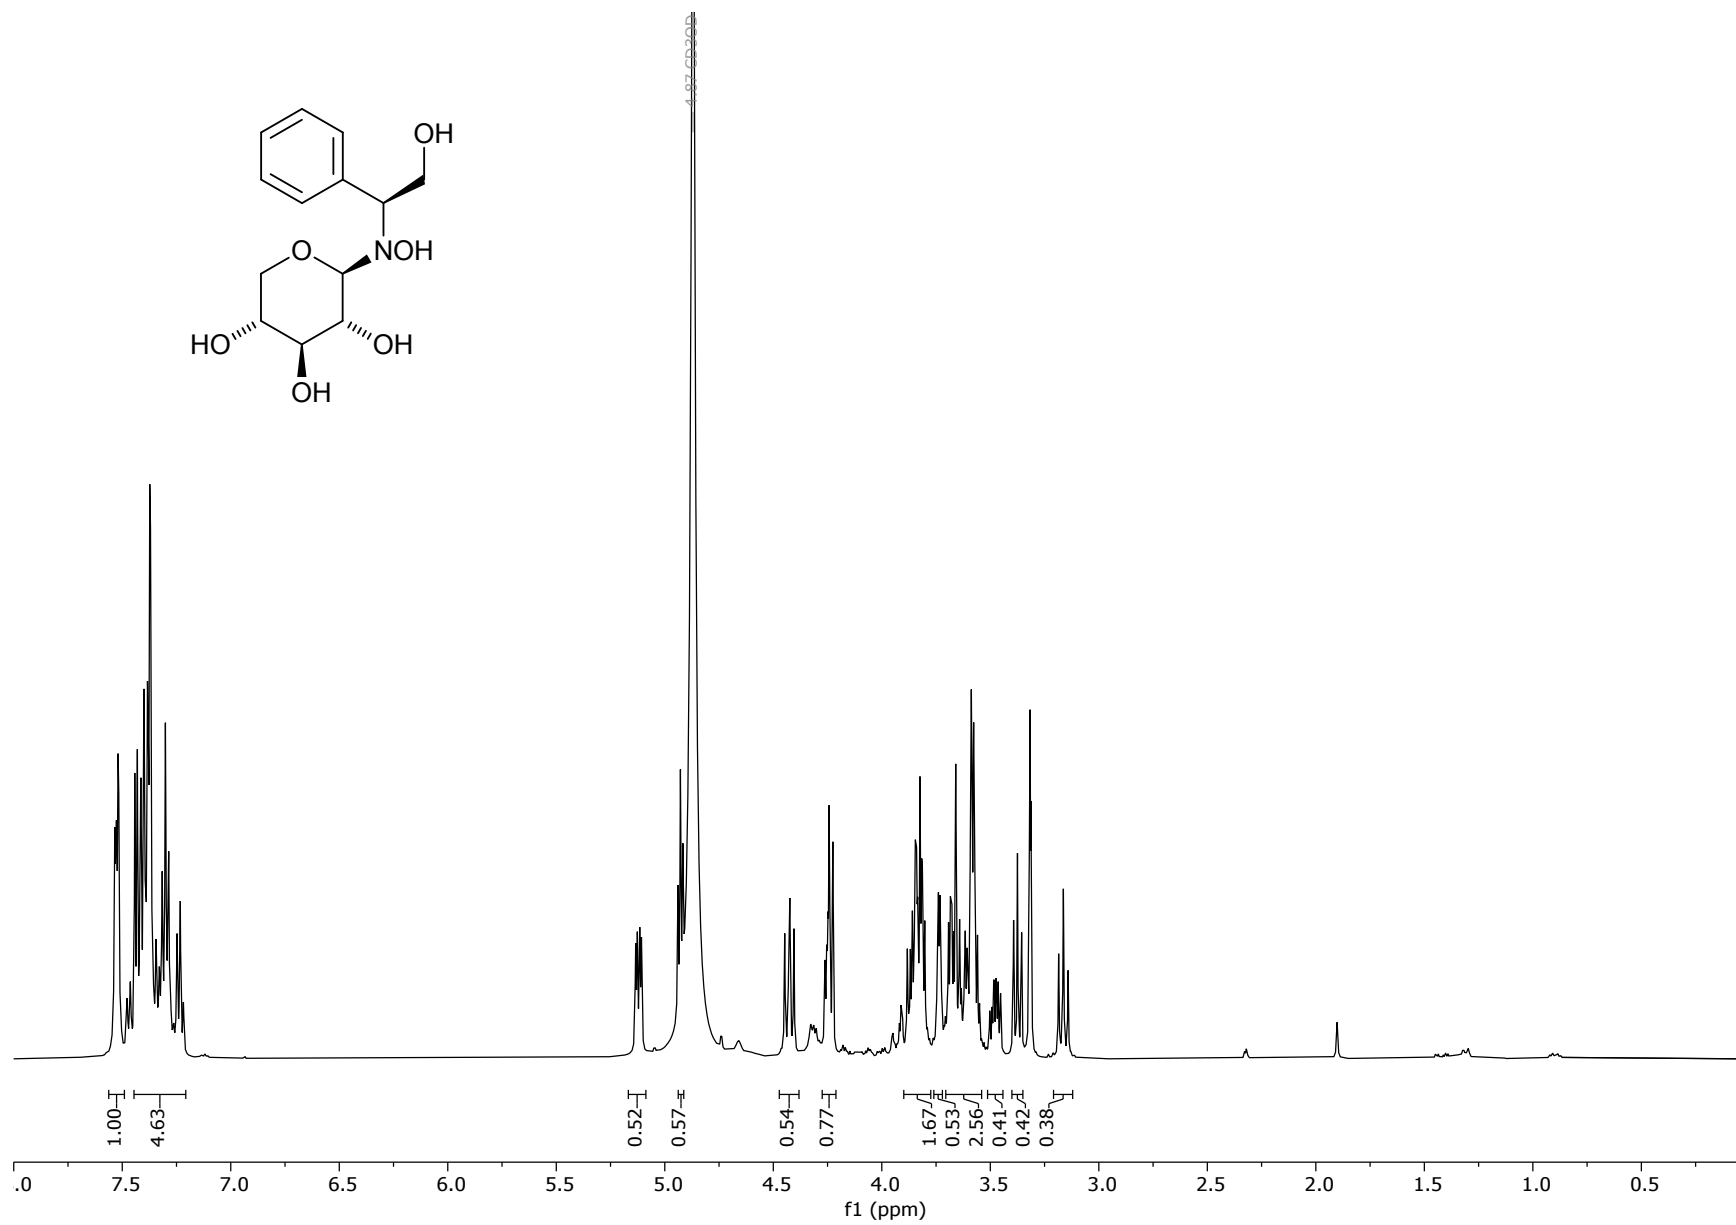

<sup>13</sup>C-NMR spectrum of 4d (CD<sub>3</sub>OD)

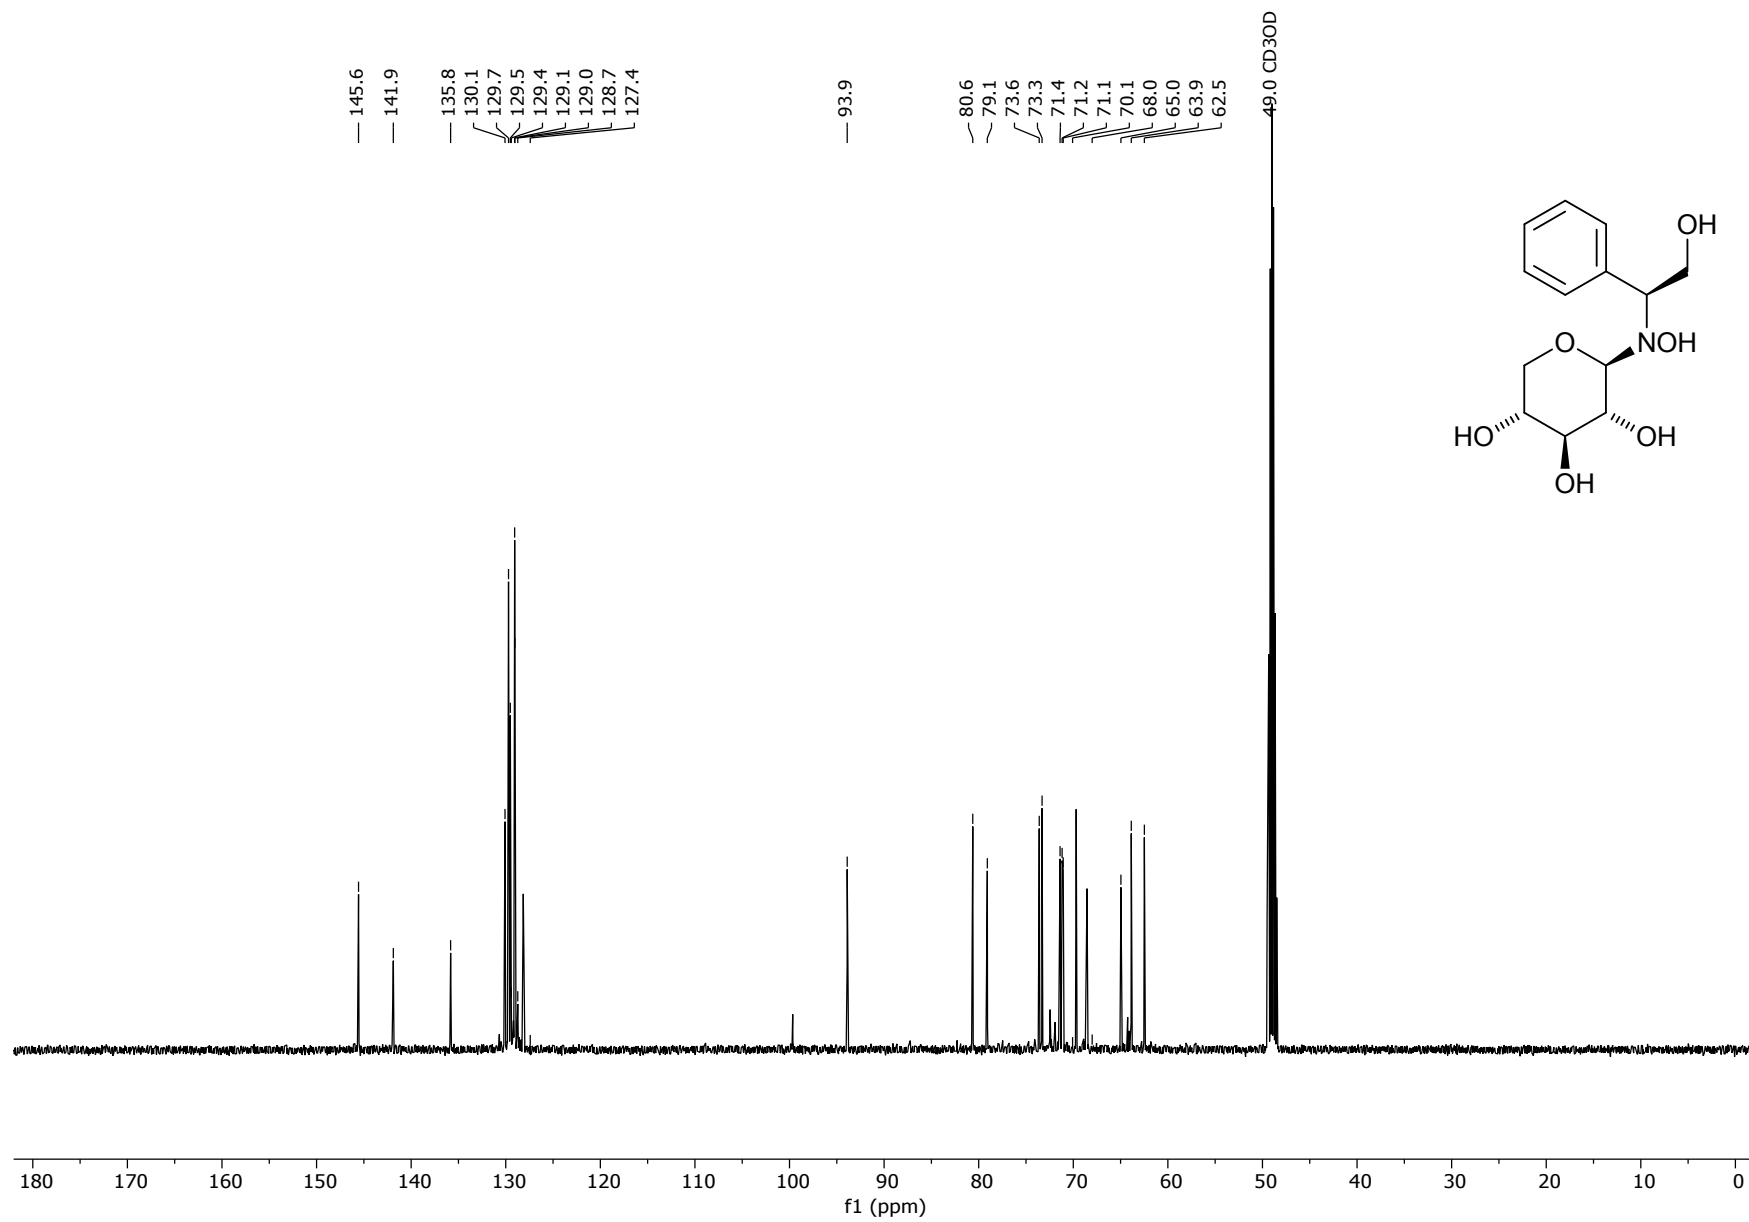

<sup>1</sup>H-NMR spectrum of 4e (CD<sub>3</sub>OD)

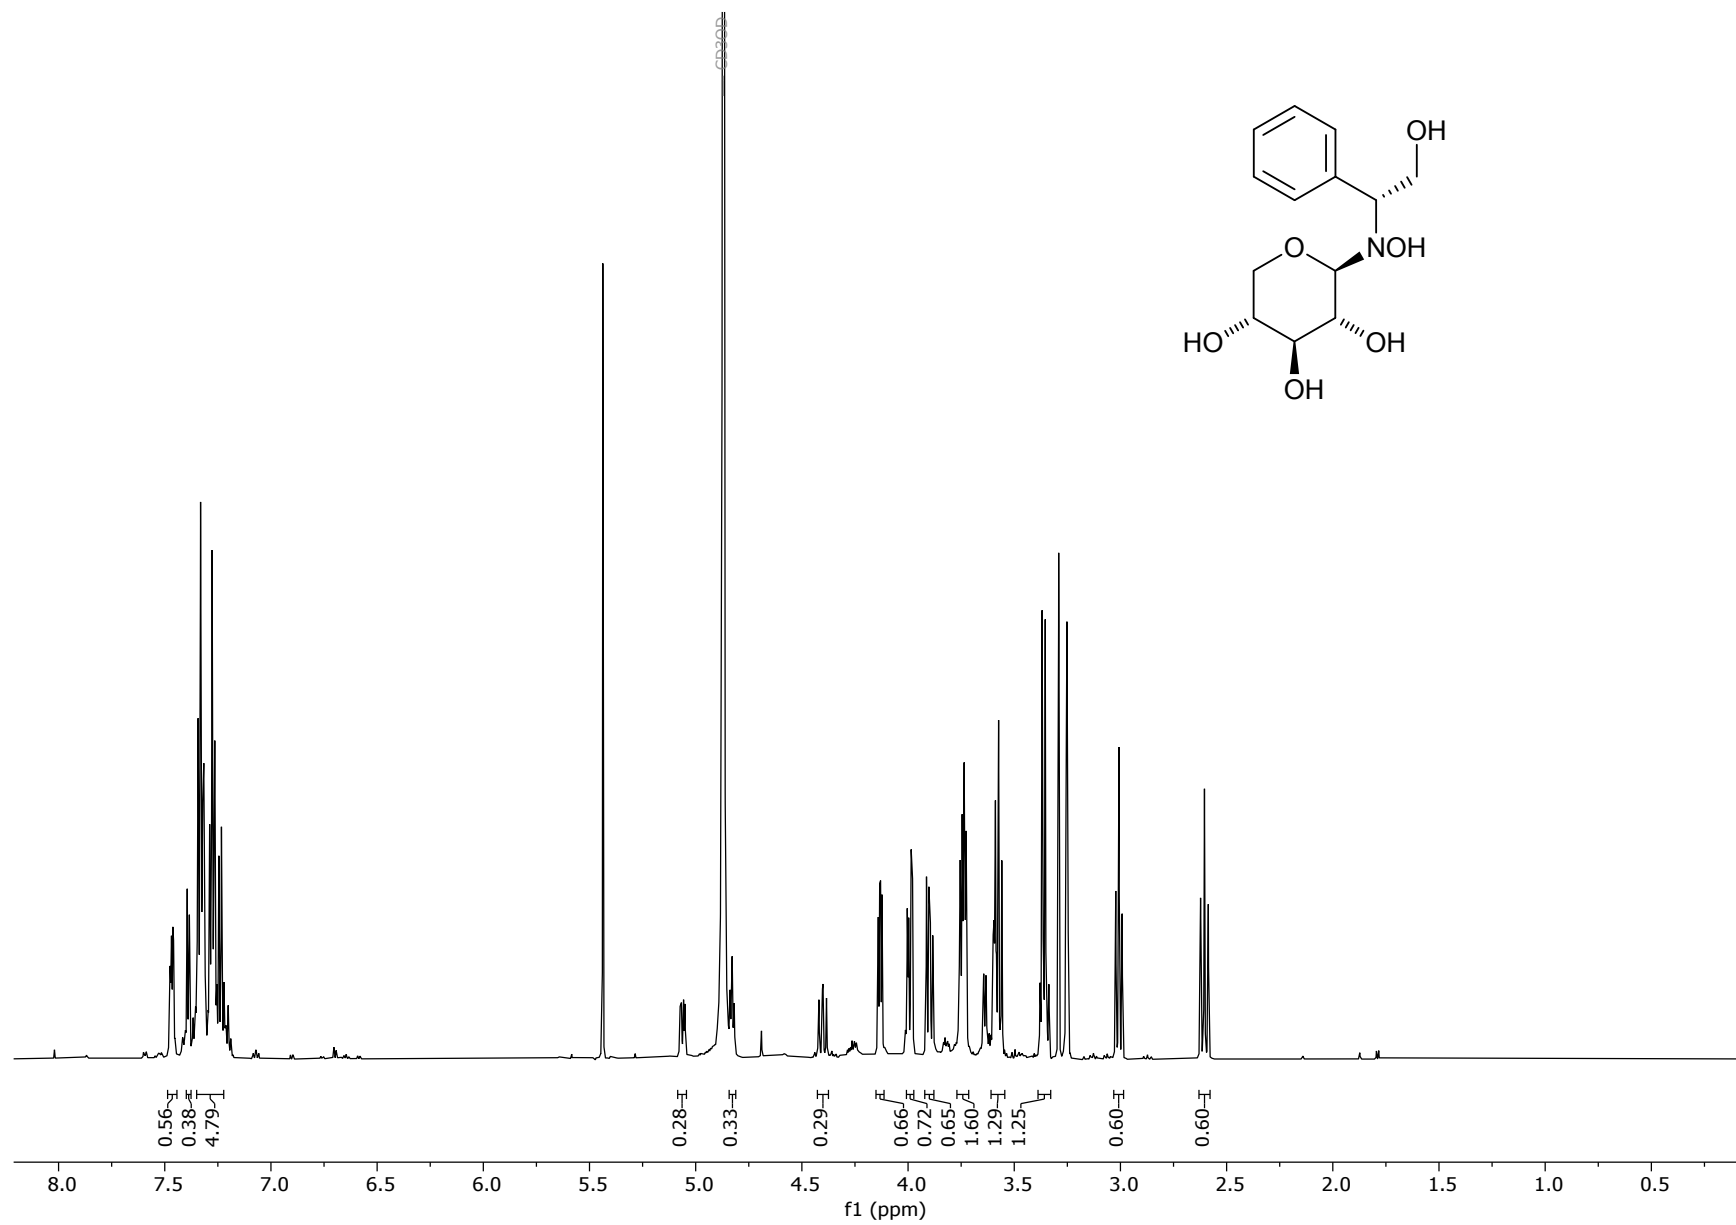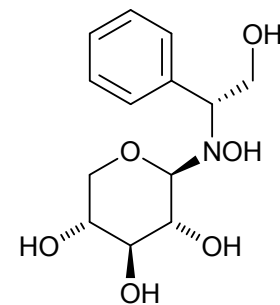

<sup>13</sup>C-NMR spectrum (J-MOD) of 4e (CD<sub>3</sub>OD)

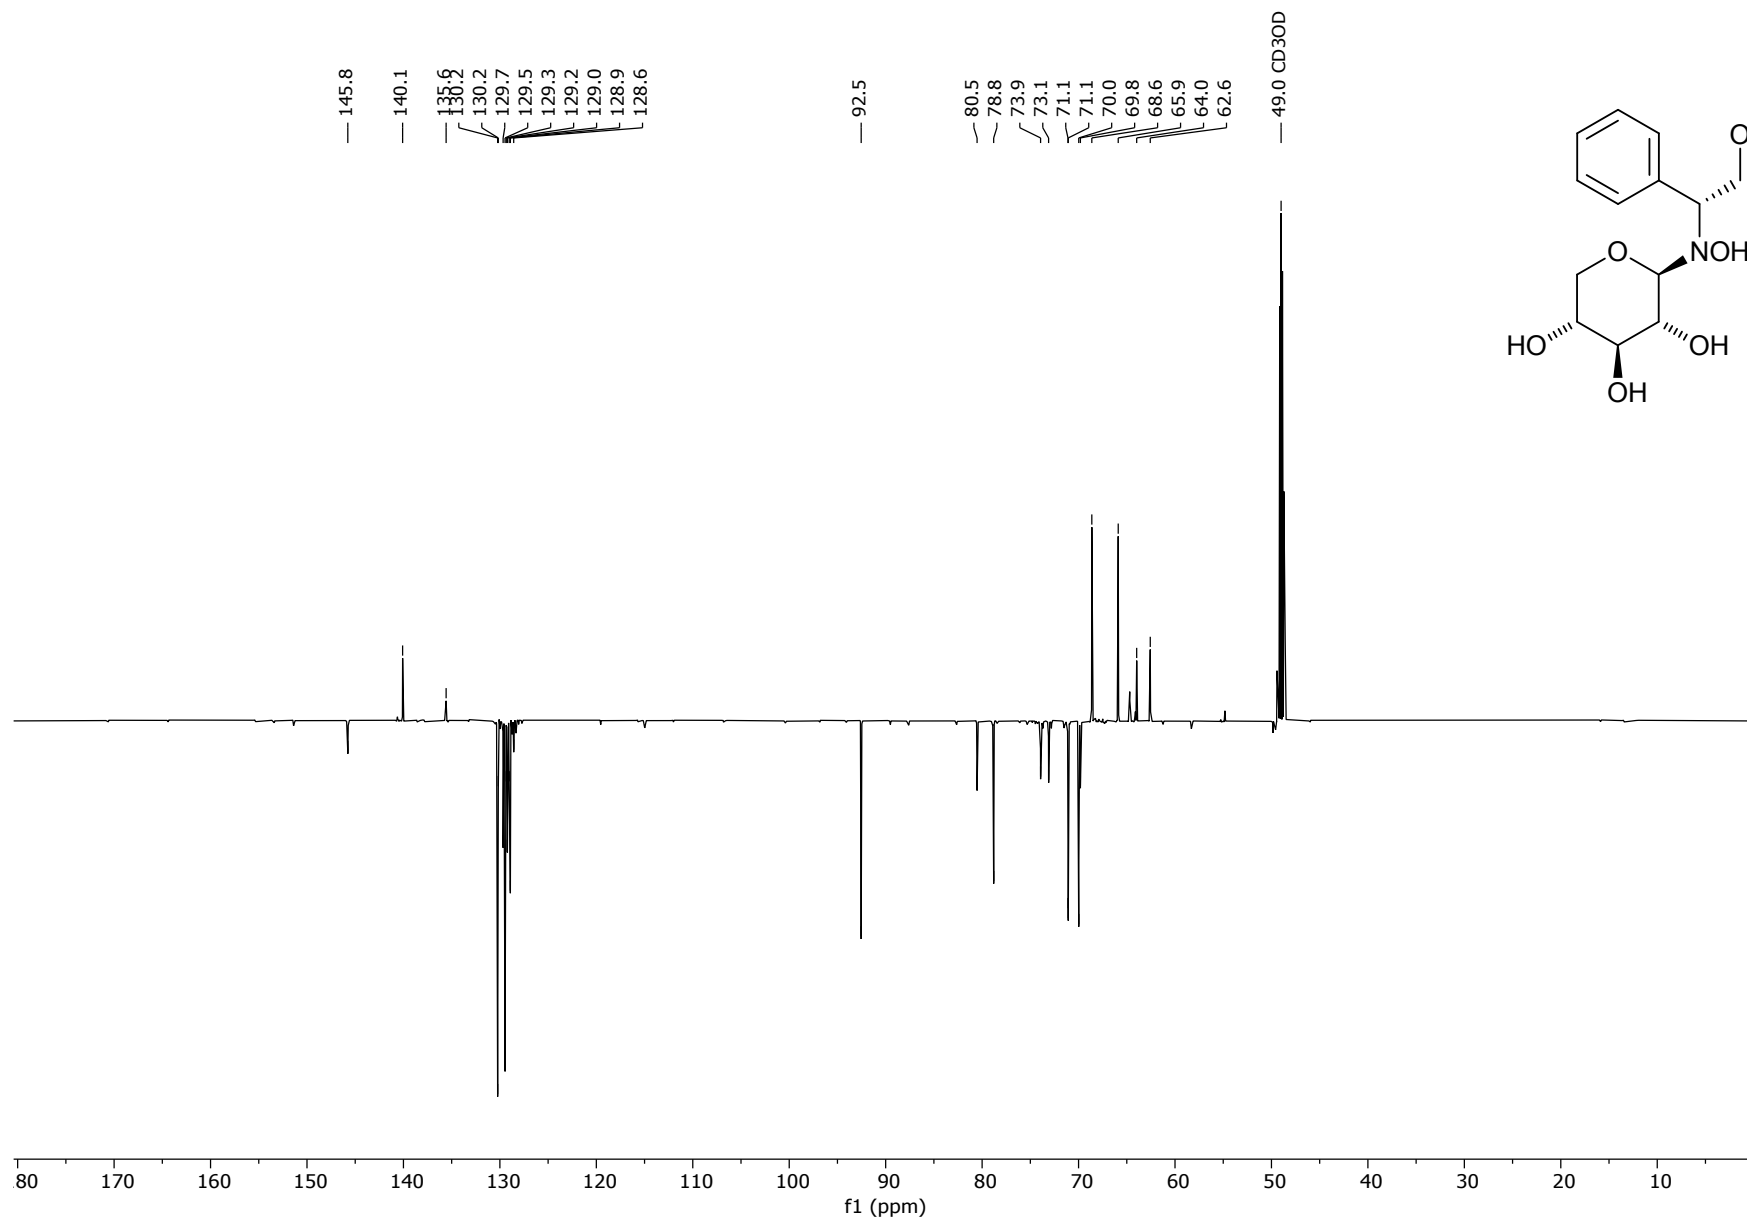

<sup>1</sup>H-NMR spectrum of 5a (CD<sub>3</sub>OD)

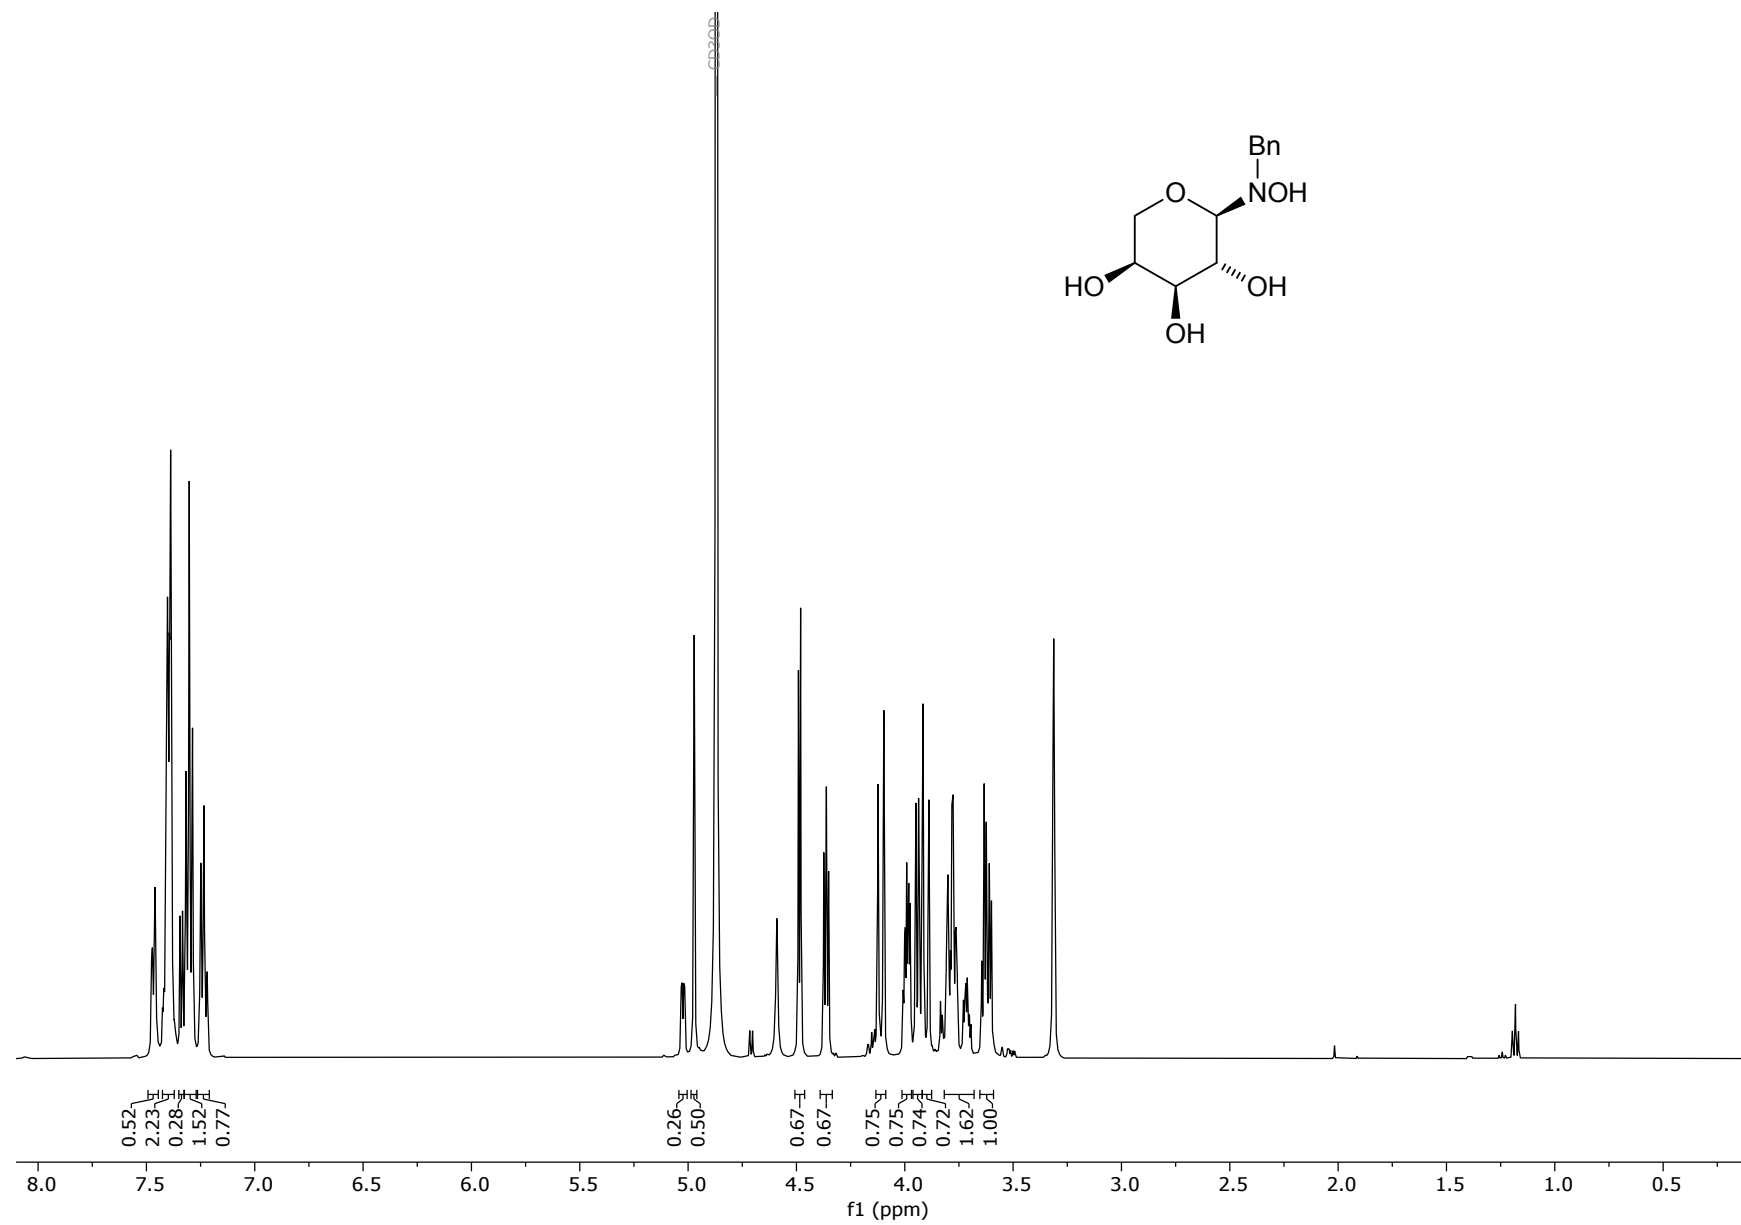

<sup>13</sup>C-NMR spectrum of 5a (CD<sub>3</sub>OD)

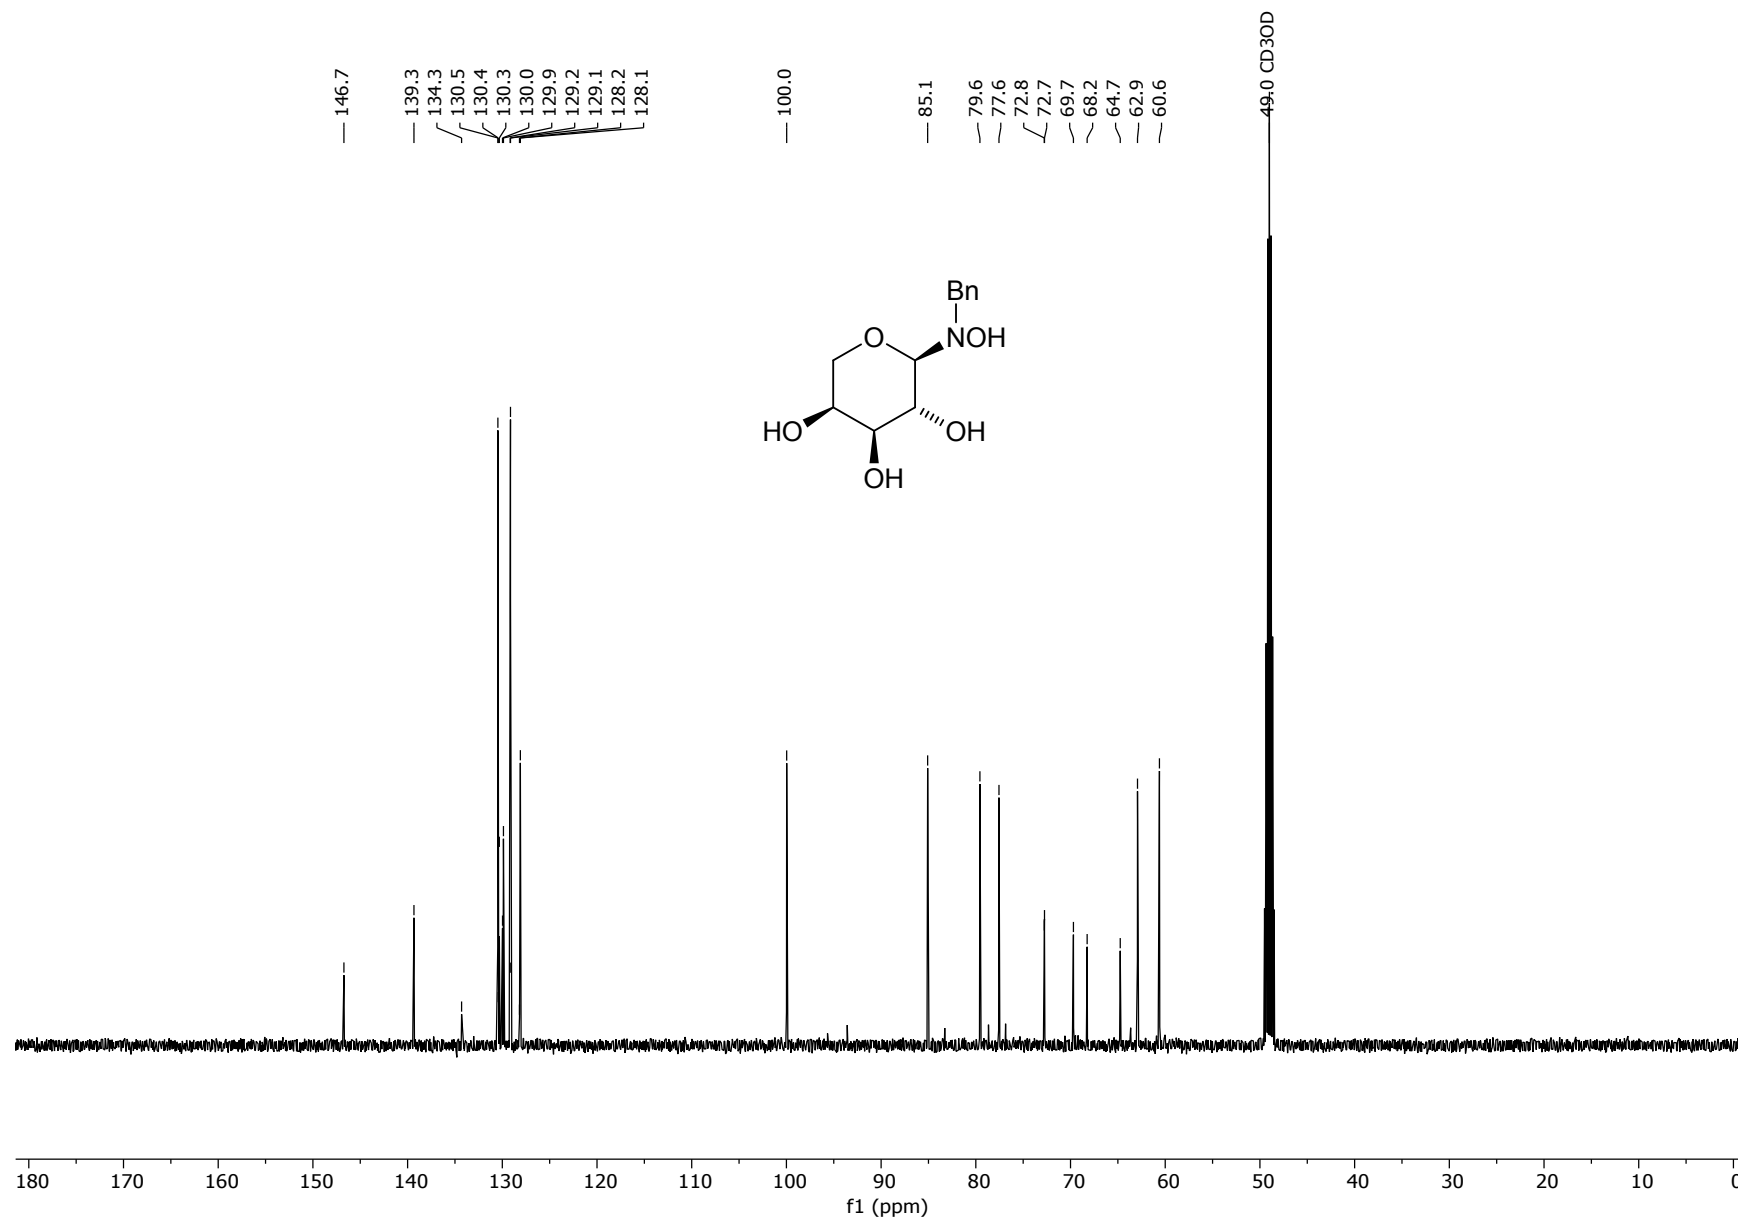

<sup>1</sup>H-NMR spectrum of 5b (CD<sub>3</sub>OD)

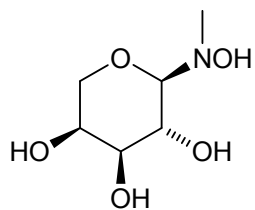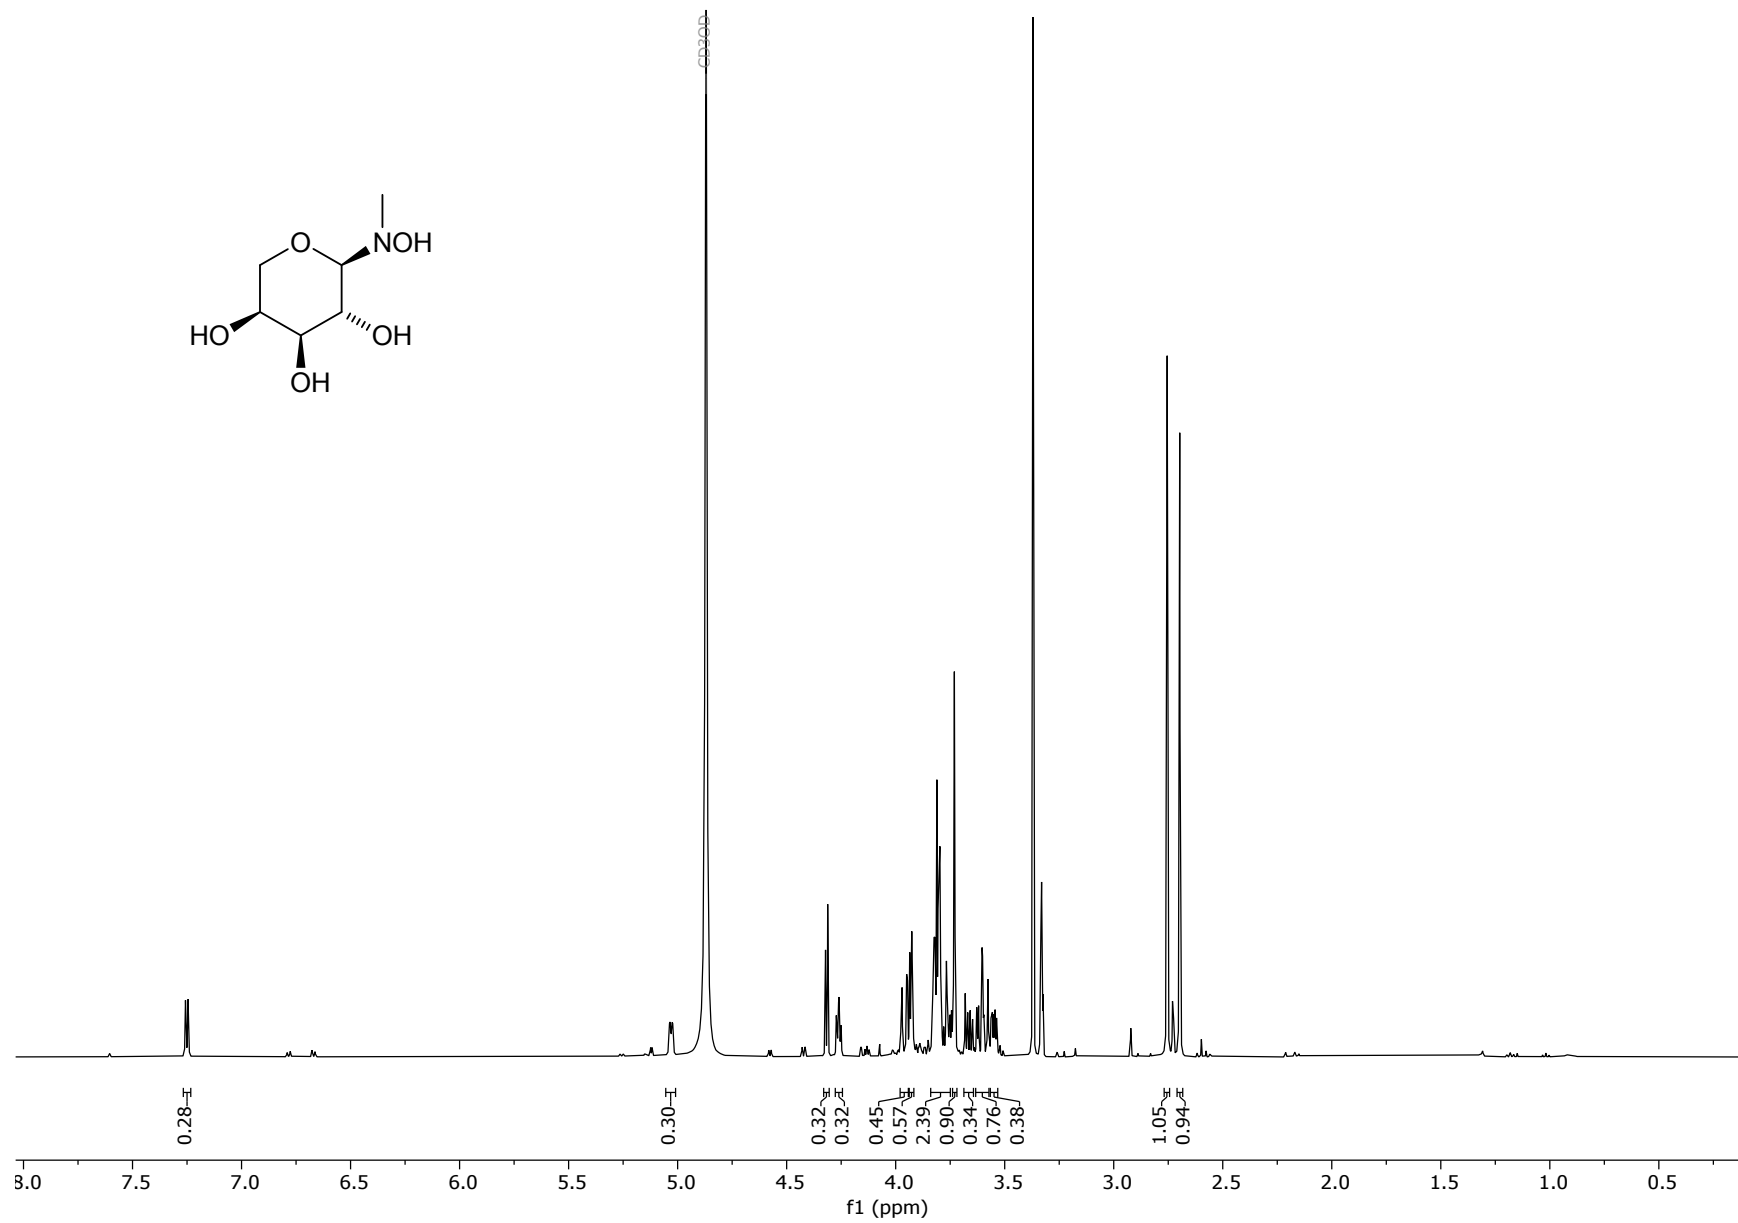

<sup>13</sup>C-NMR spectrum of 5b (CD<sub>3</sub>OD)

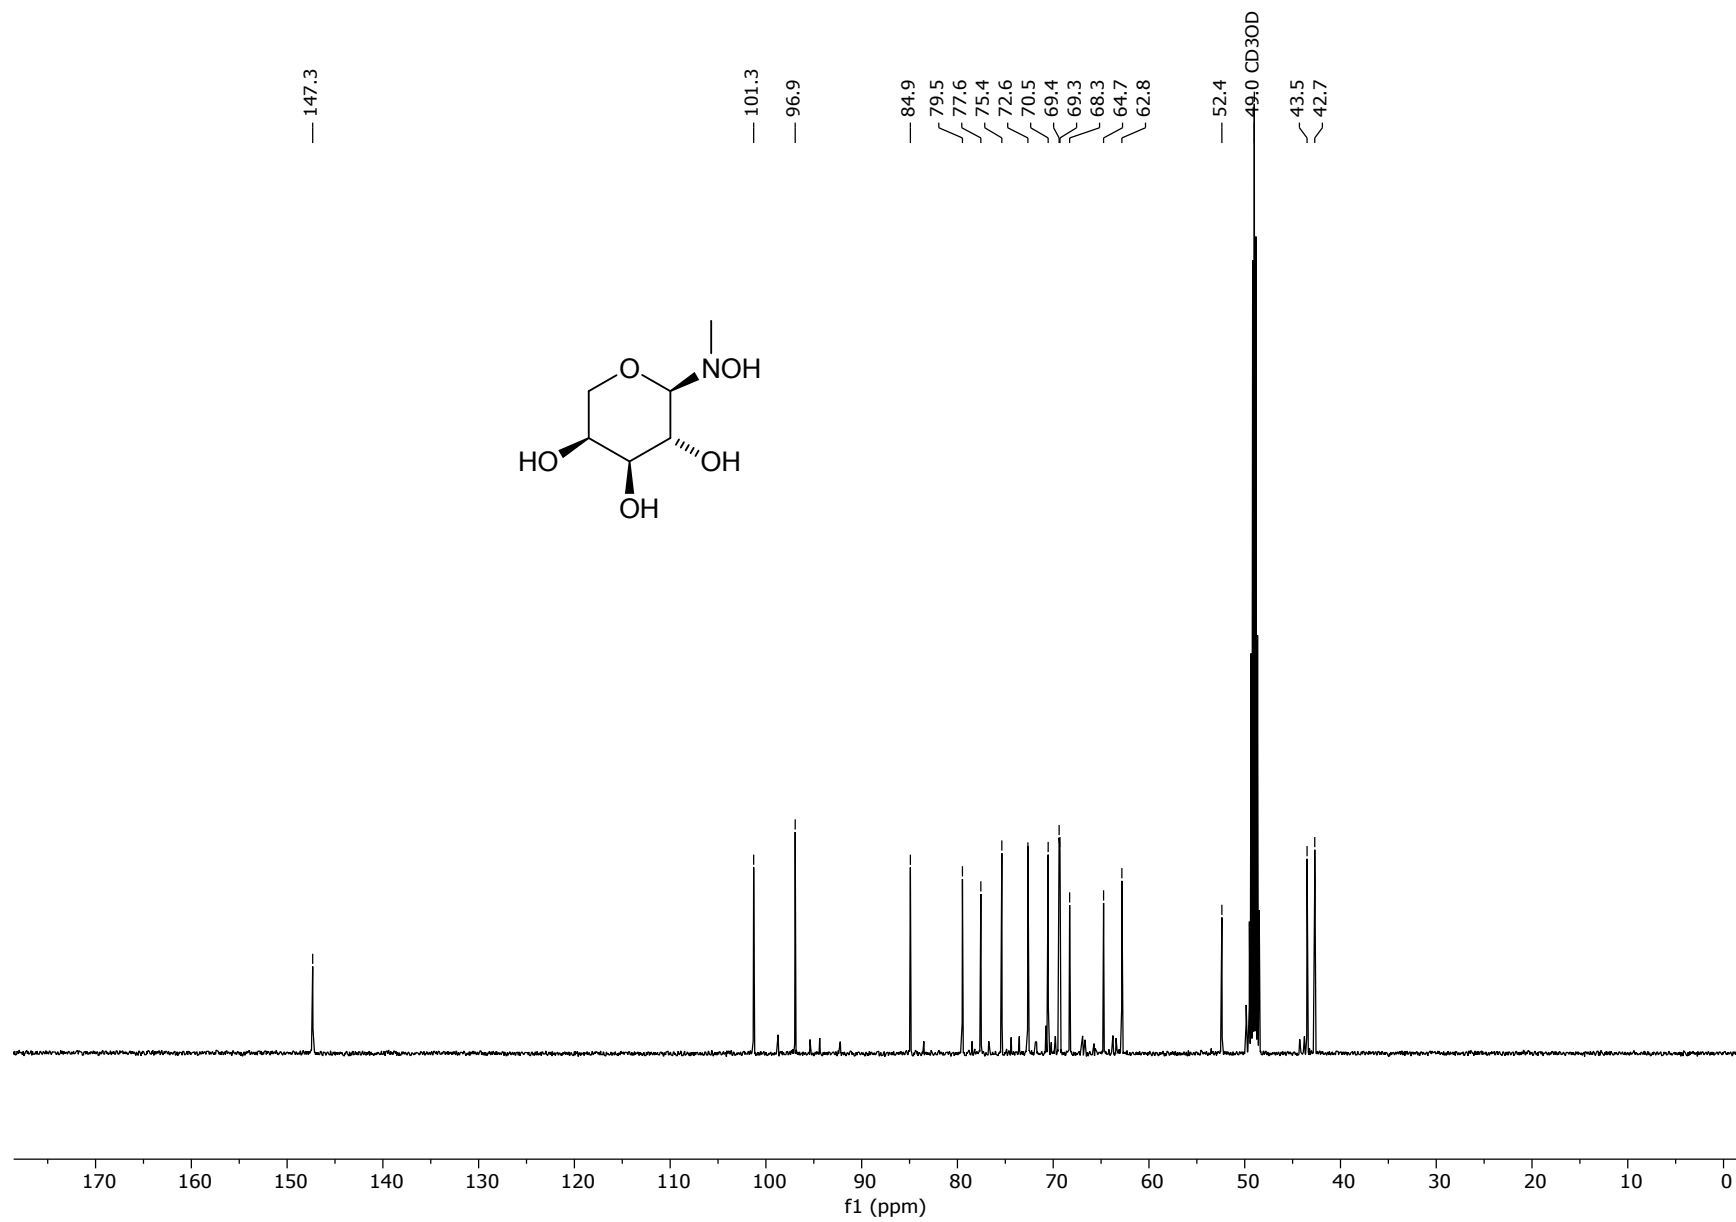



<sup>1</sup>H-NMR spectrum of 5c (CD<sub>3</sub>OD)

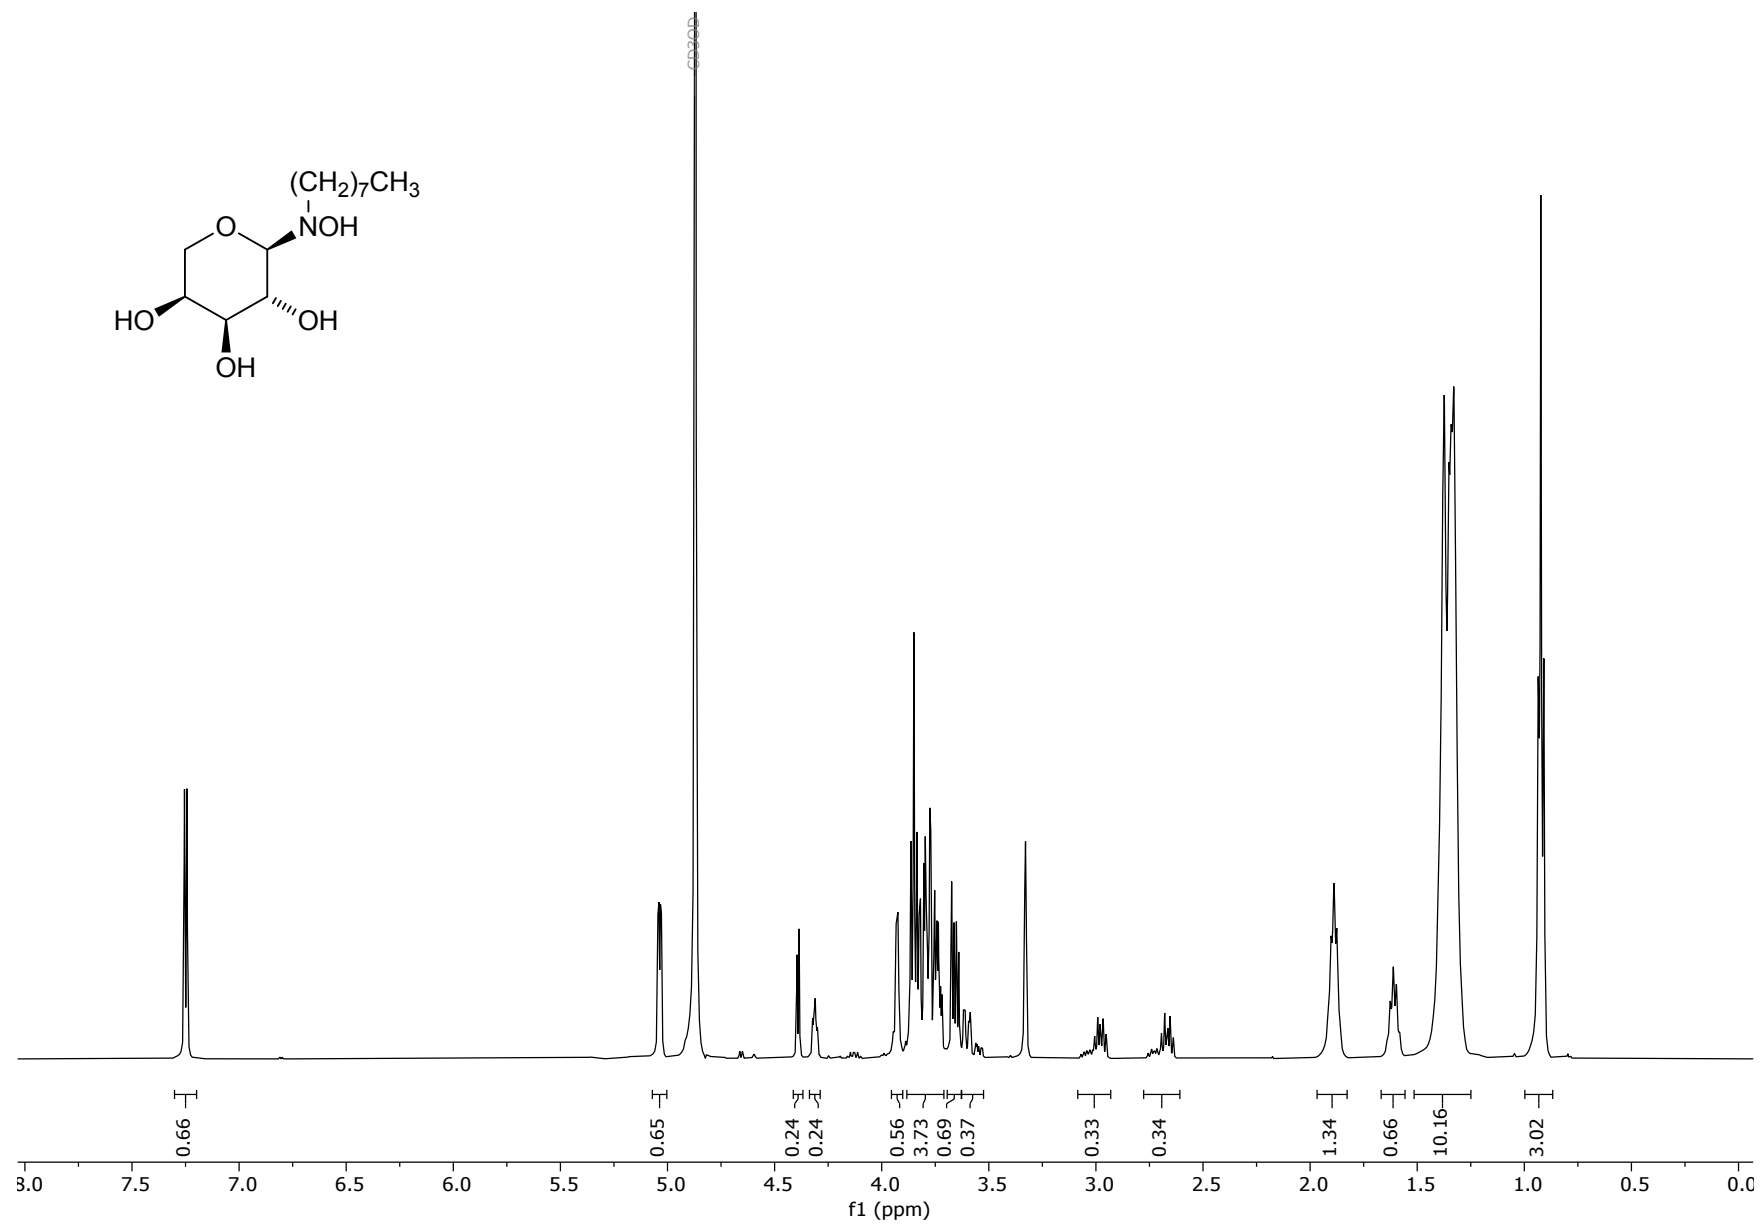

<sup>13</sup>C-NMR spectrum of 5c (CD<sub>3</sub>OD)

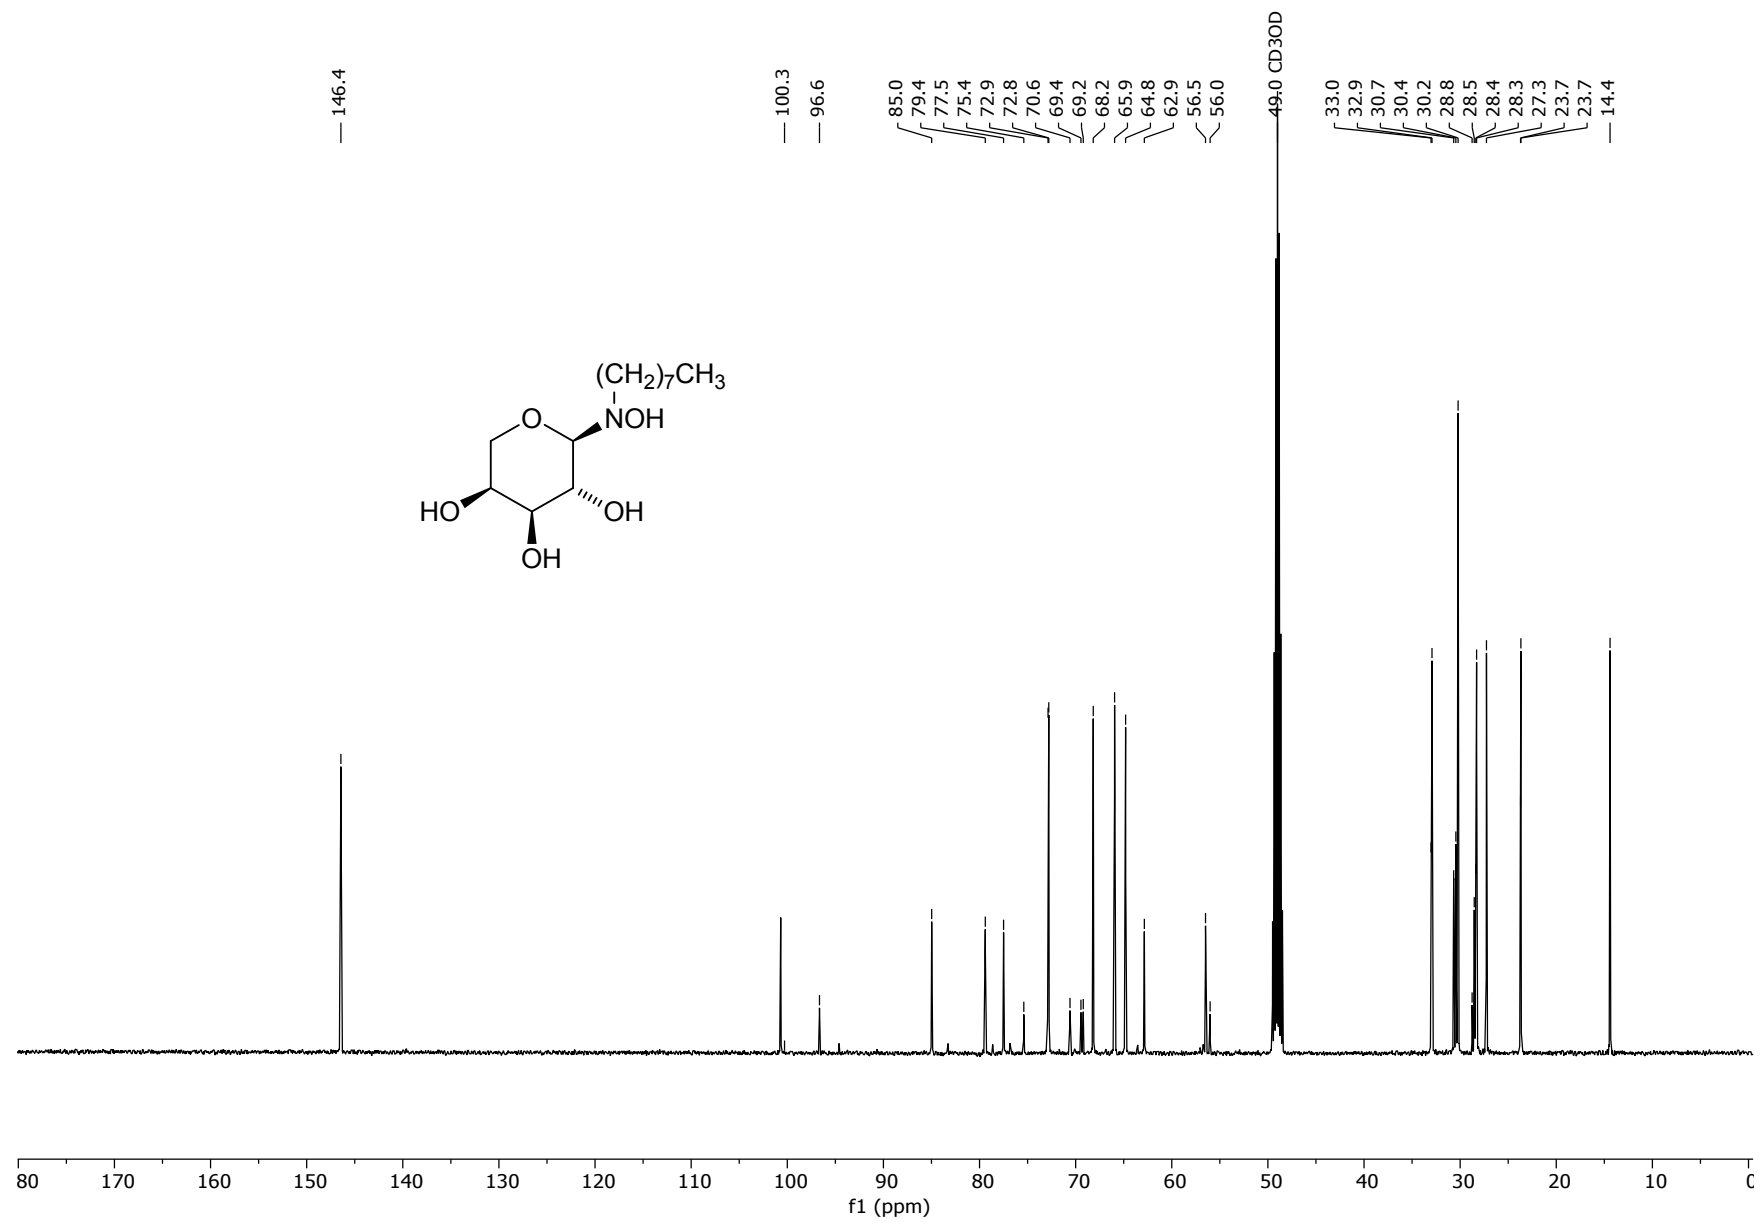

<sup>1</sup>H-NMR spectrum of 6a (CD<sub>3</sub>OD)

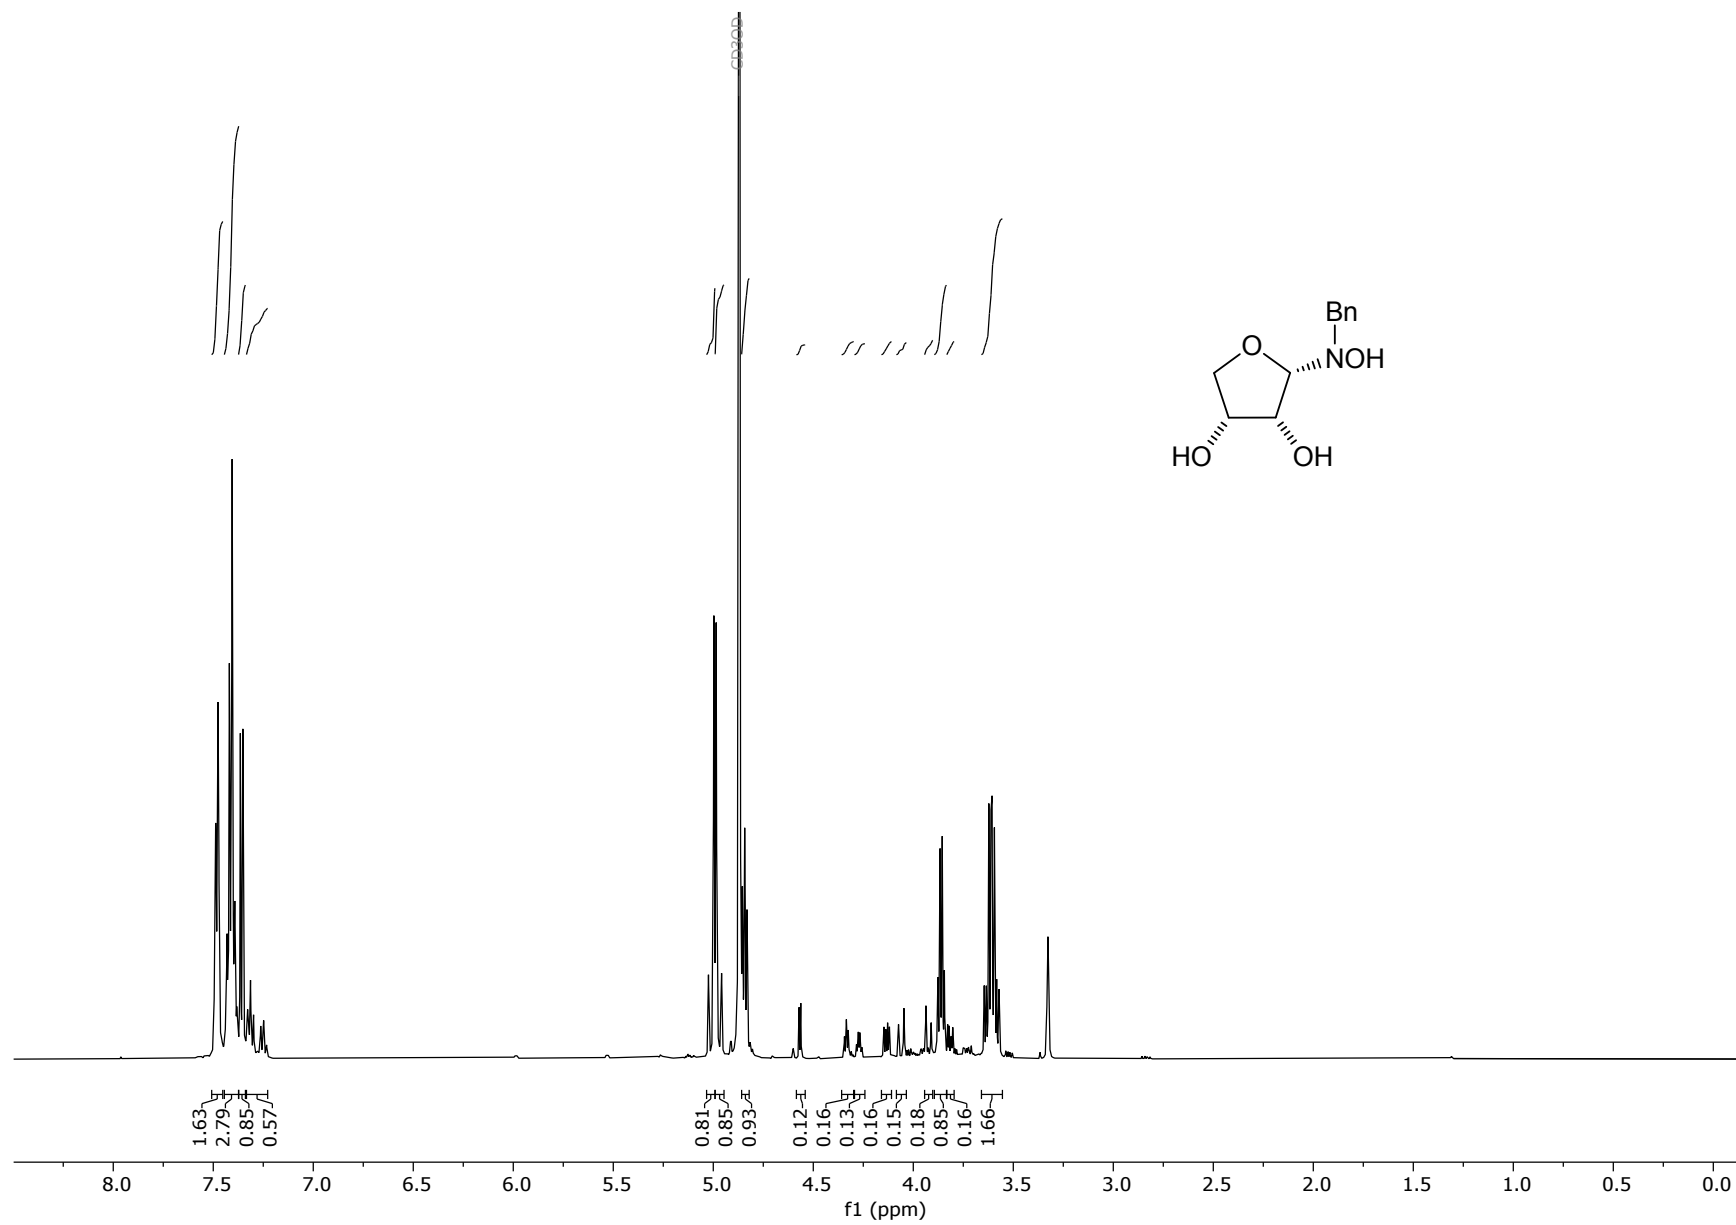

<sup>13</sup>C-NMR spectrum of 6a (CD<sub>3</sub>OD)

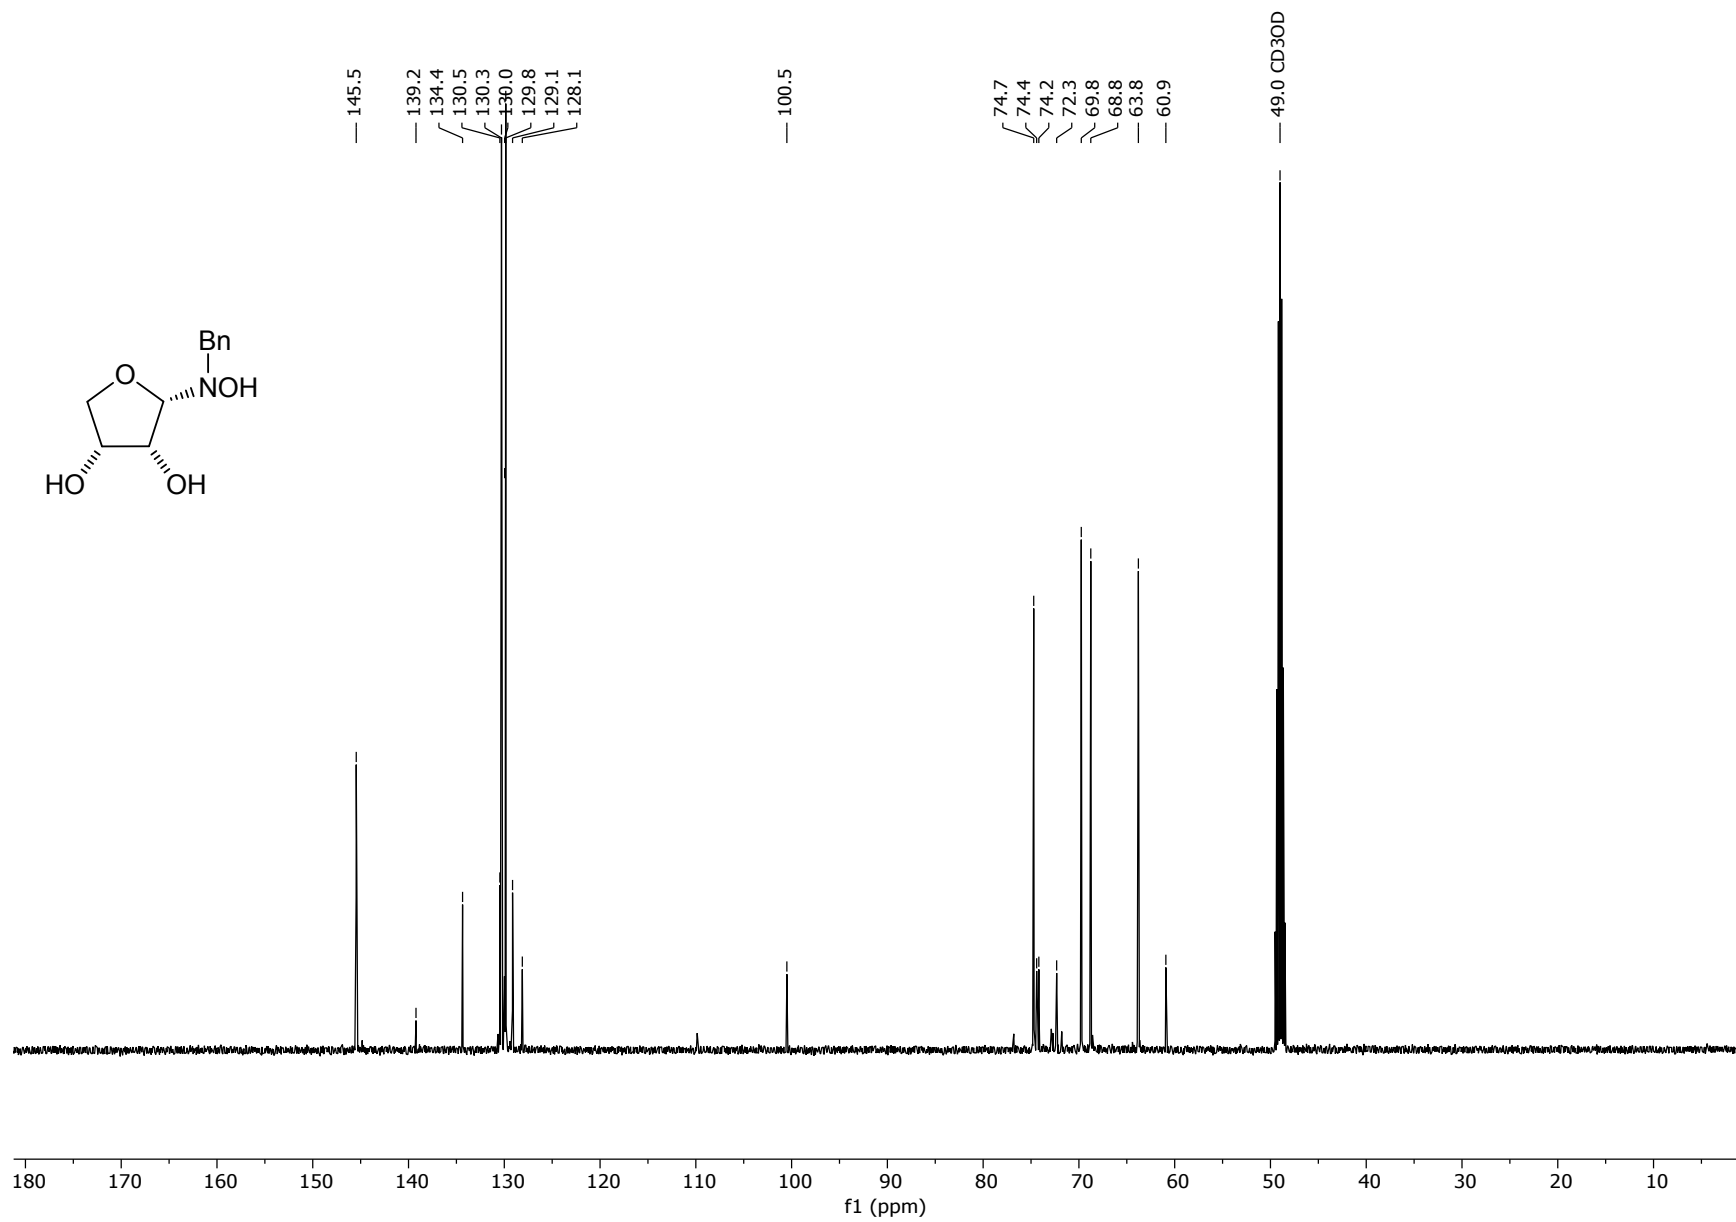

<sup>1</sup>H-NMR spectrum of 7a (CD<sub>3</sub>OD)

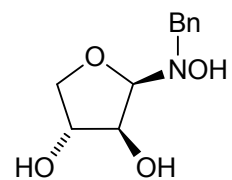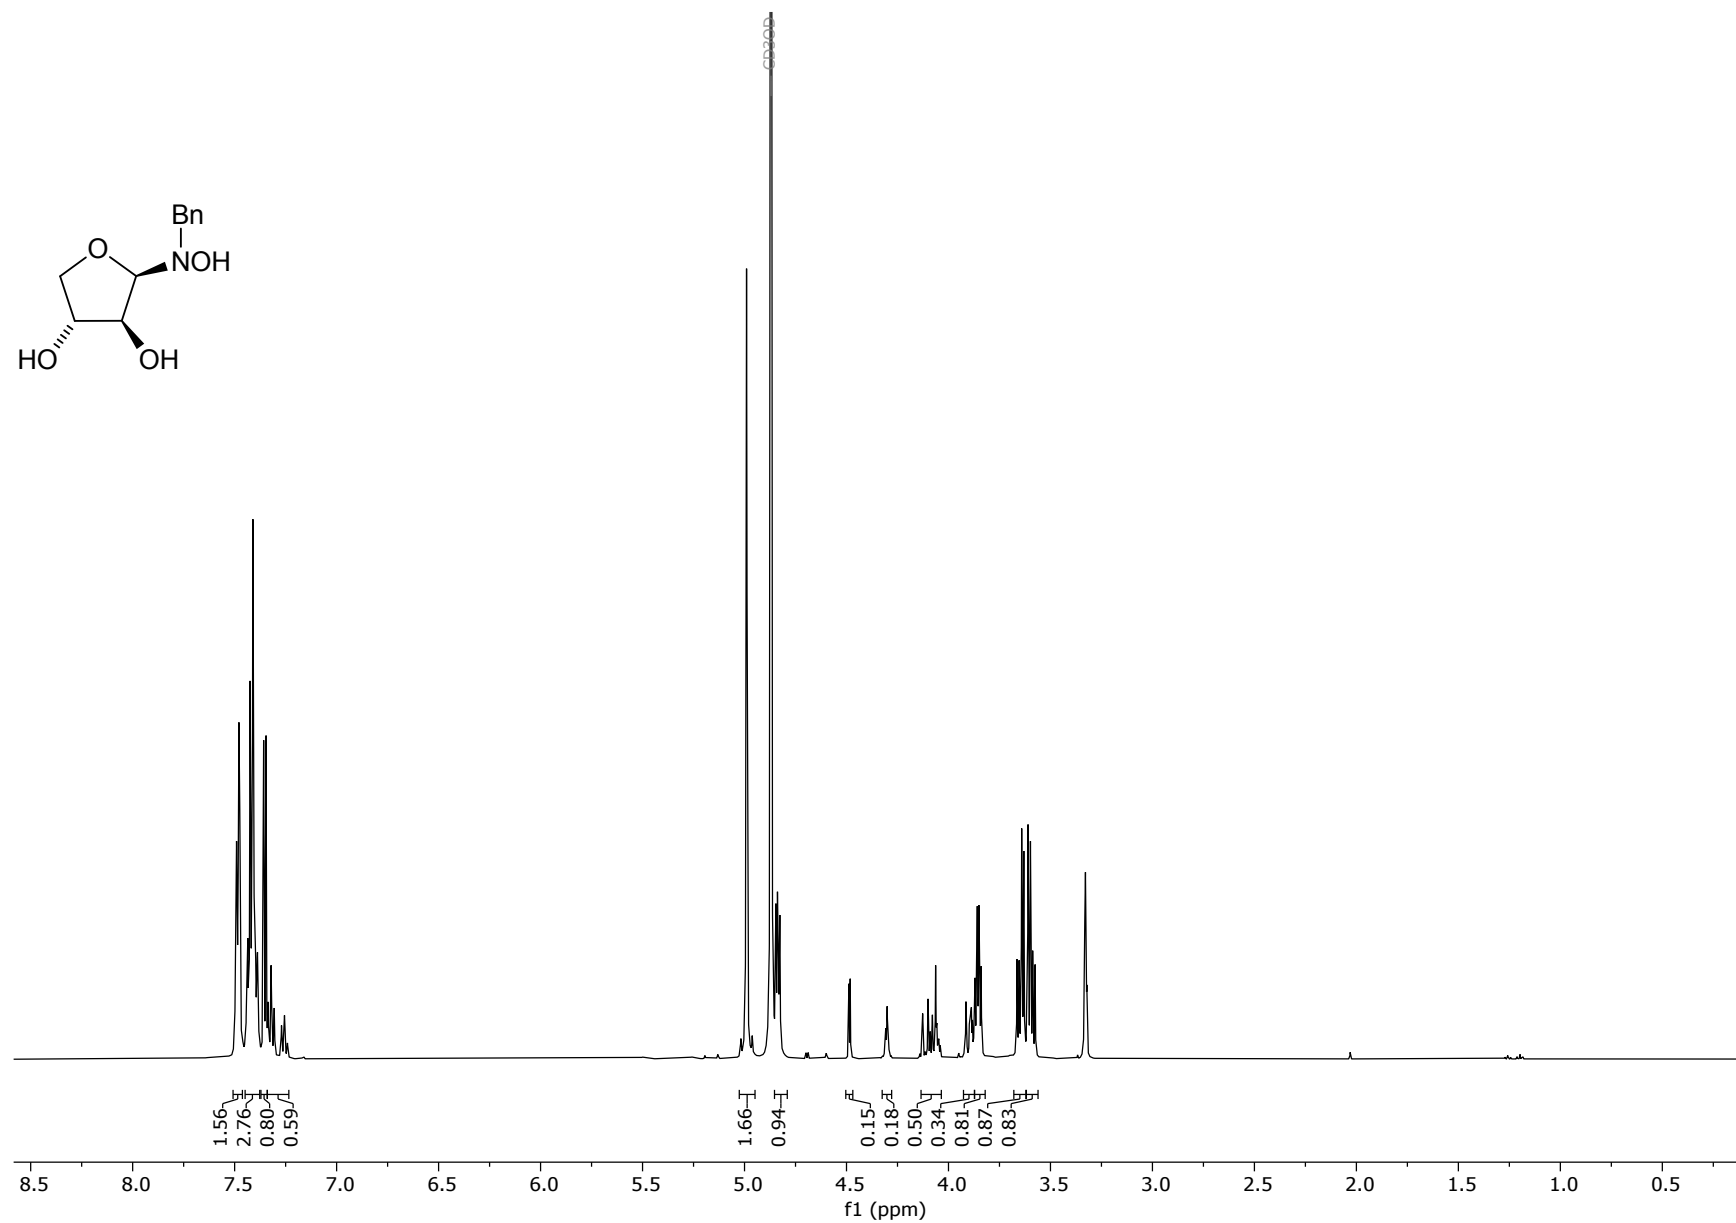

<sup>13</sup>C-NMR spectrum (J-MOD) of 7a (CD<sub>3</sub>OD)

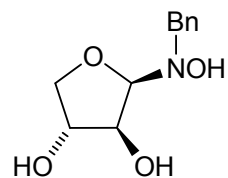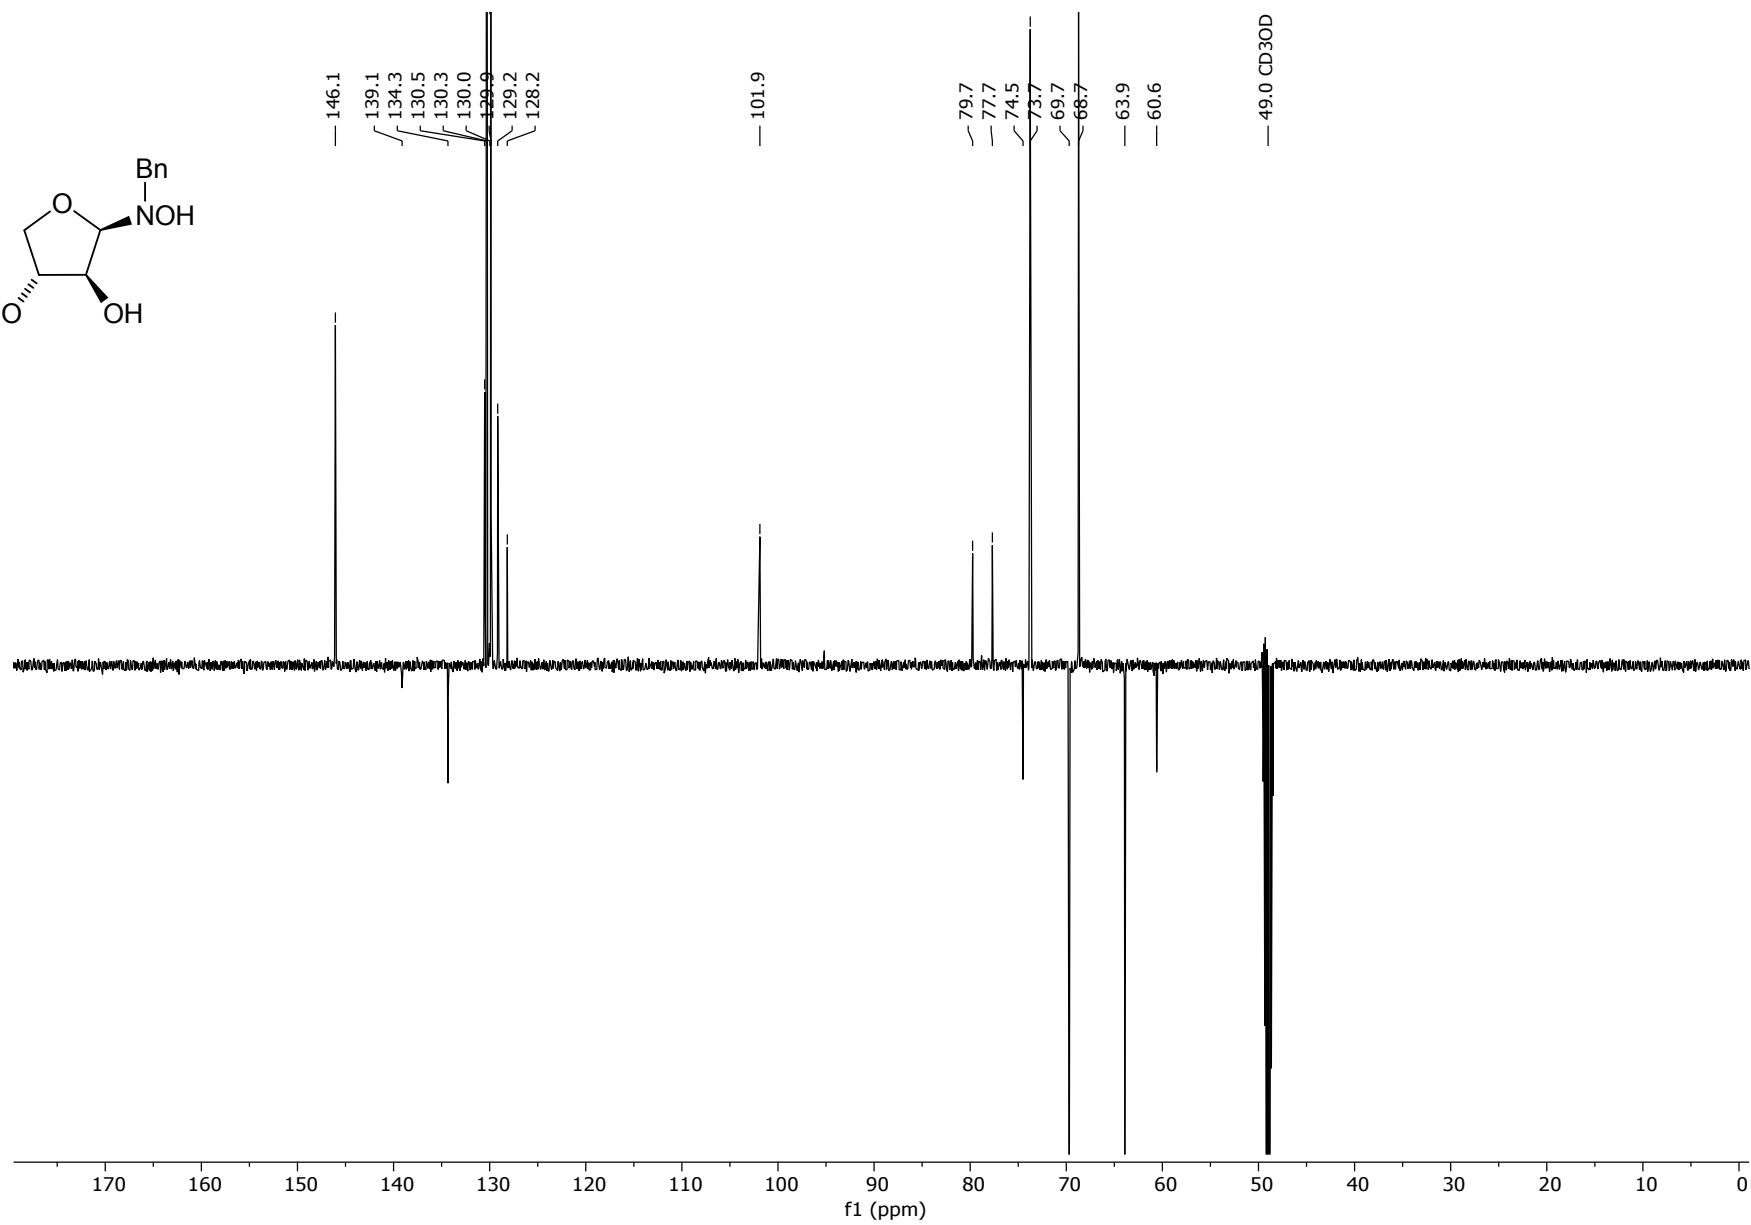

<sup>1</sup>H-NMR spectrum of (3S,5S)-10 (CD<sub>3</sub>OD)

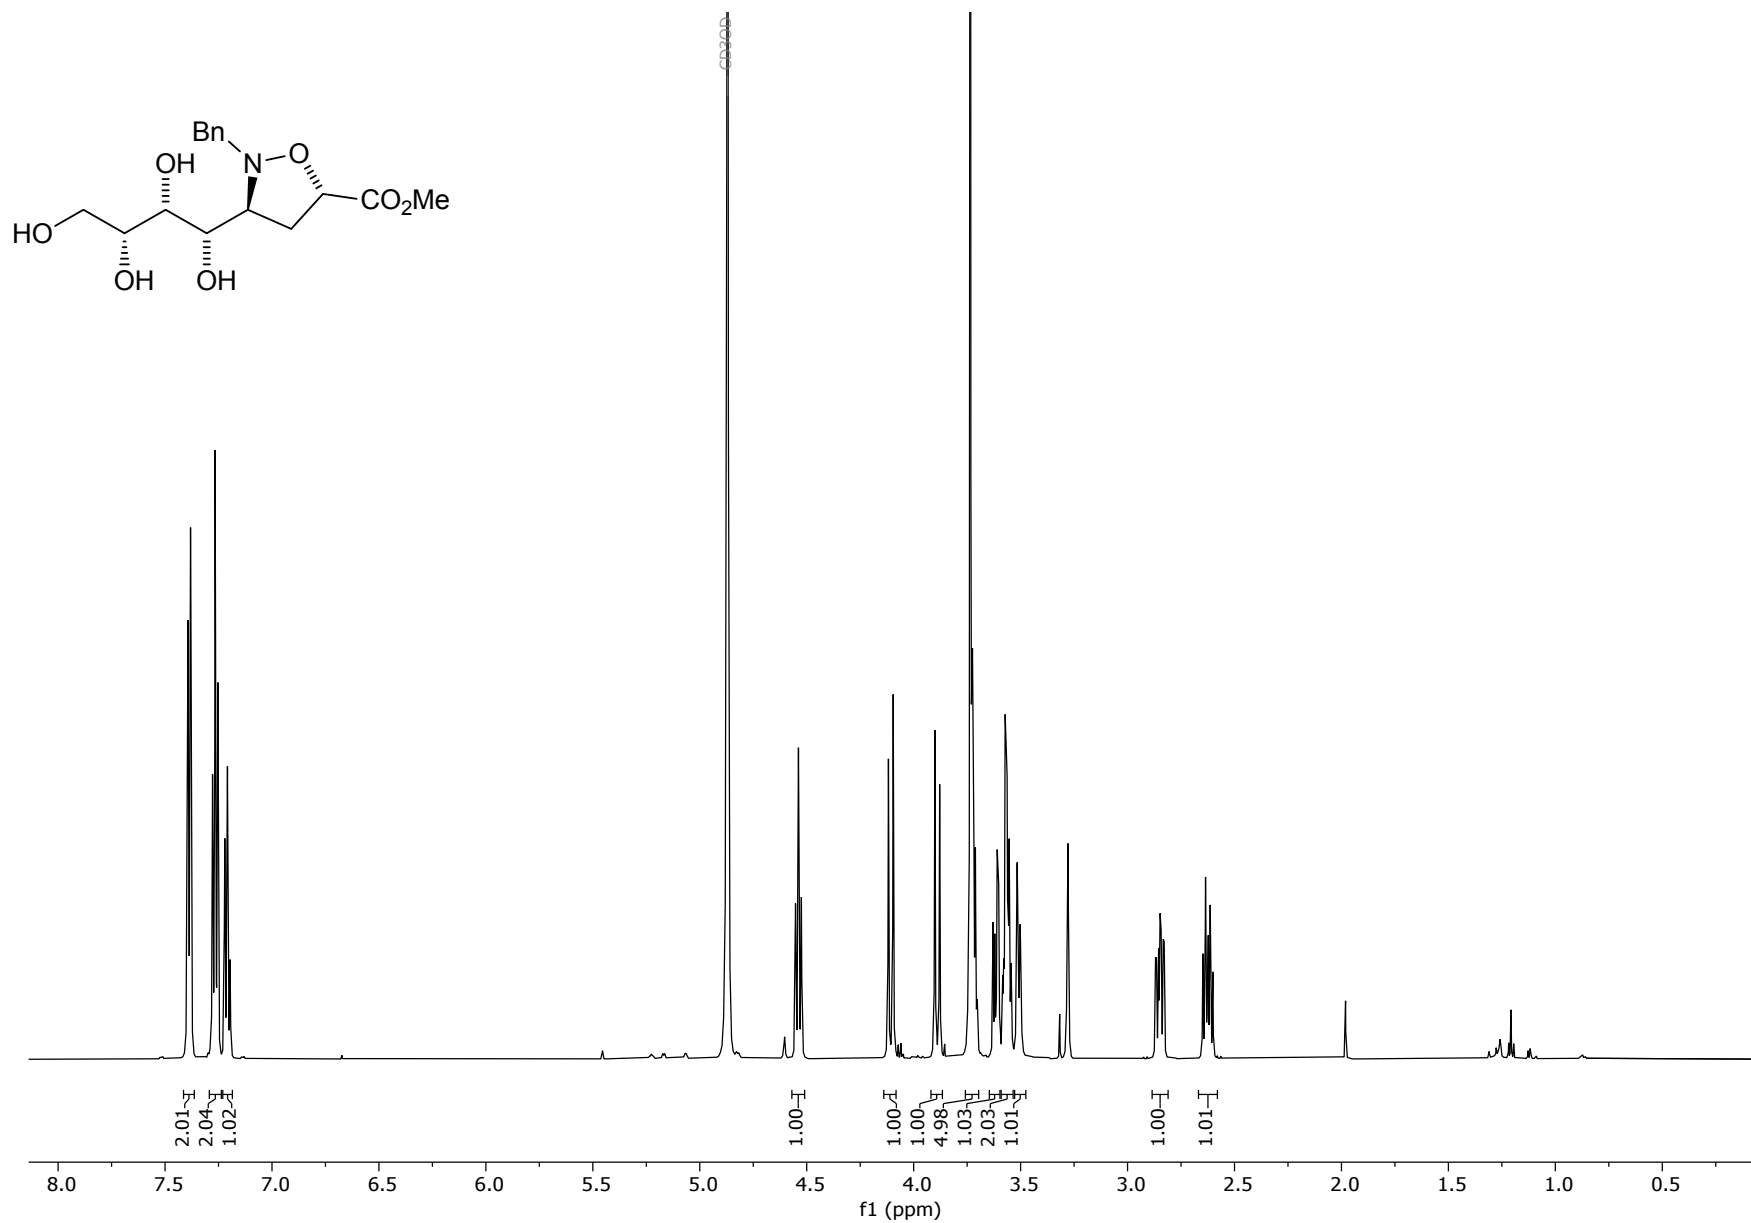

<sup>13</sup>C-NMR spectrum of (3*S*,5*S*)-10 (CD<sub>3</sub>OD)

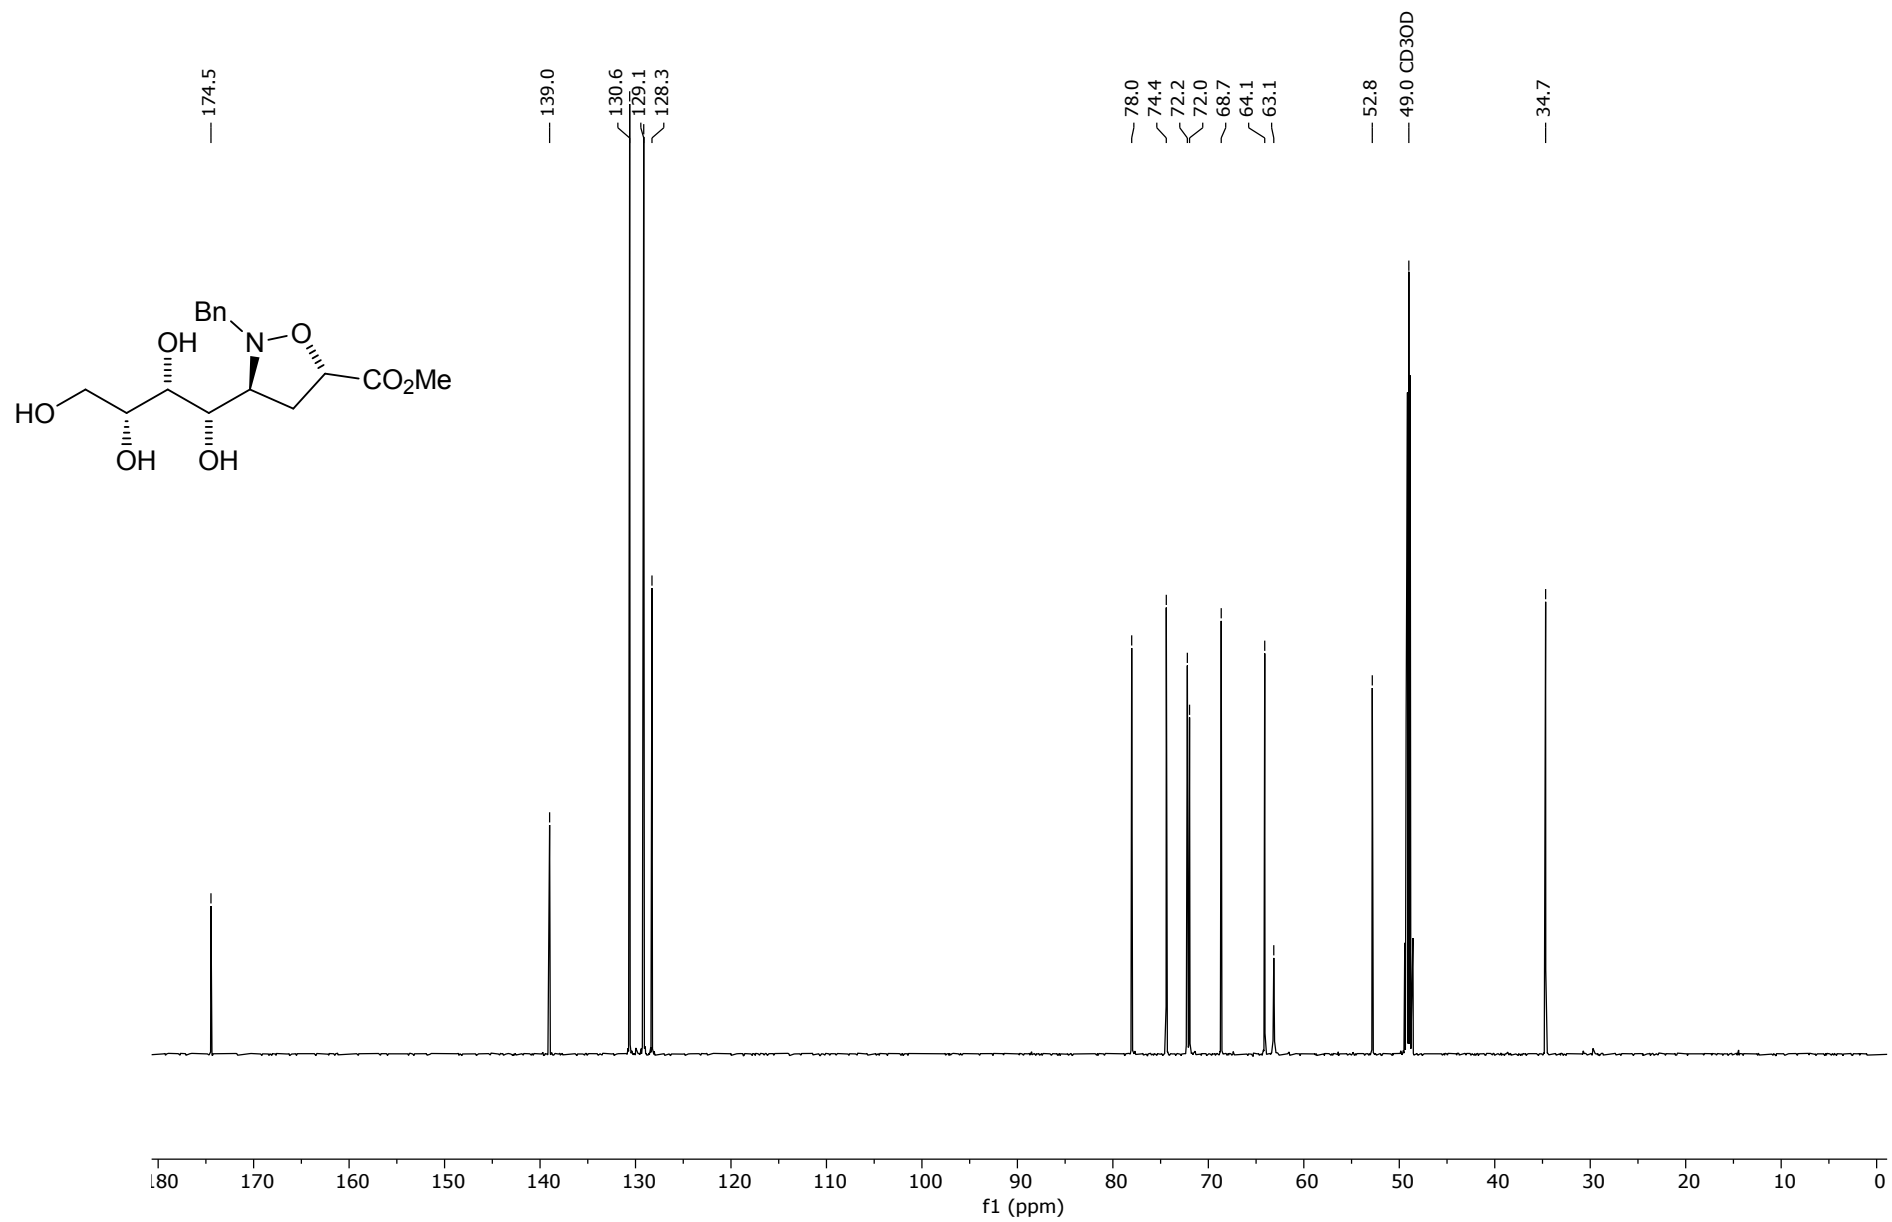



<sup>1</sup>H-NMR spectrum of (3*S*,5*R*)-10 (CD<sub>3</sub>OD)

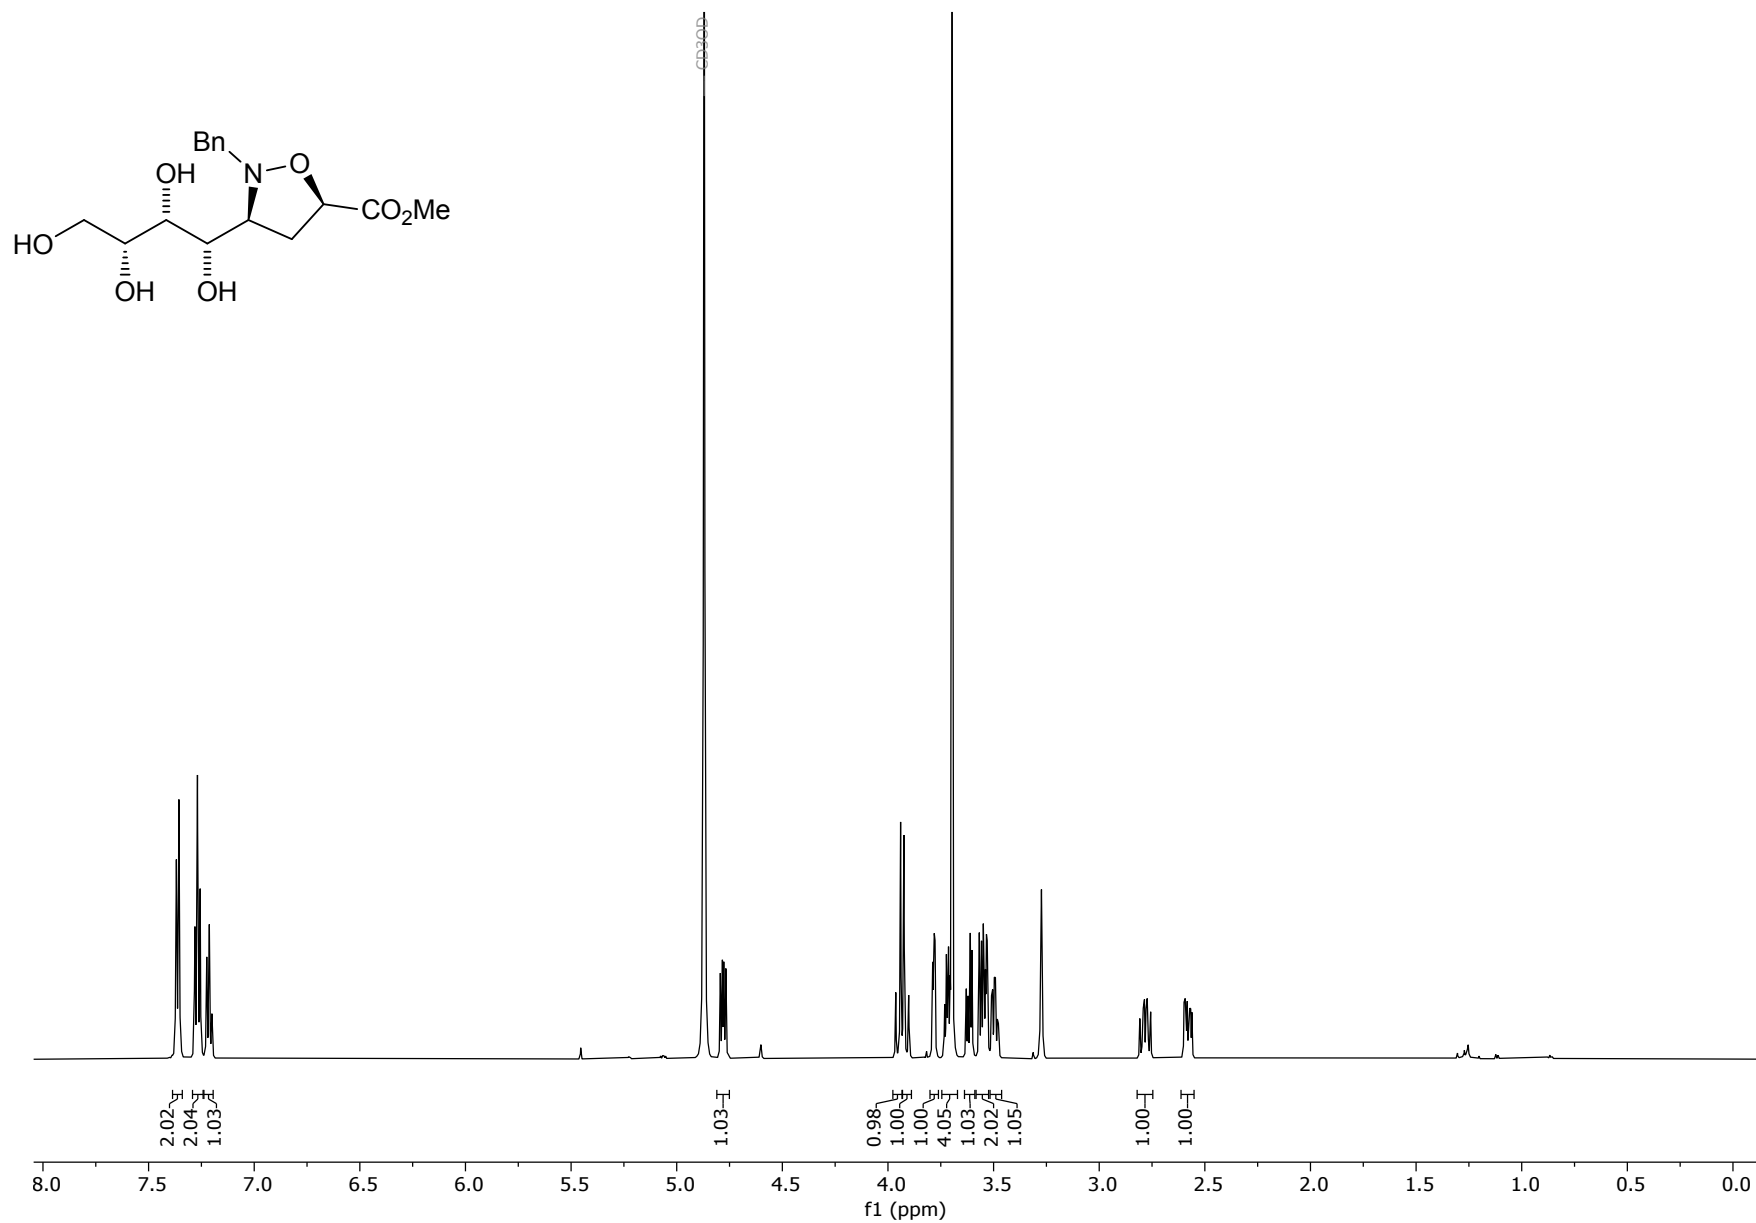

<sup>13</sup>C-NMR spectrum of (3*S*,5*R*)-10 (CD<sub>3</sub>OD)

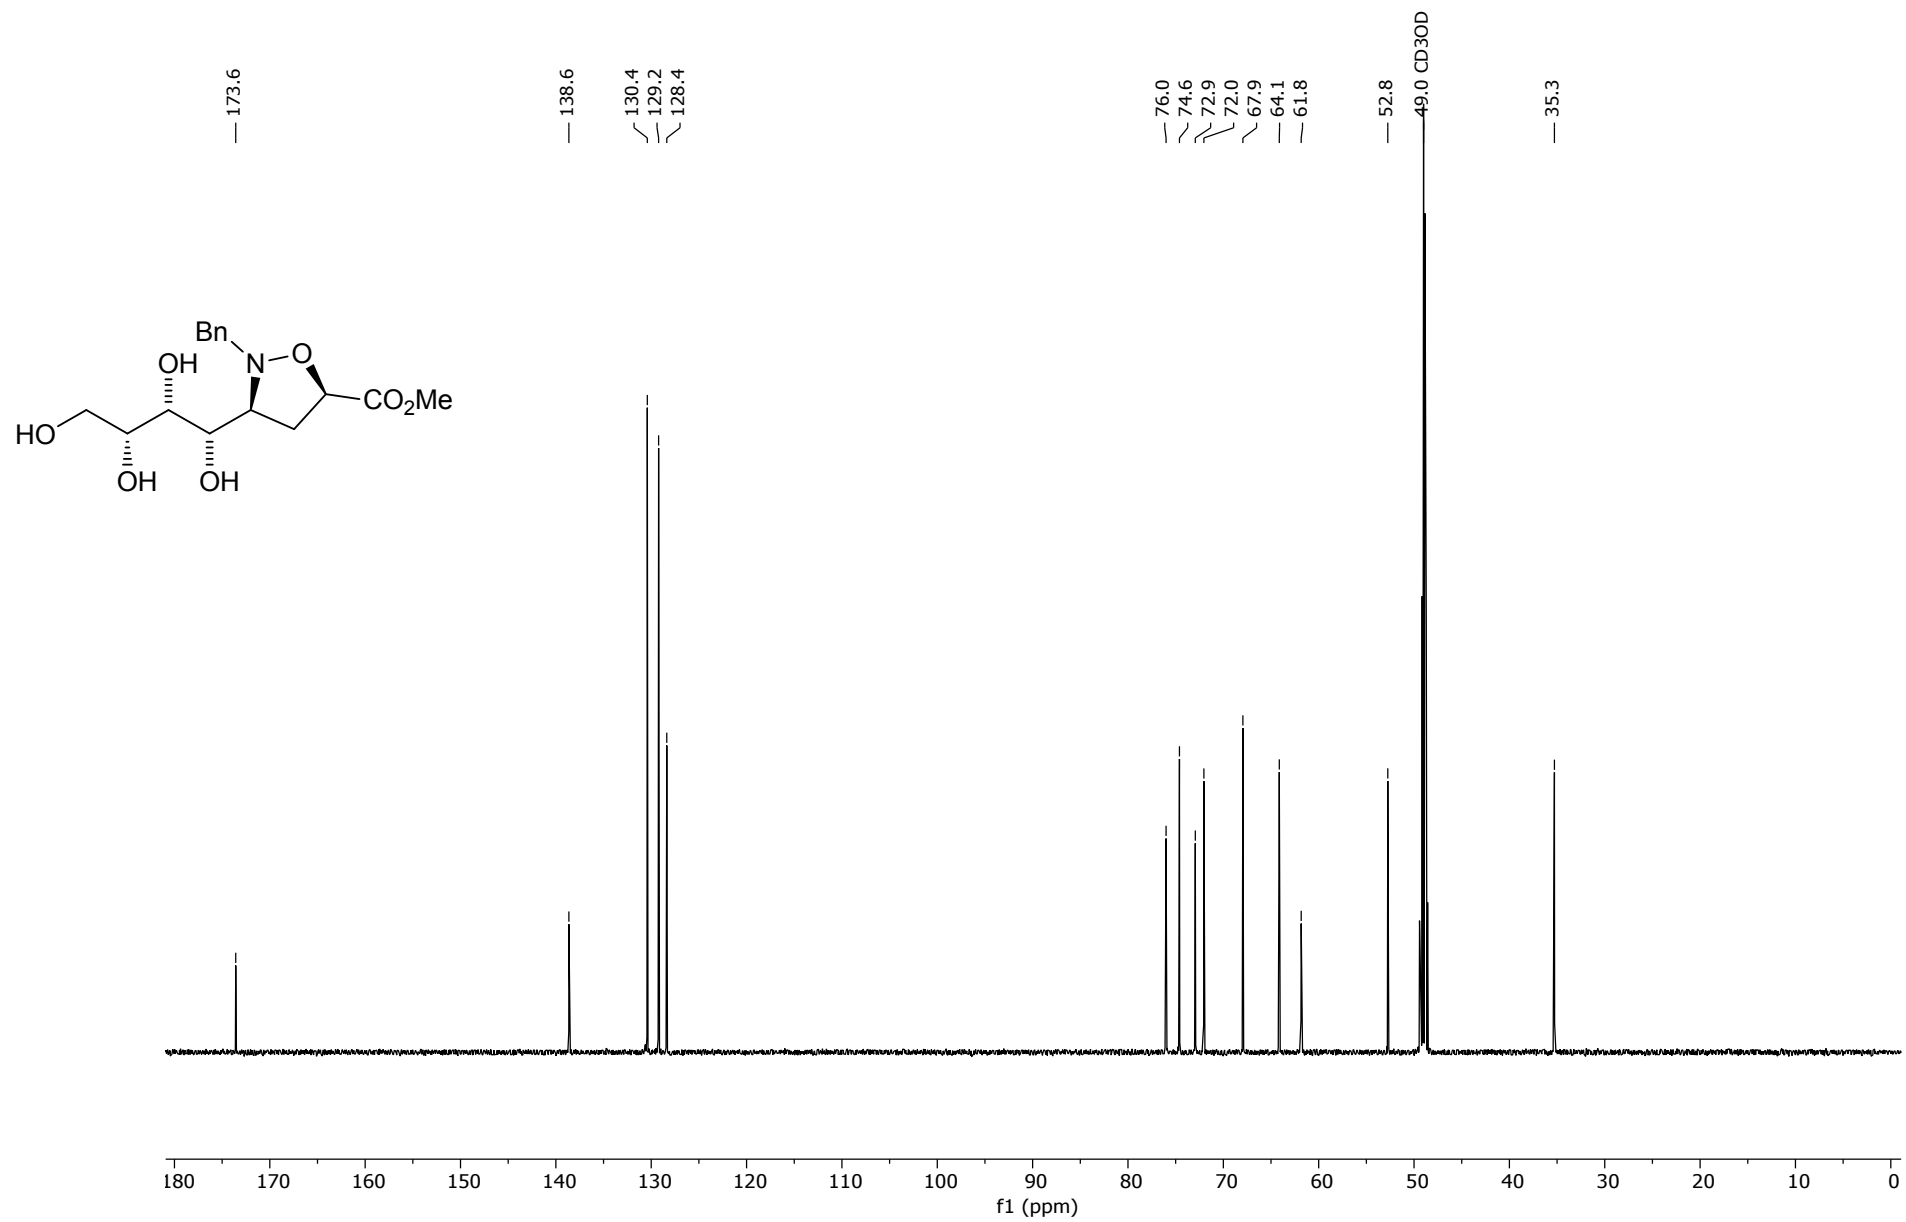

<sup>1</sup>H-NMR spectrum of (3*R*,5*R*)-10 (CD<sub>3</sub>OD)

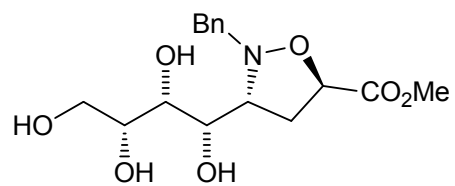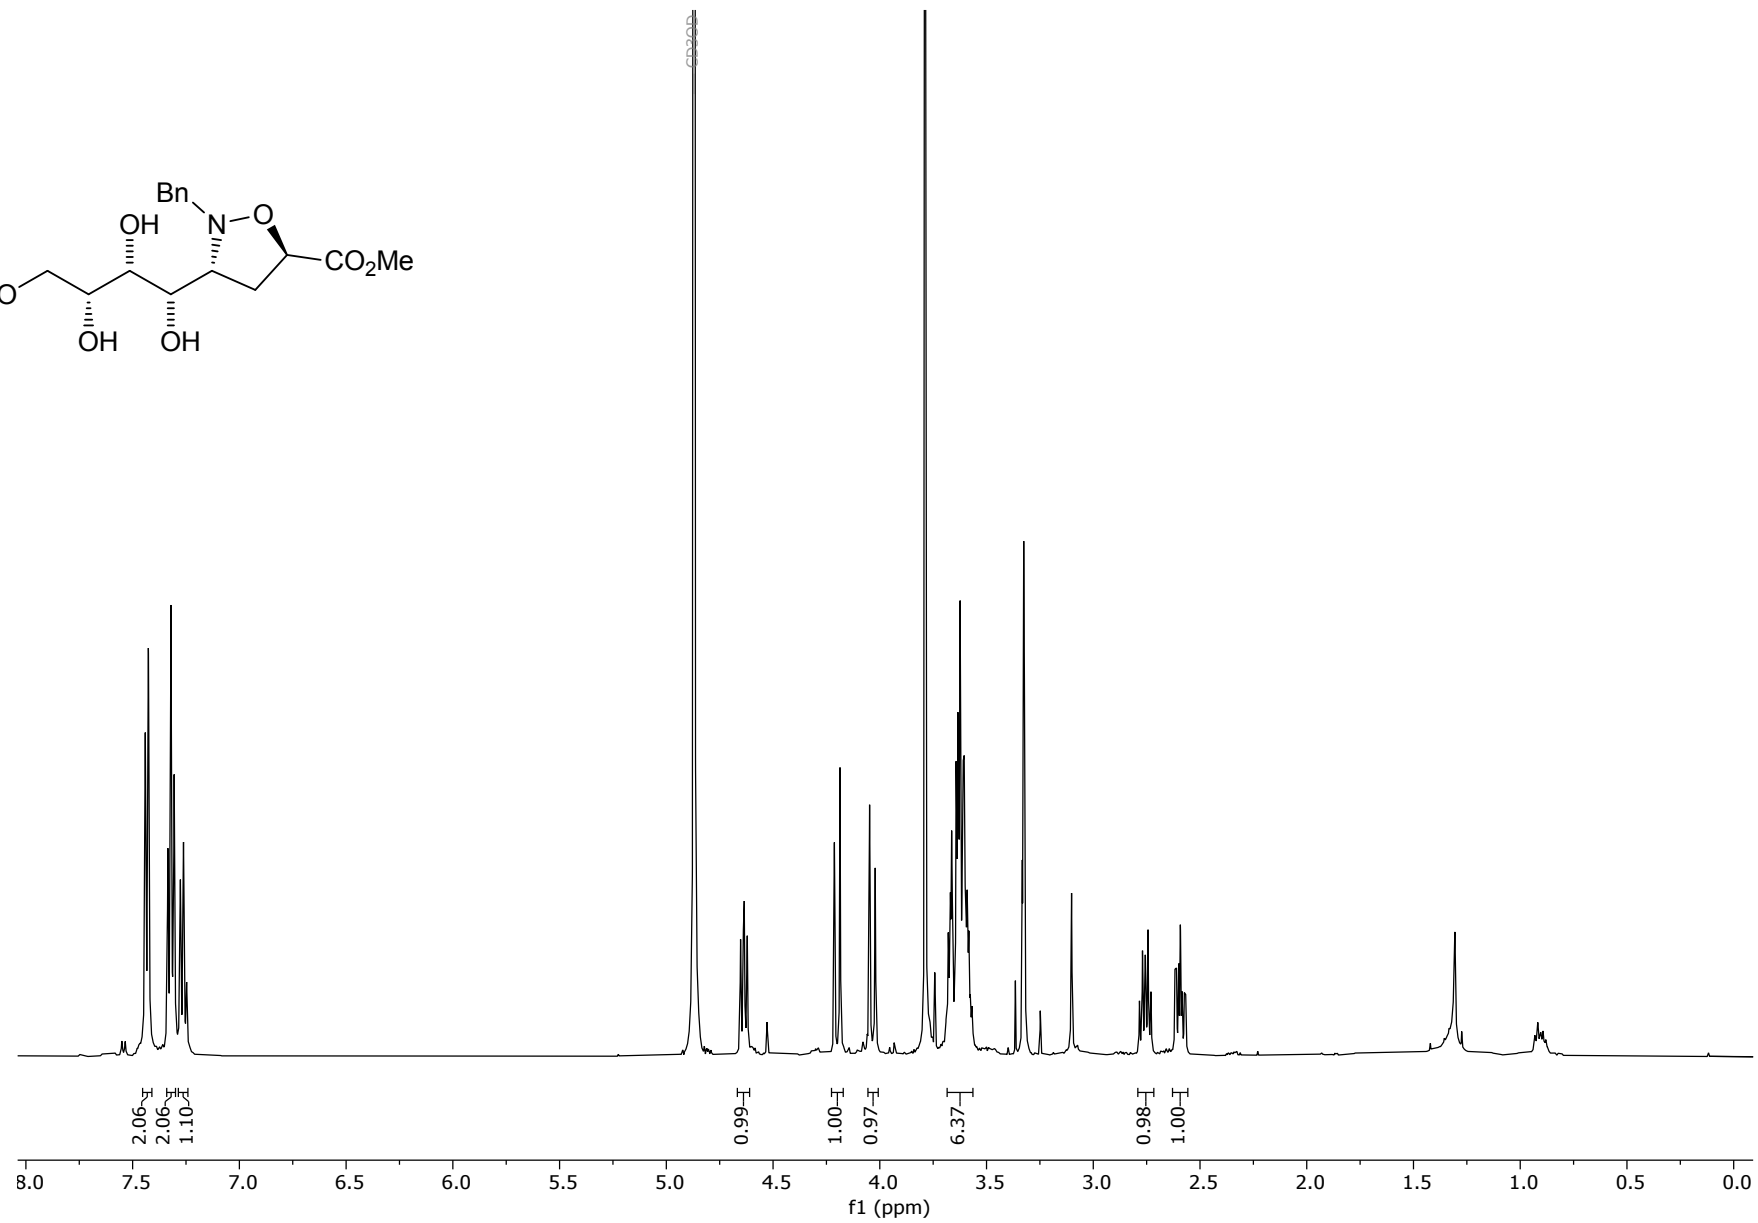

<sup>13</sup>C-NMR spectrum of (3*R*,5*R*)-10 (CD<sub>3</sub>OD)

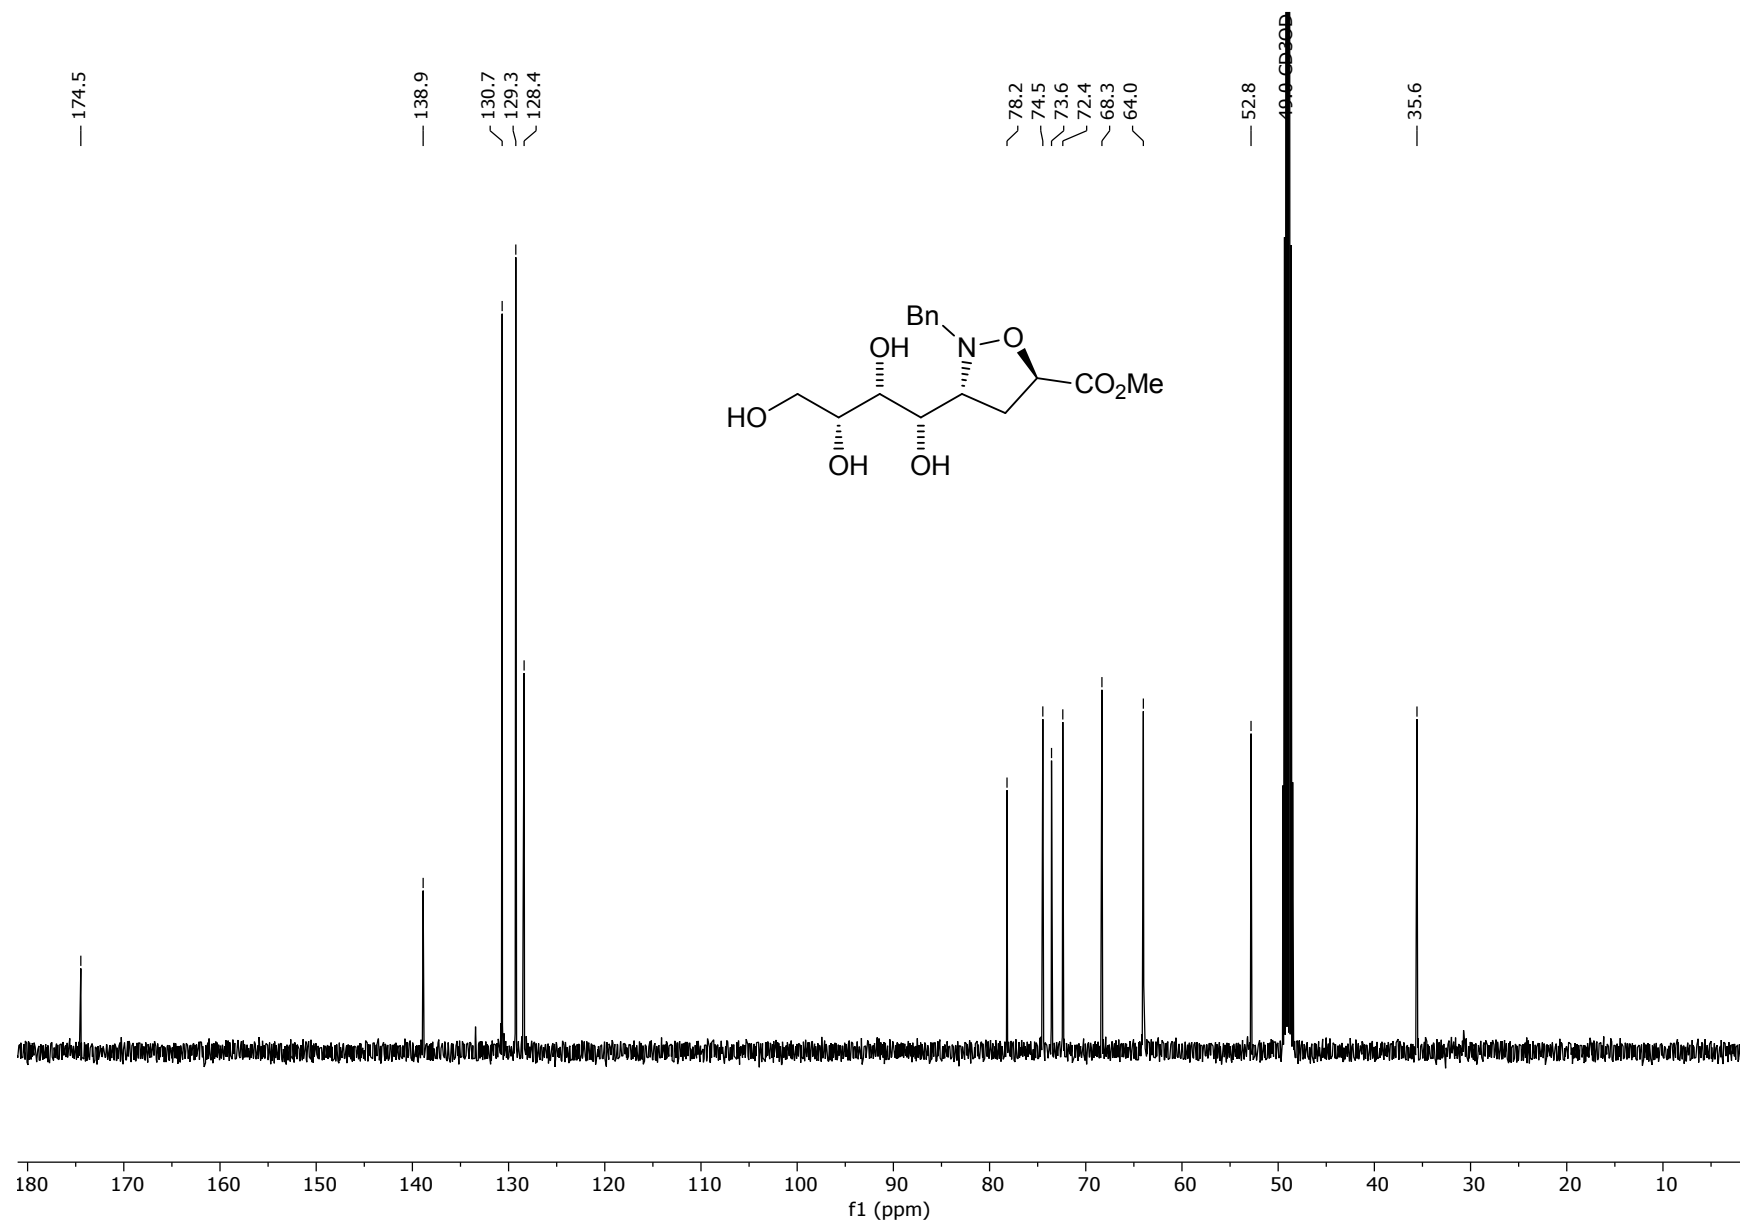

<sup>1</sup>H-NMR spectrum of 10' (CD<sub>3</sub>OD)

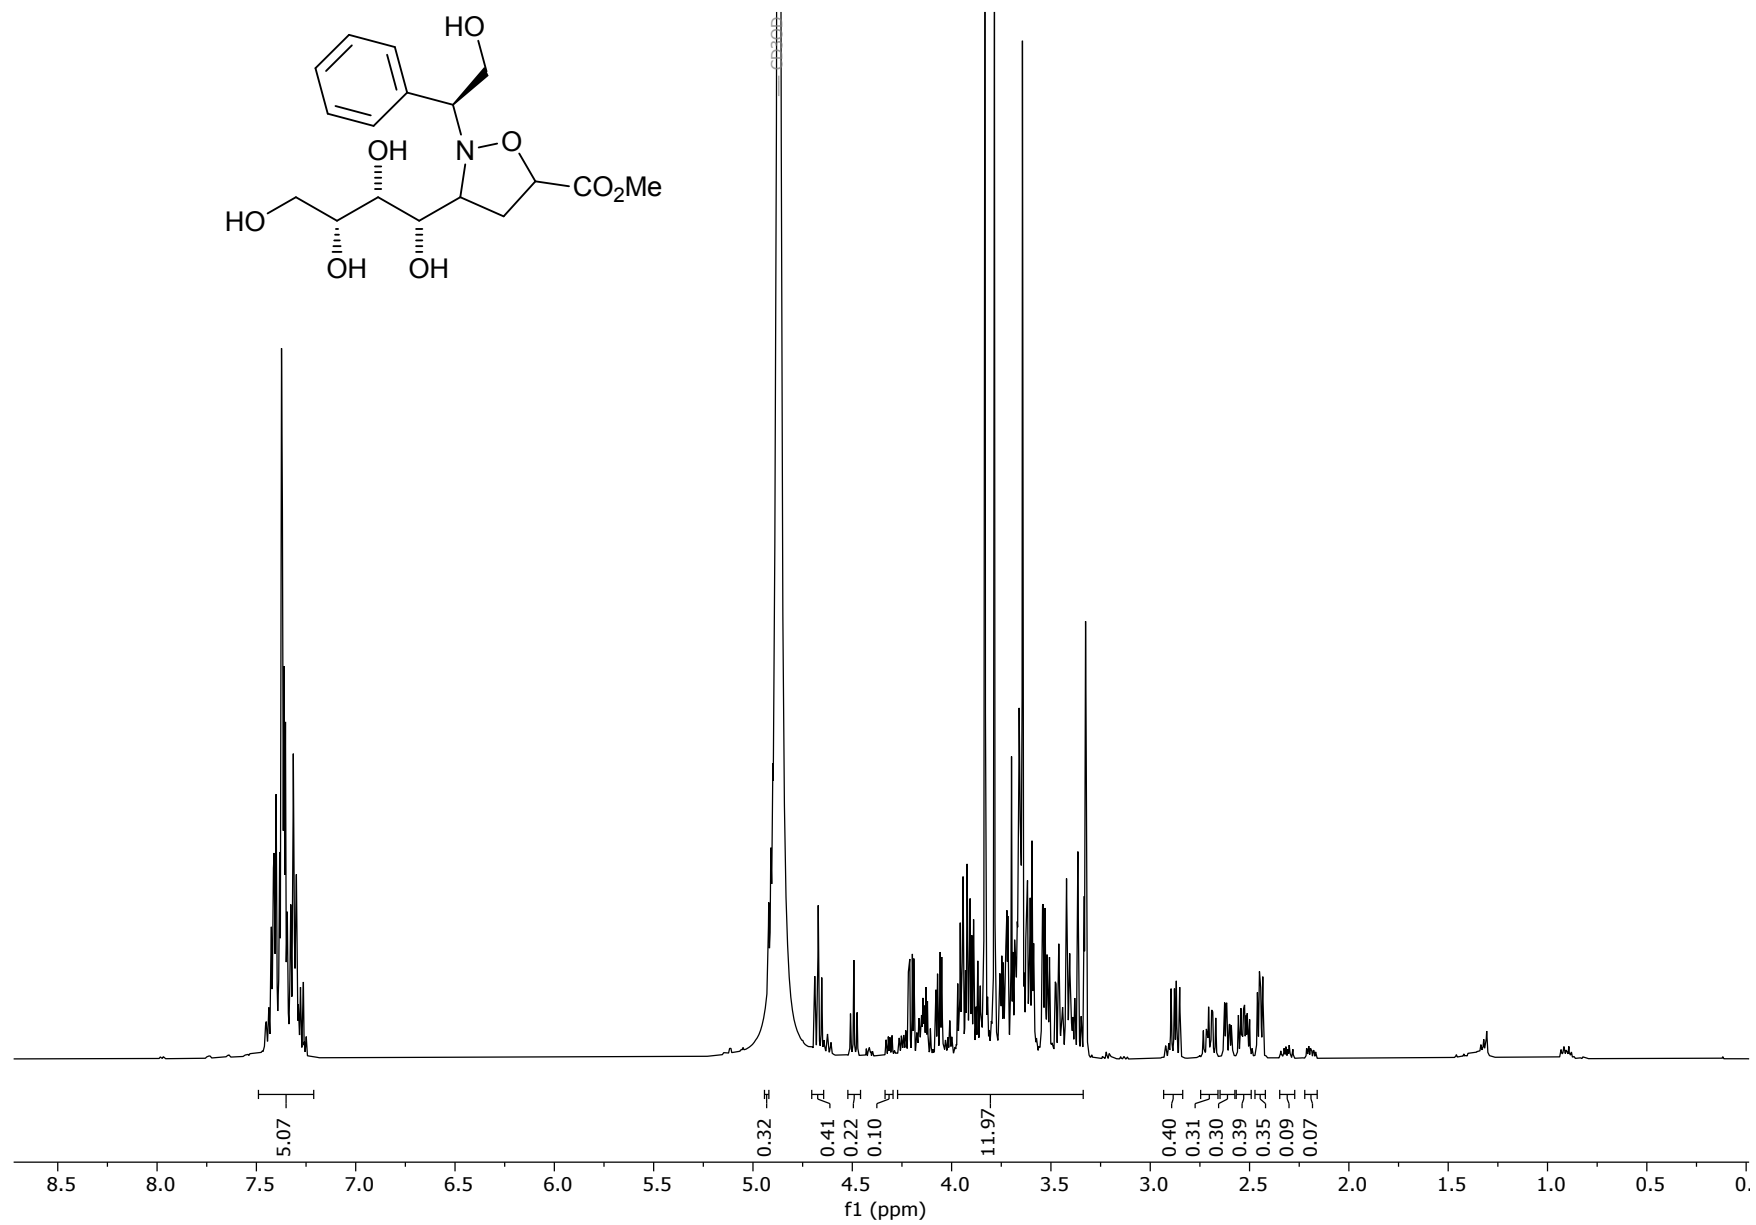

<sup>13</sup>C-NMR spectrum of 10' (CD<sub>3</sub>OD)

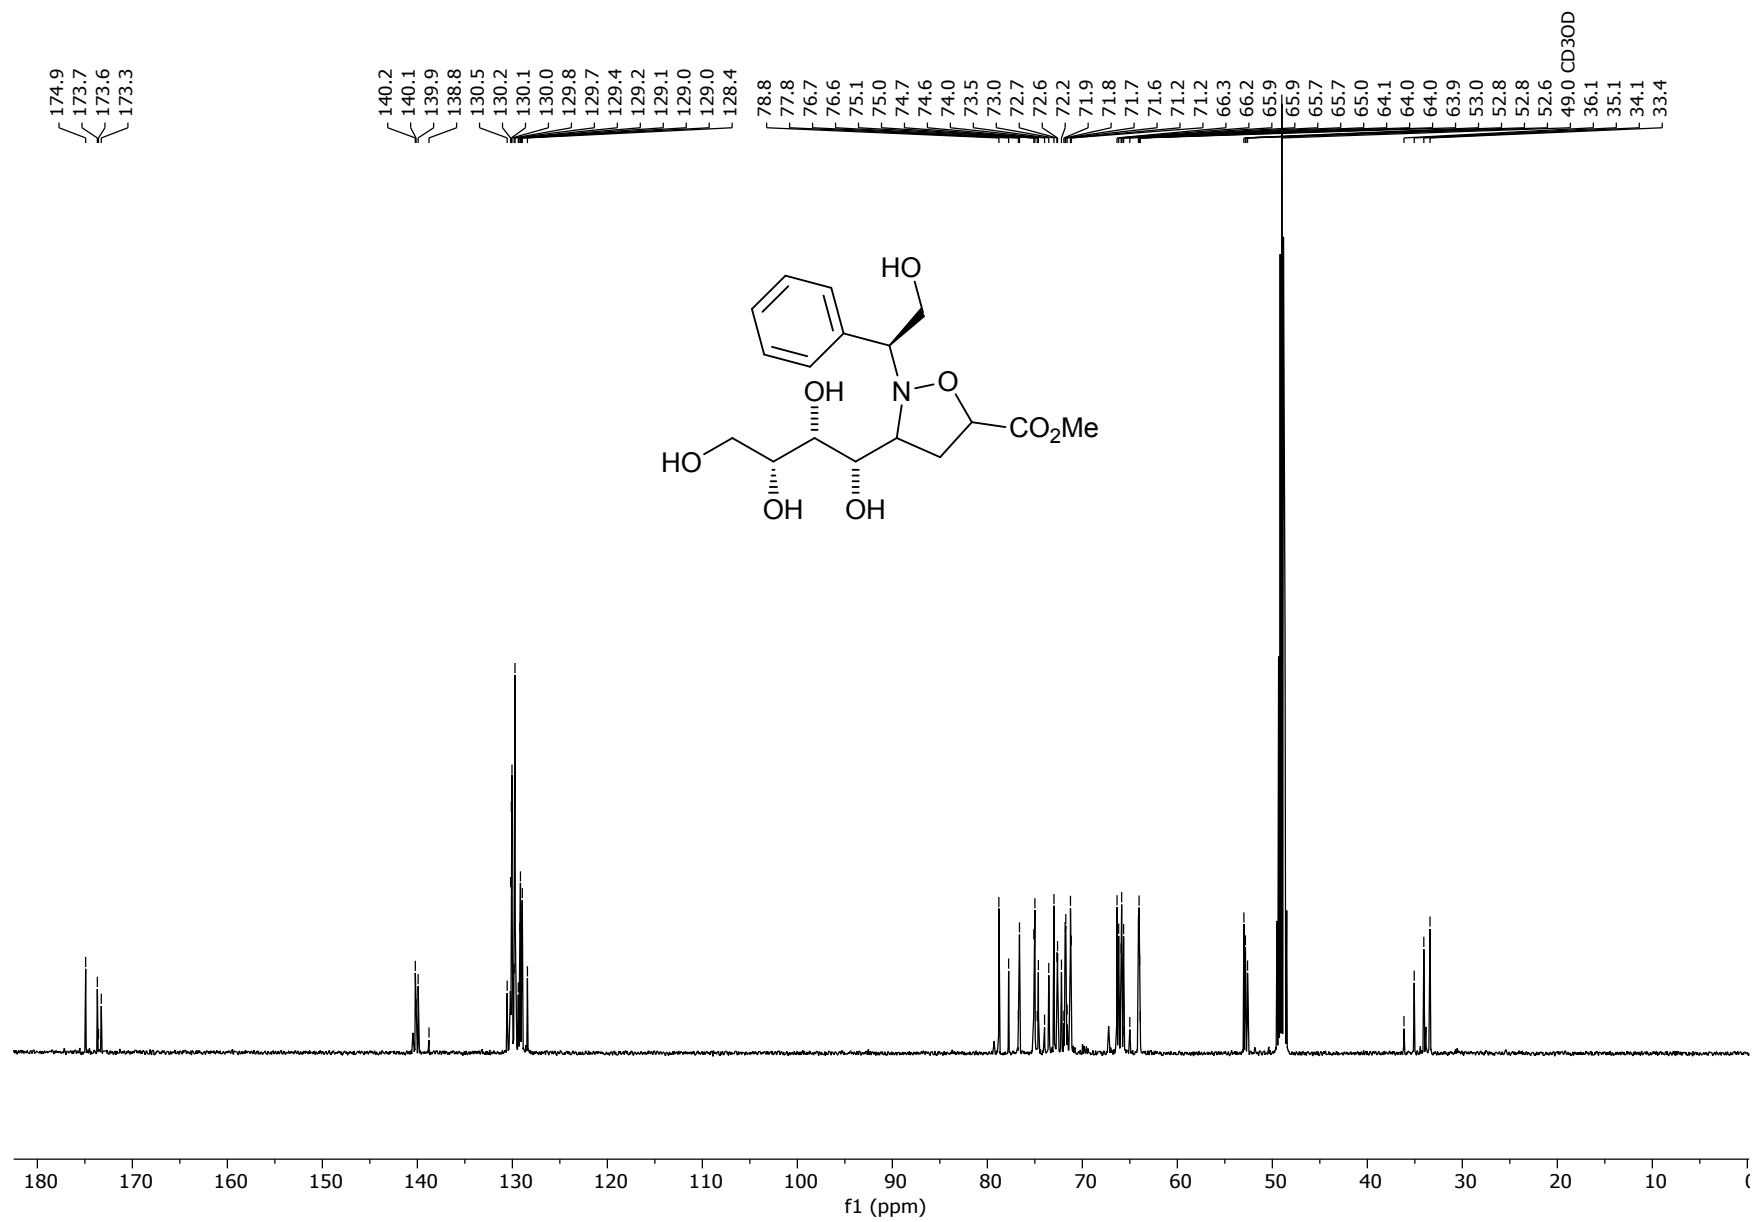

<sup>1</sup>H-NMR spectrum of 10'' (CD<sub>3</sub>OD)

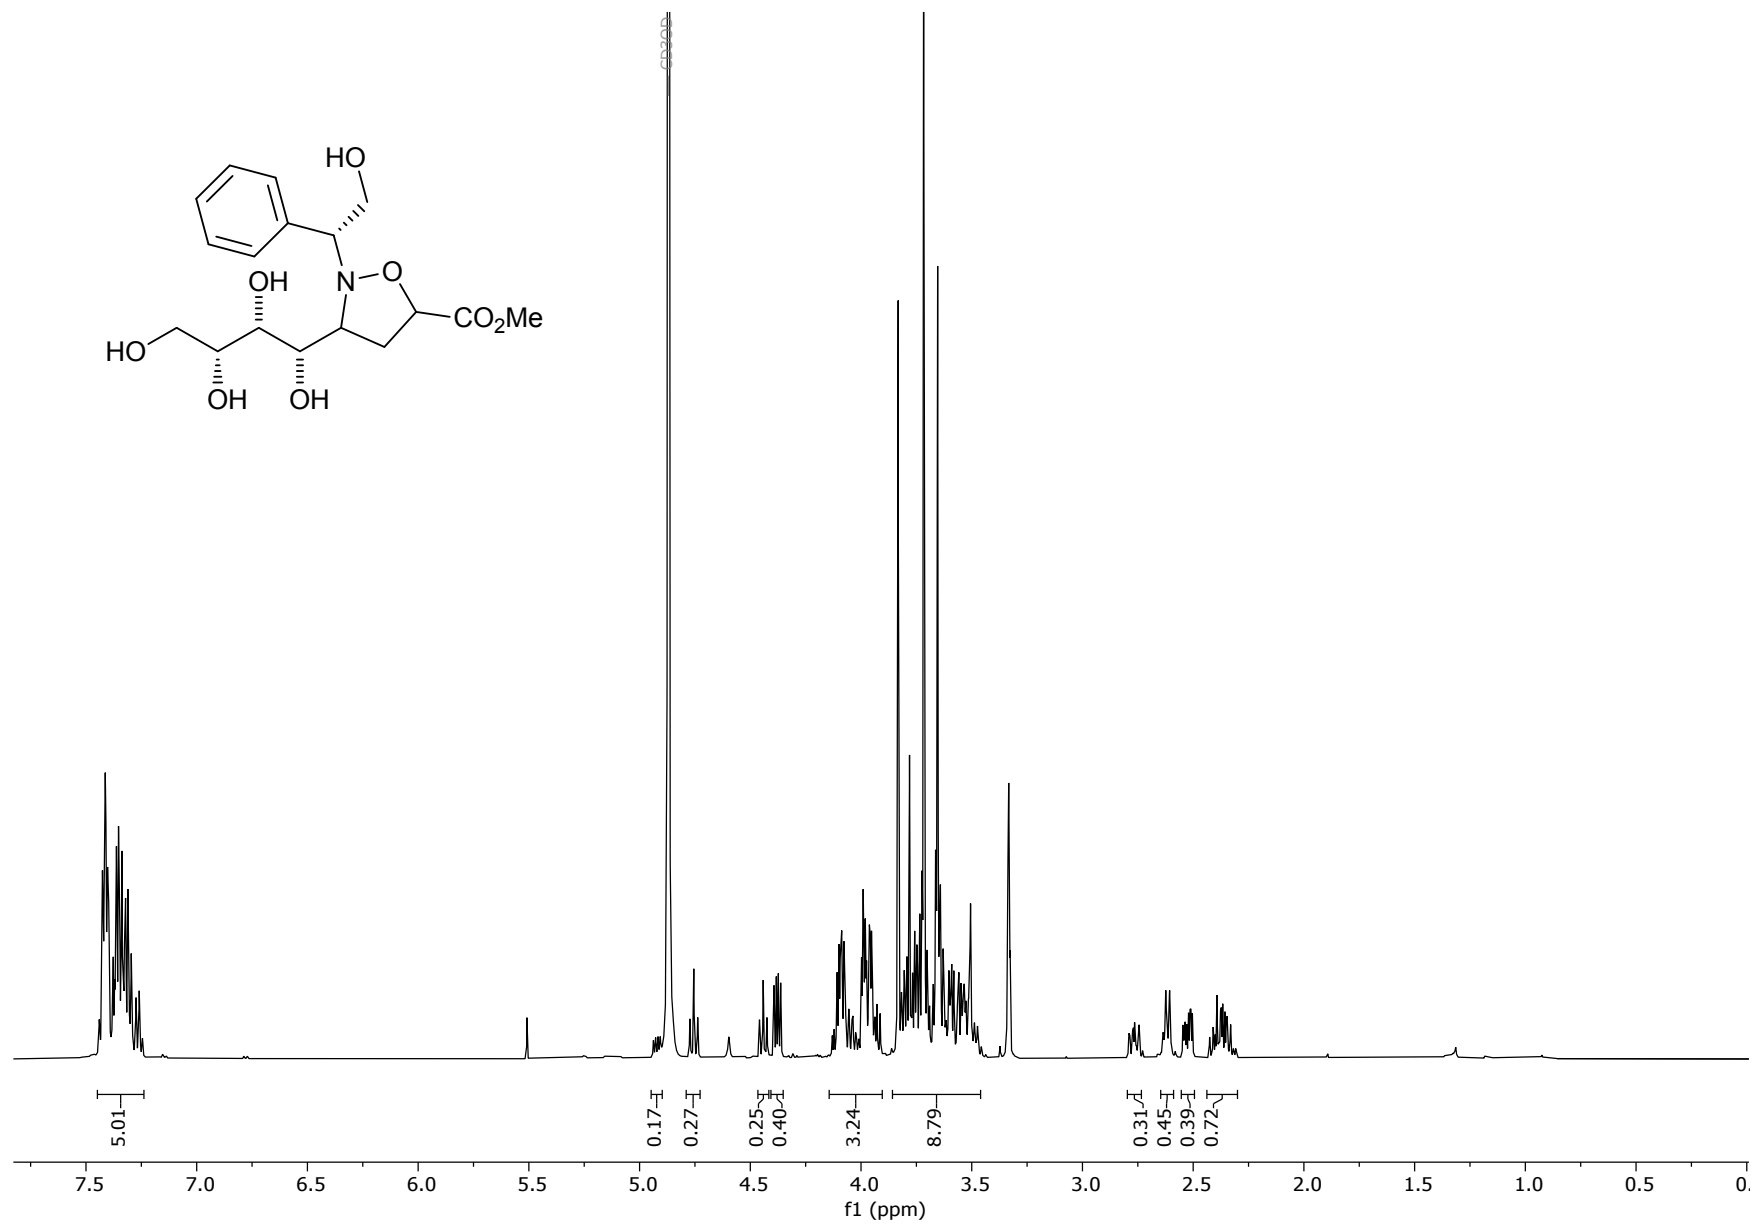

<sup>13</sup>C-NMR spectrum of 10'' (CD<sub>3</sub>OD)

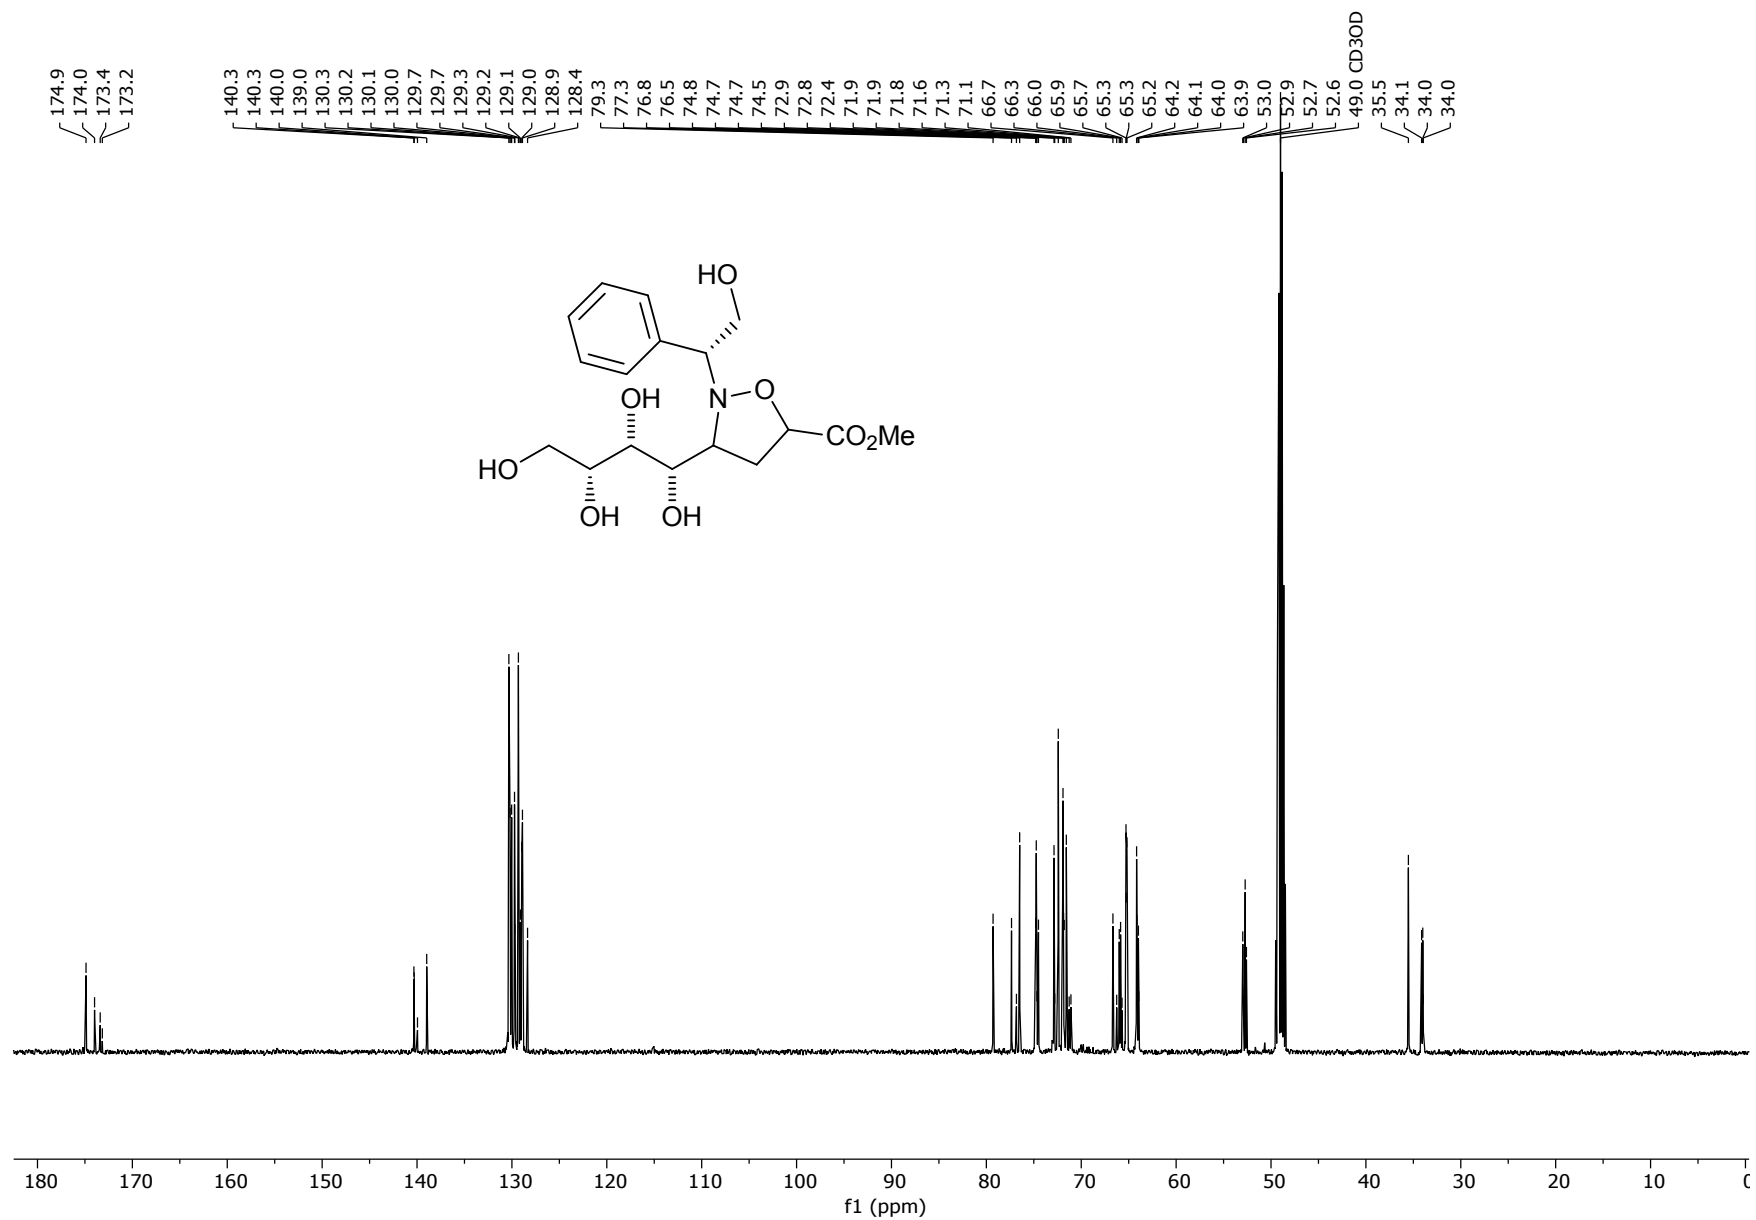



<sup>1</sup>H-NMR spectrum of 14 (CD<sub>3</sub>OD)

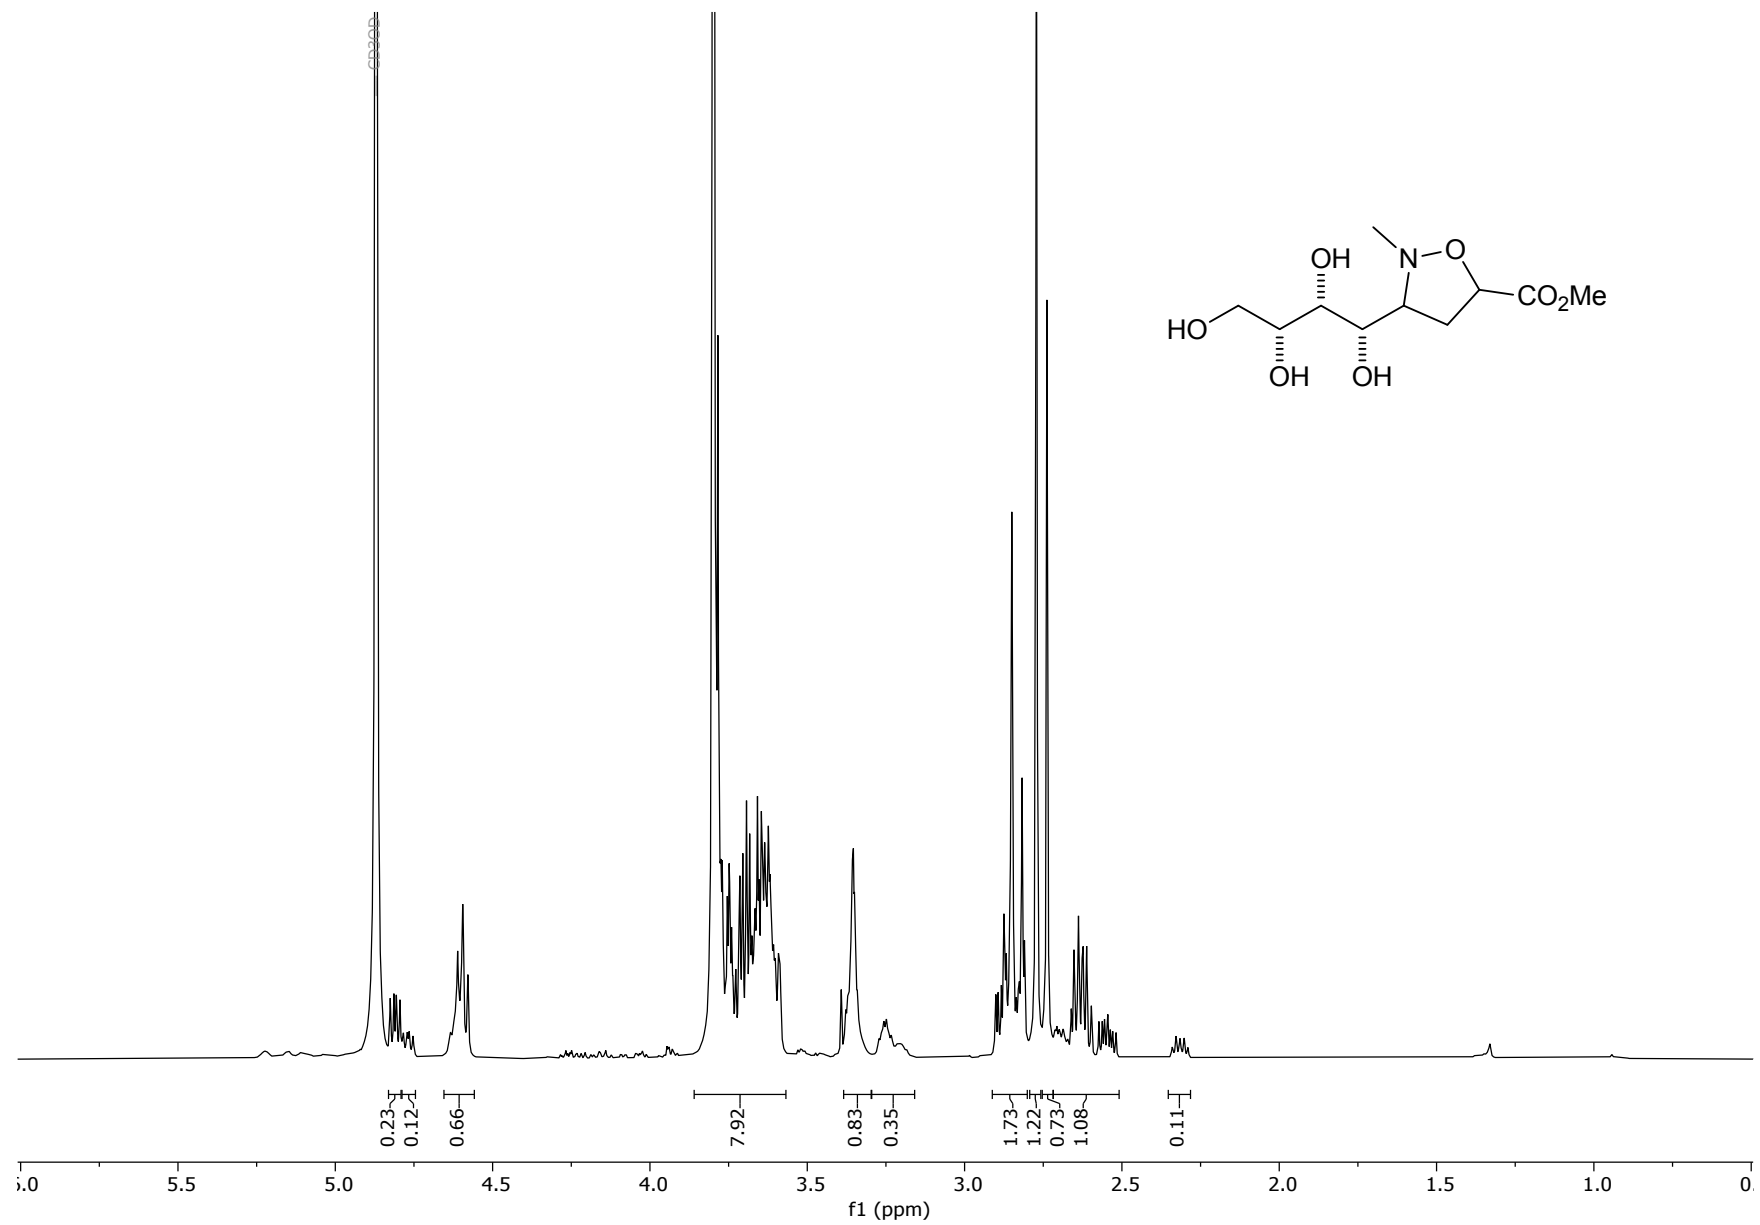

<sup>13</sup>C-NMR spectrum of 14 (CD<sub>3</sub>OD)

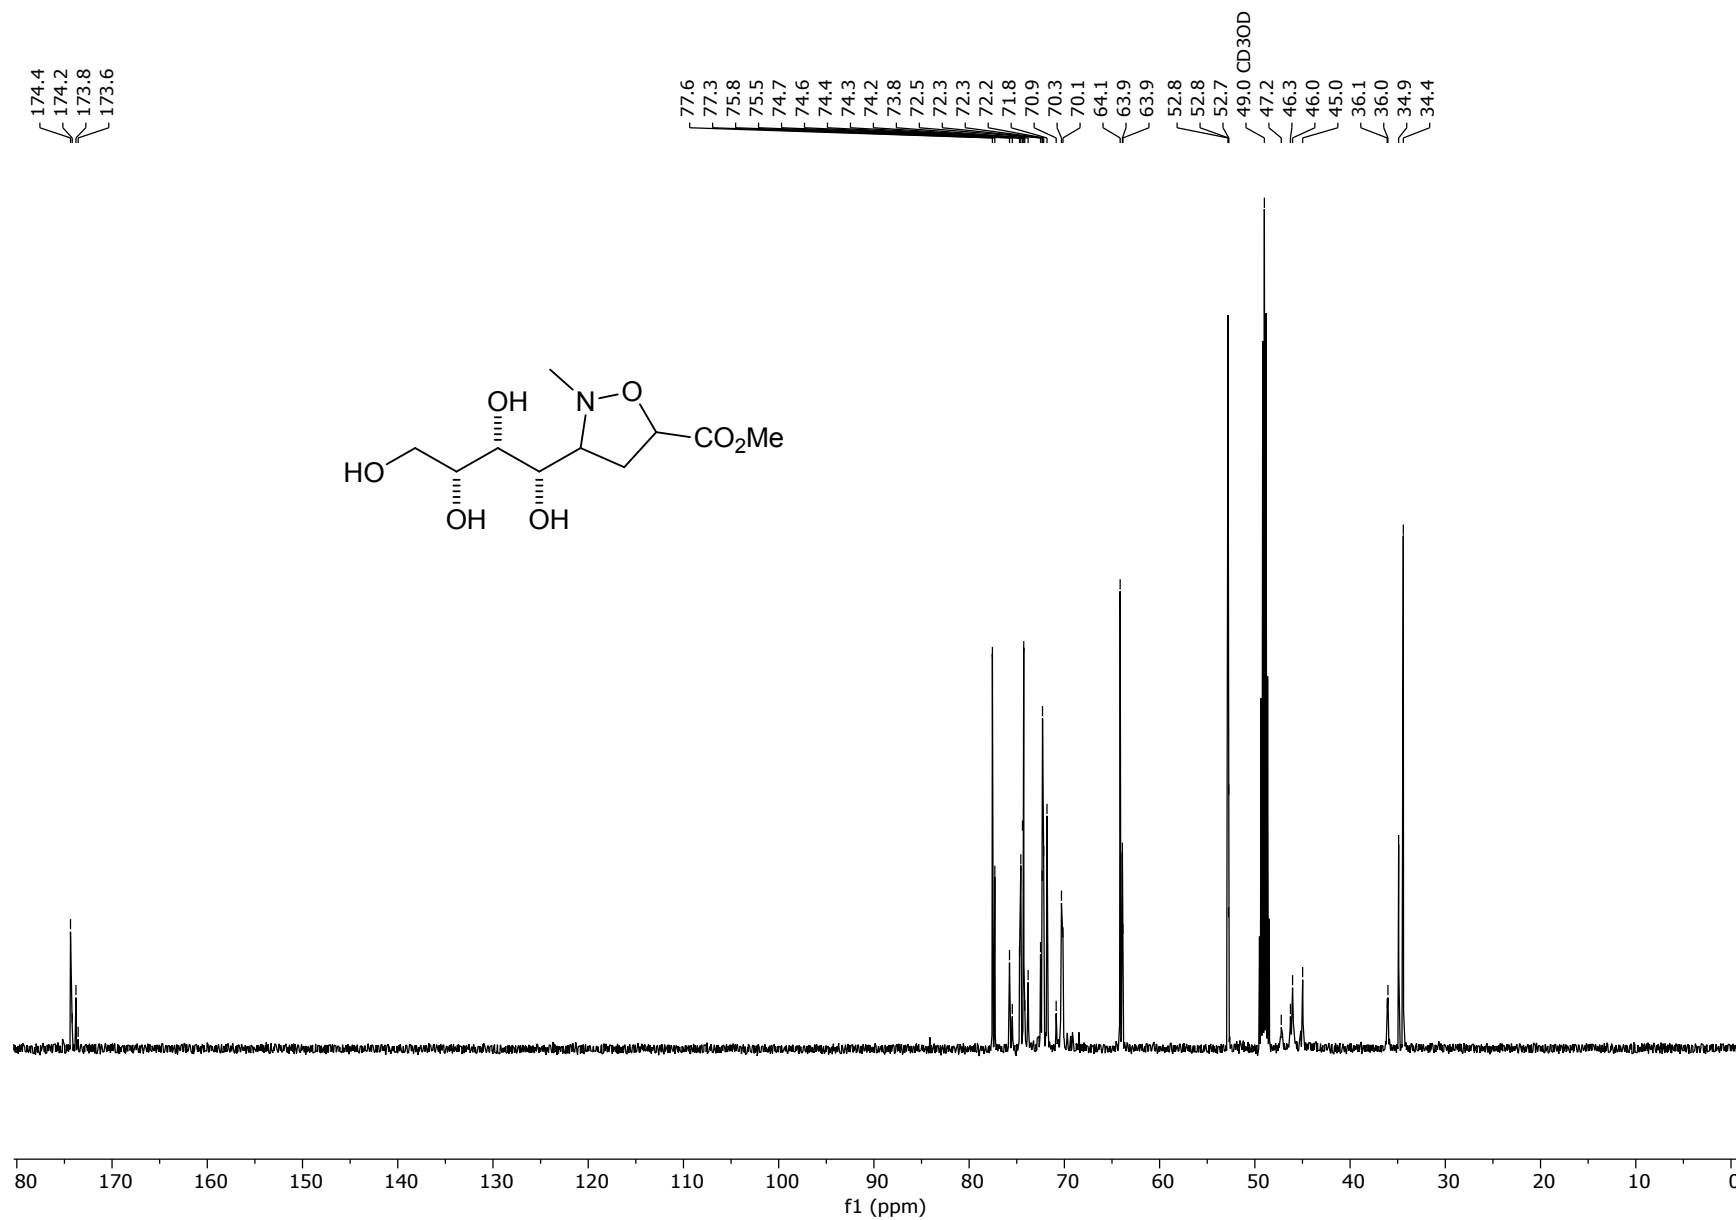

<sup>1</sup>H-NMR spectrum of 15 (CD<sub>3</sub>OD)

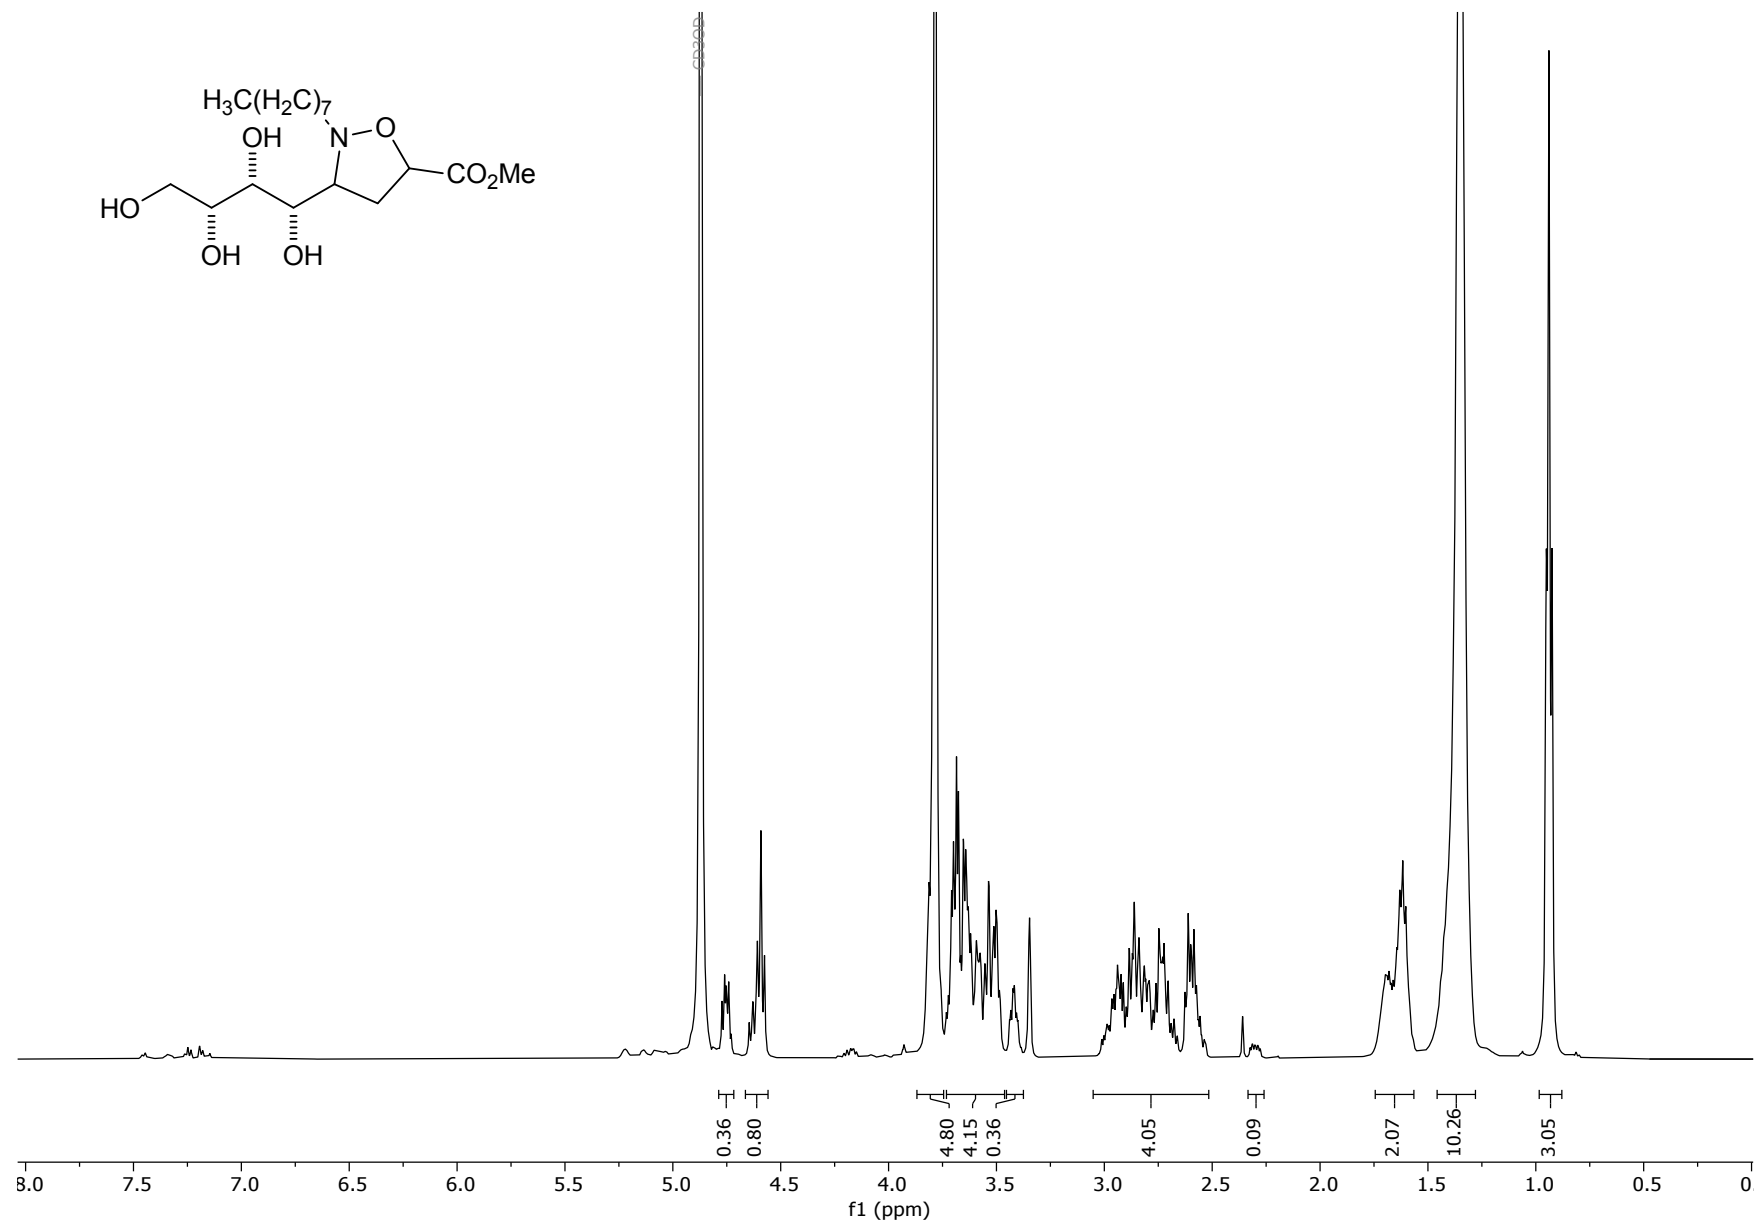

**<sup>13</sup>C-NMR spectrum of 15 (CD<sub>3</sub>OD)**

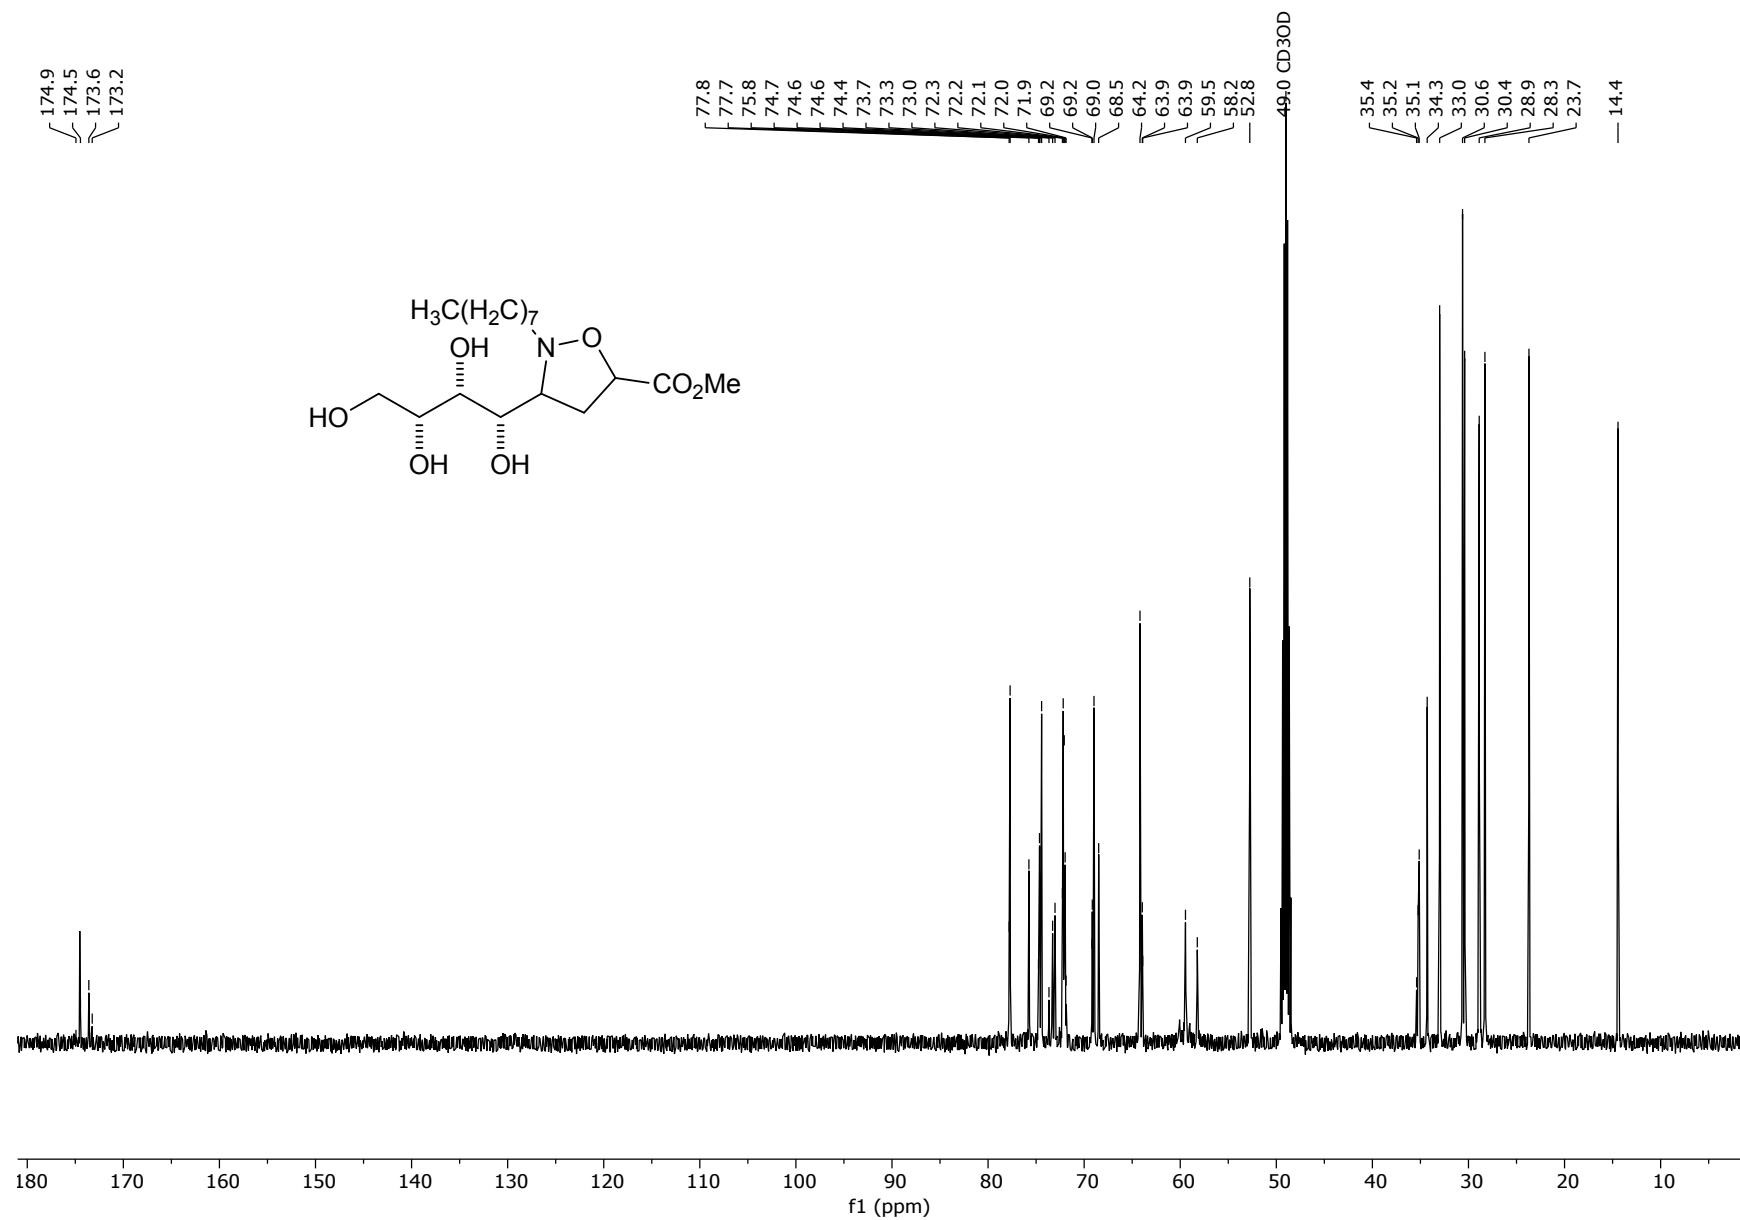

<sup>1</sup>H-NMR spectrum of 16 (CD<sub>3</sub>OD)

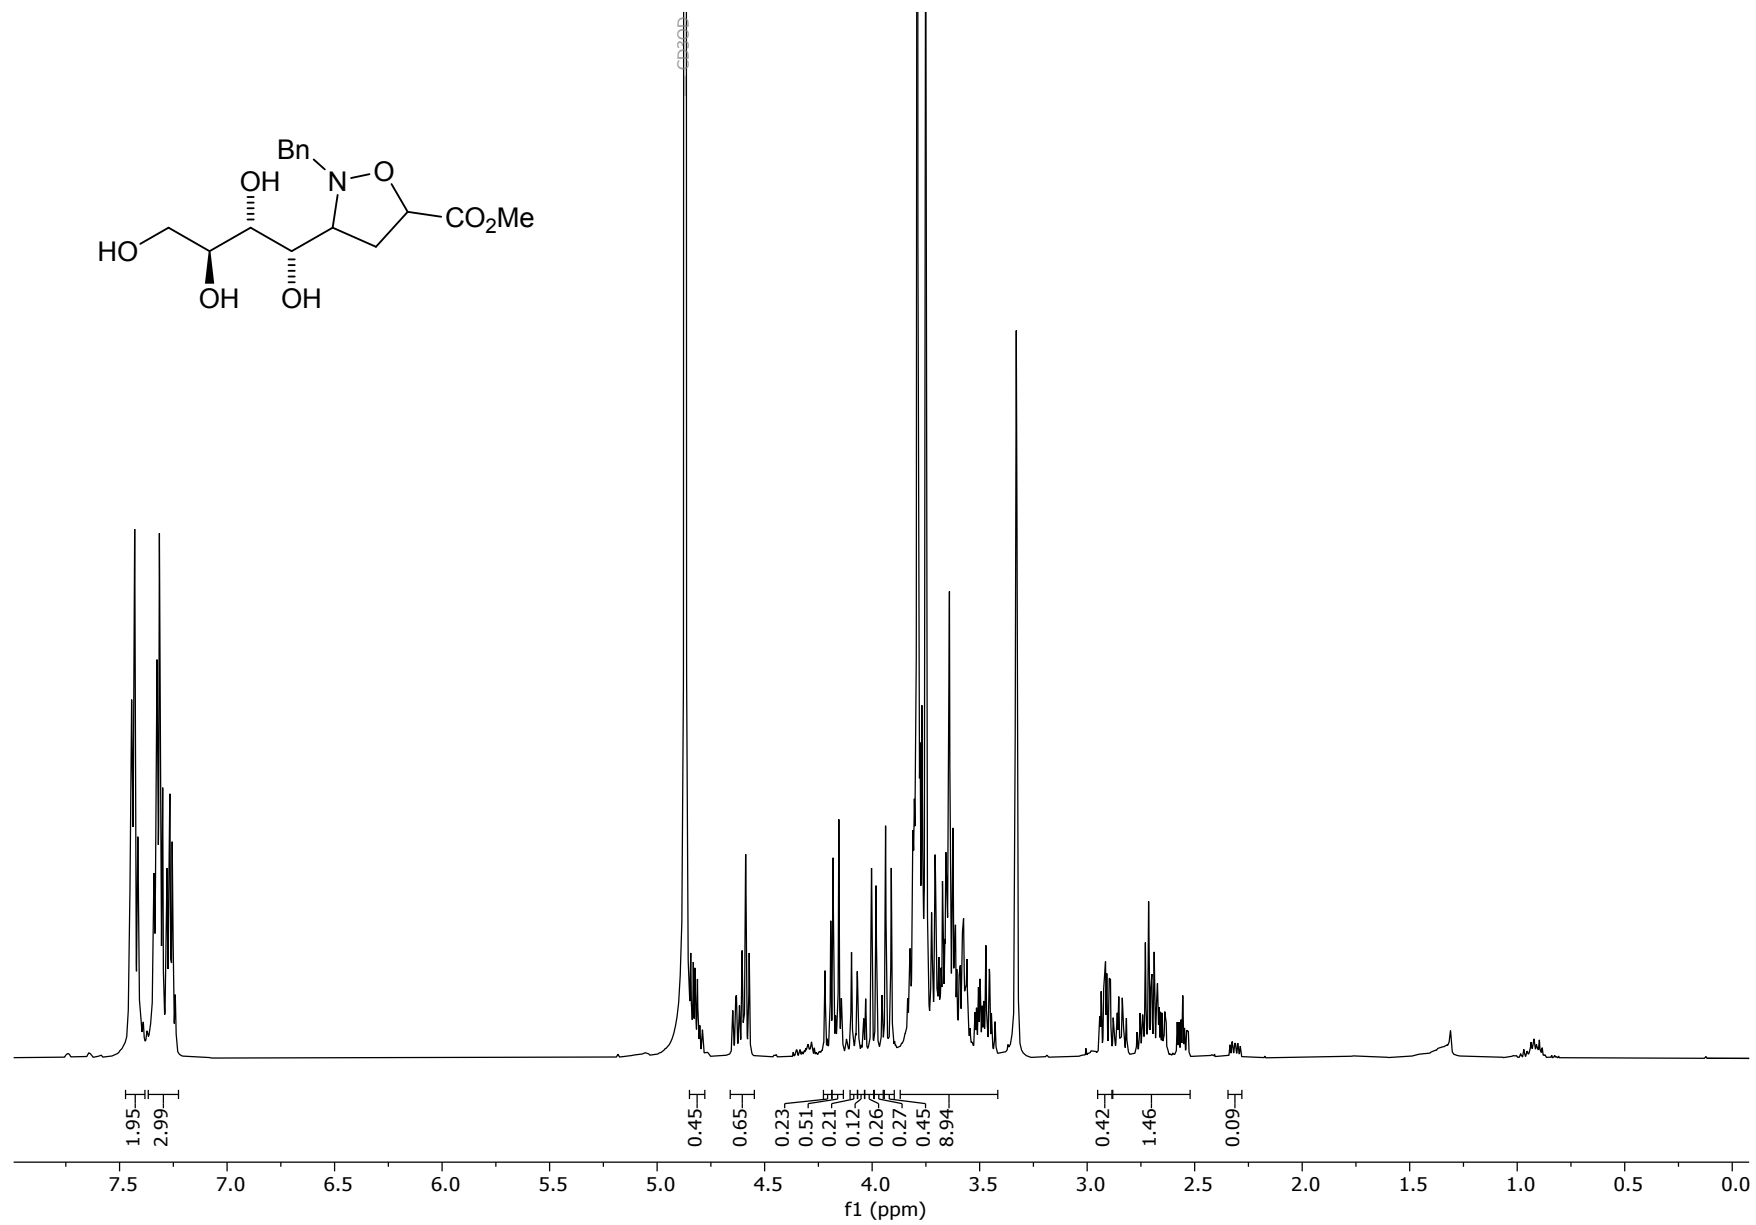

<sup>13</sup>C-NMR spectrum of 16 (CD<sub>3</sub>OD)

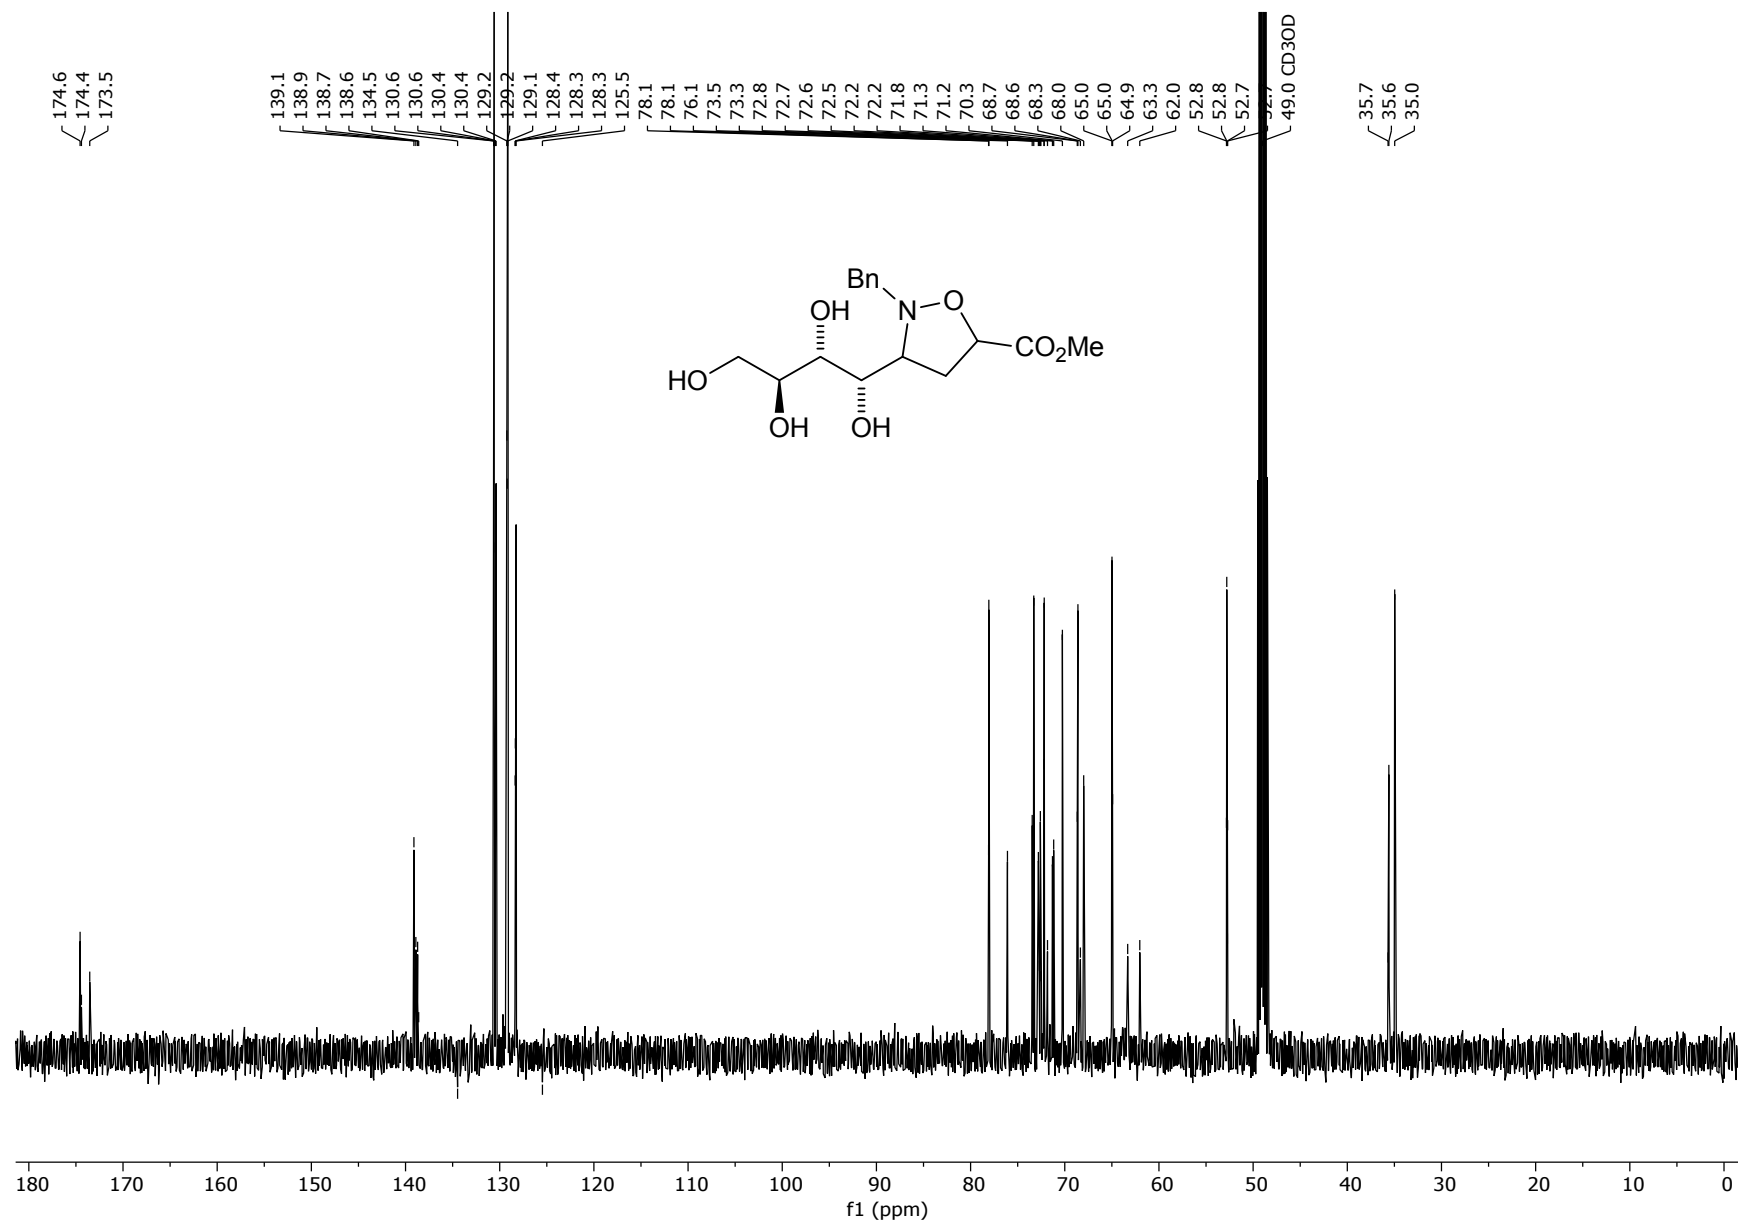

<sup>1</sup>H-NMR spectrum of 17 (CD<sub>3</sub>OD)

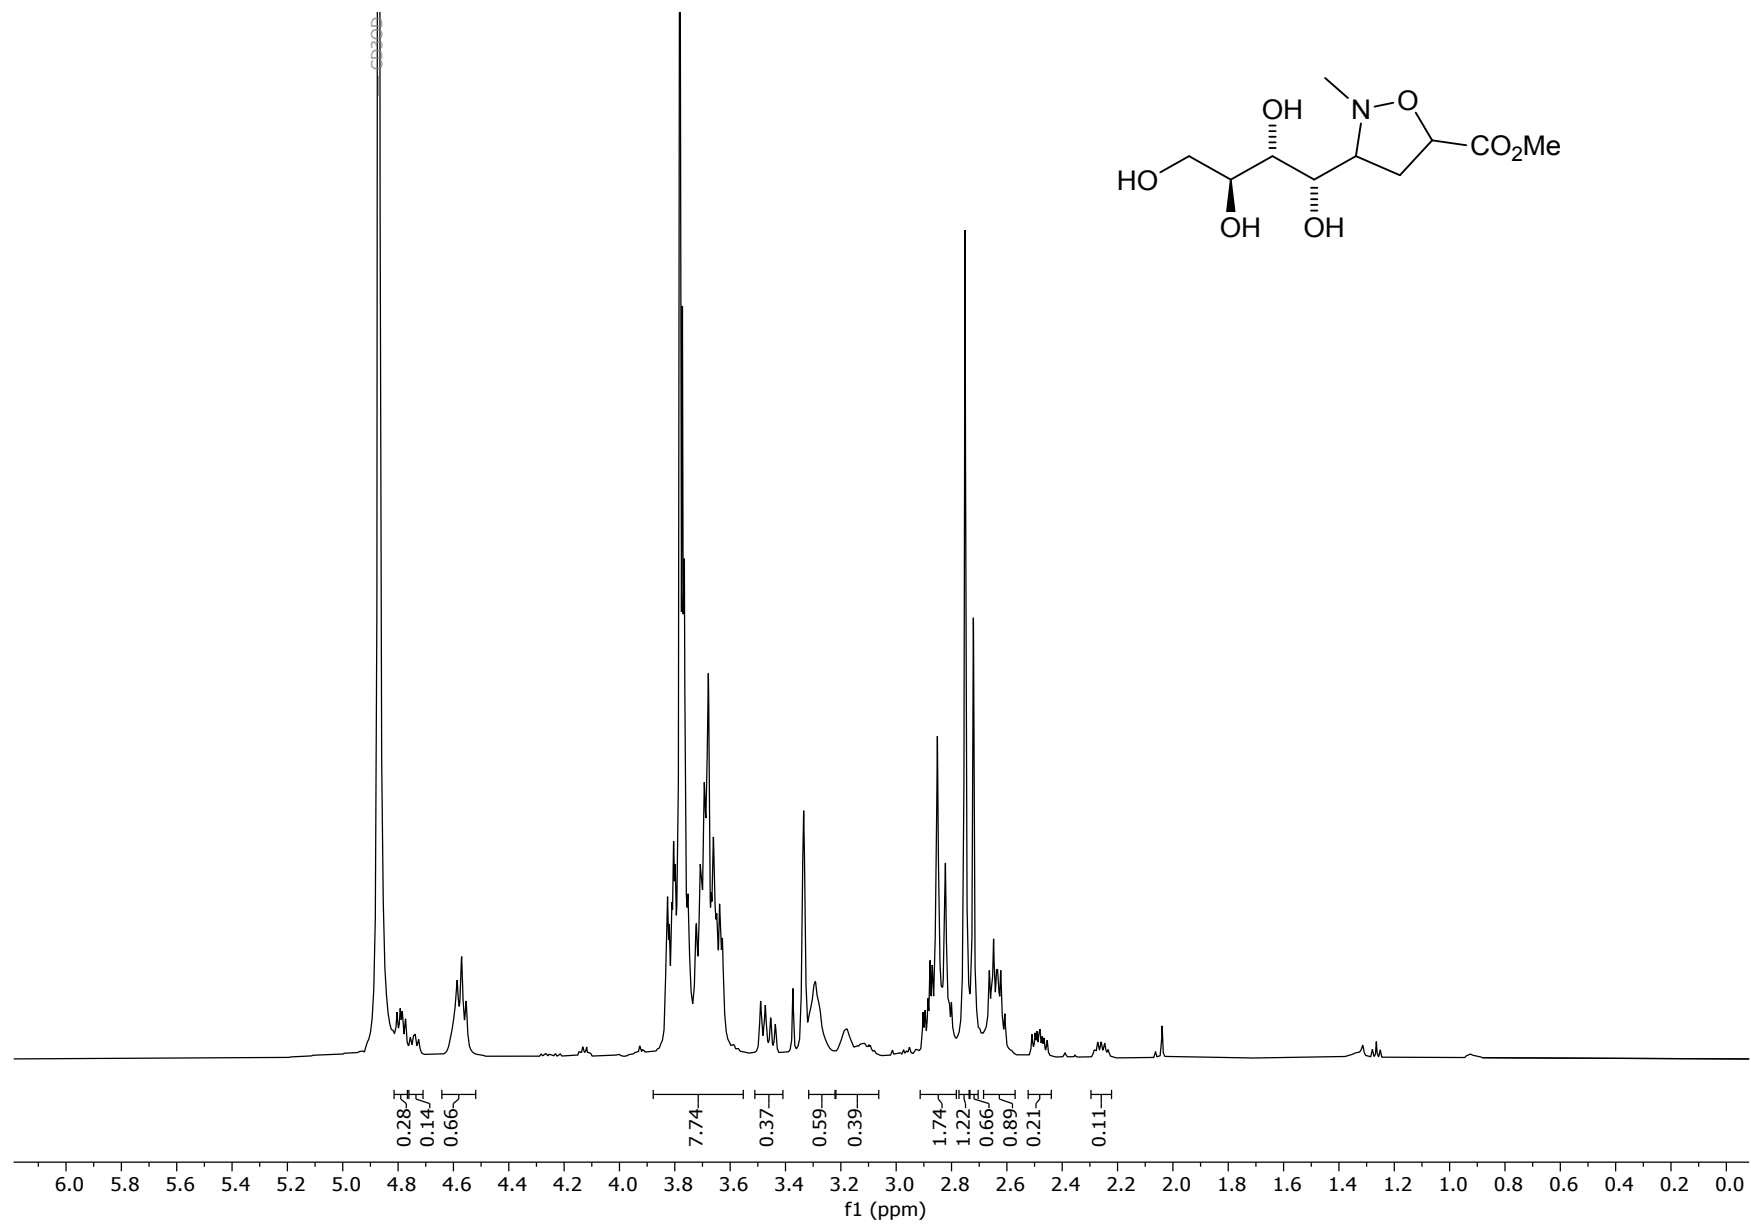

<sup>13</sup>C-NMR spectrum of 17 (CD<sub>3</sub>OD)

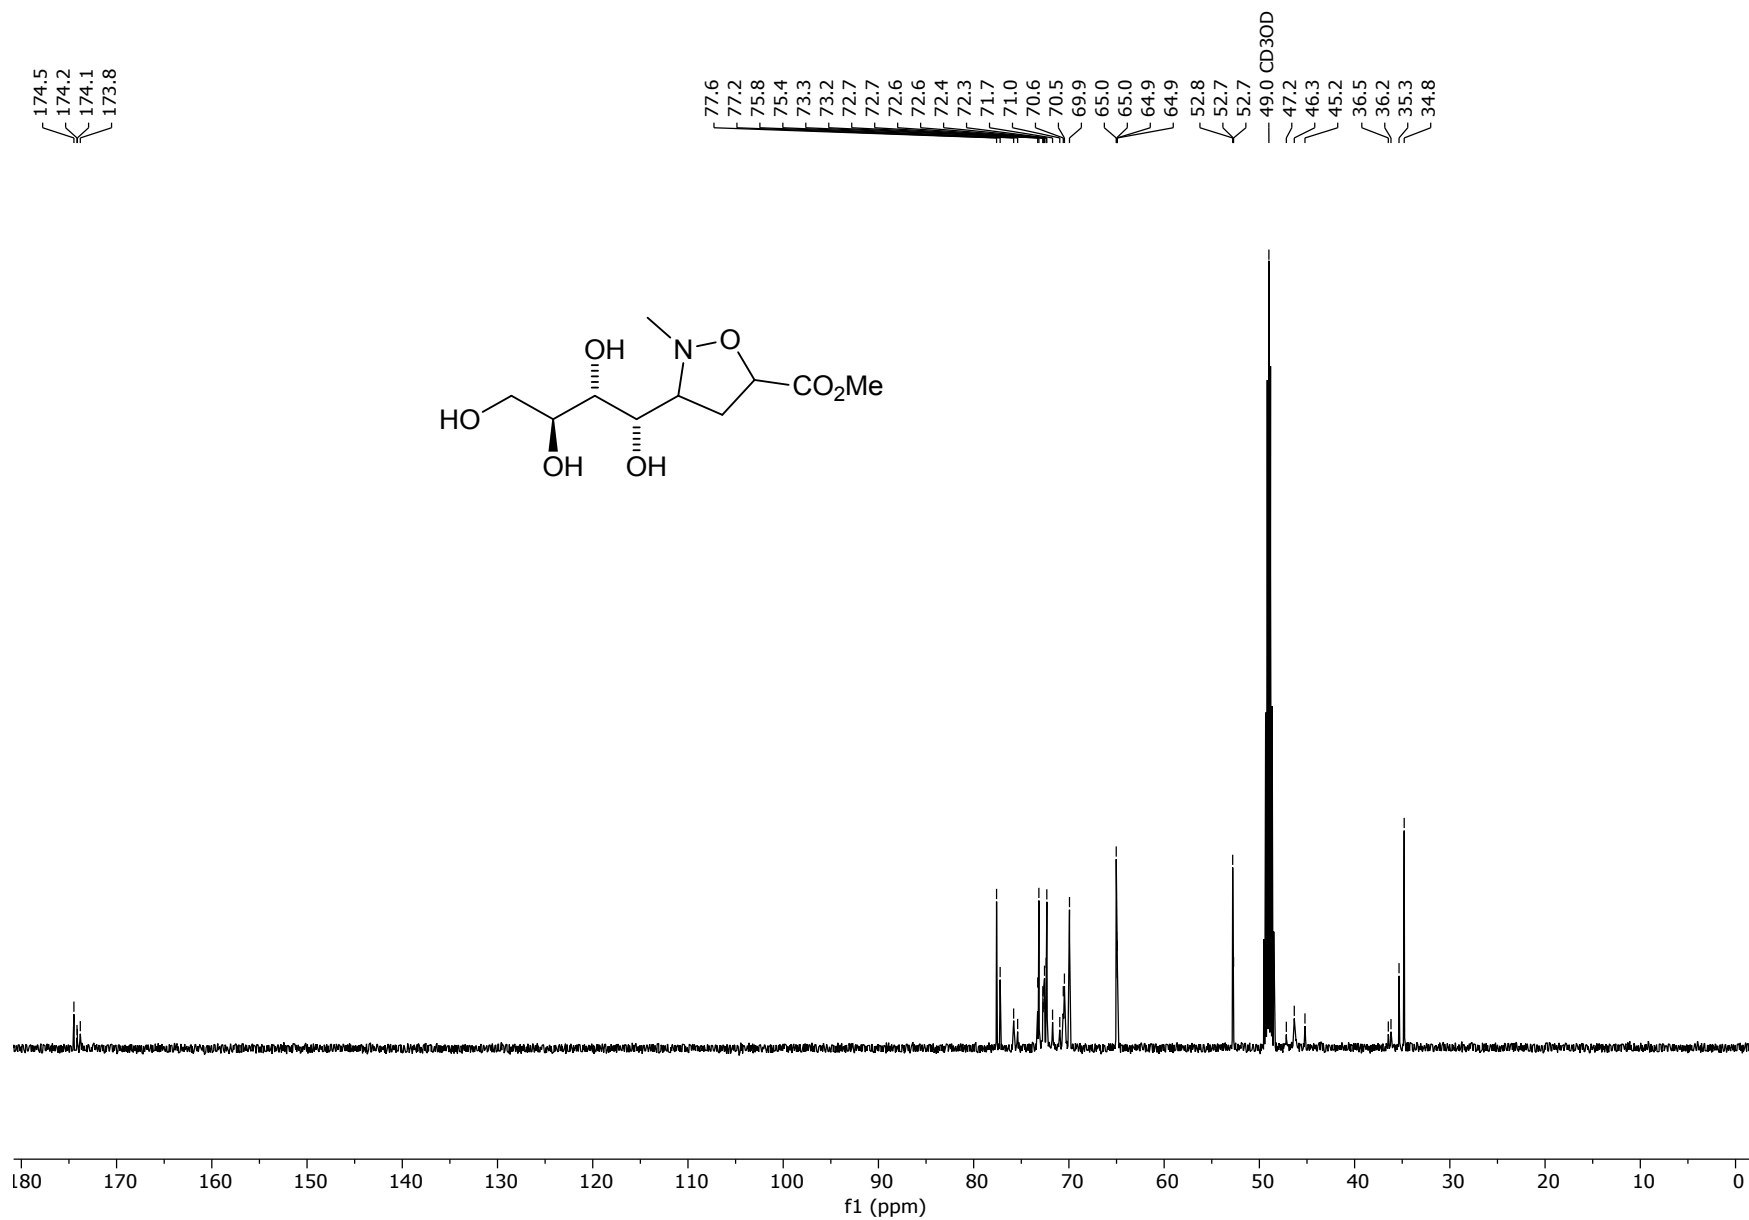



<sup>1</sup>H-NMR spectrum of 18 (CD<sub>3</sub>OD)

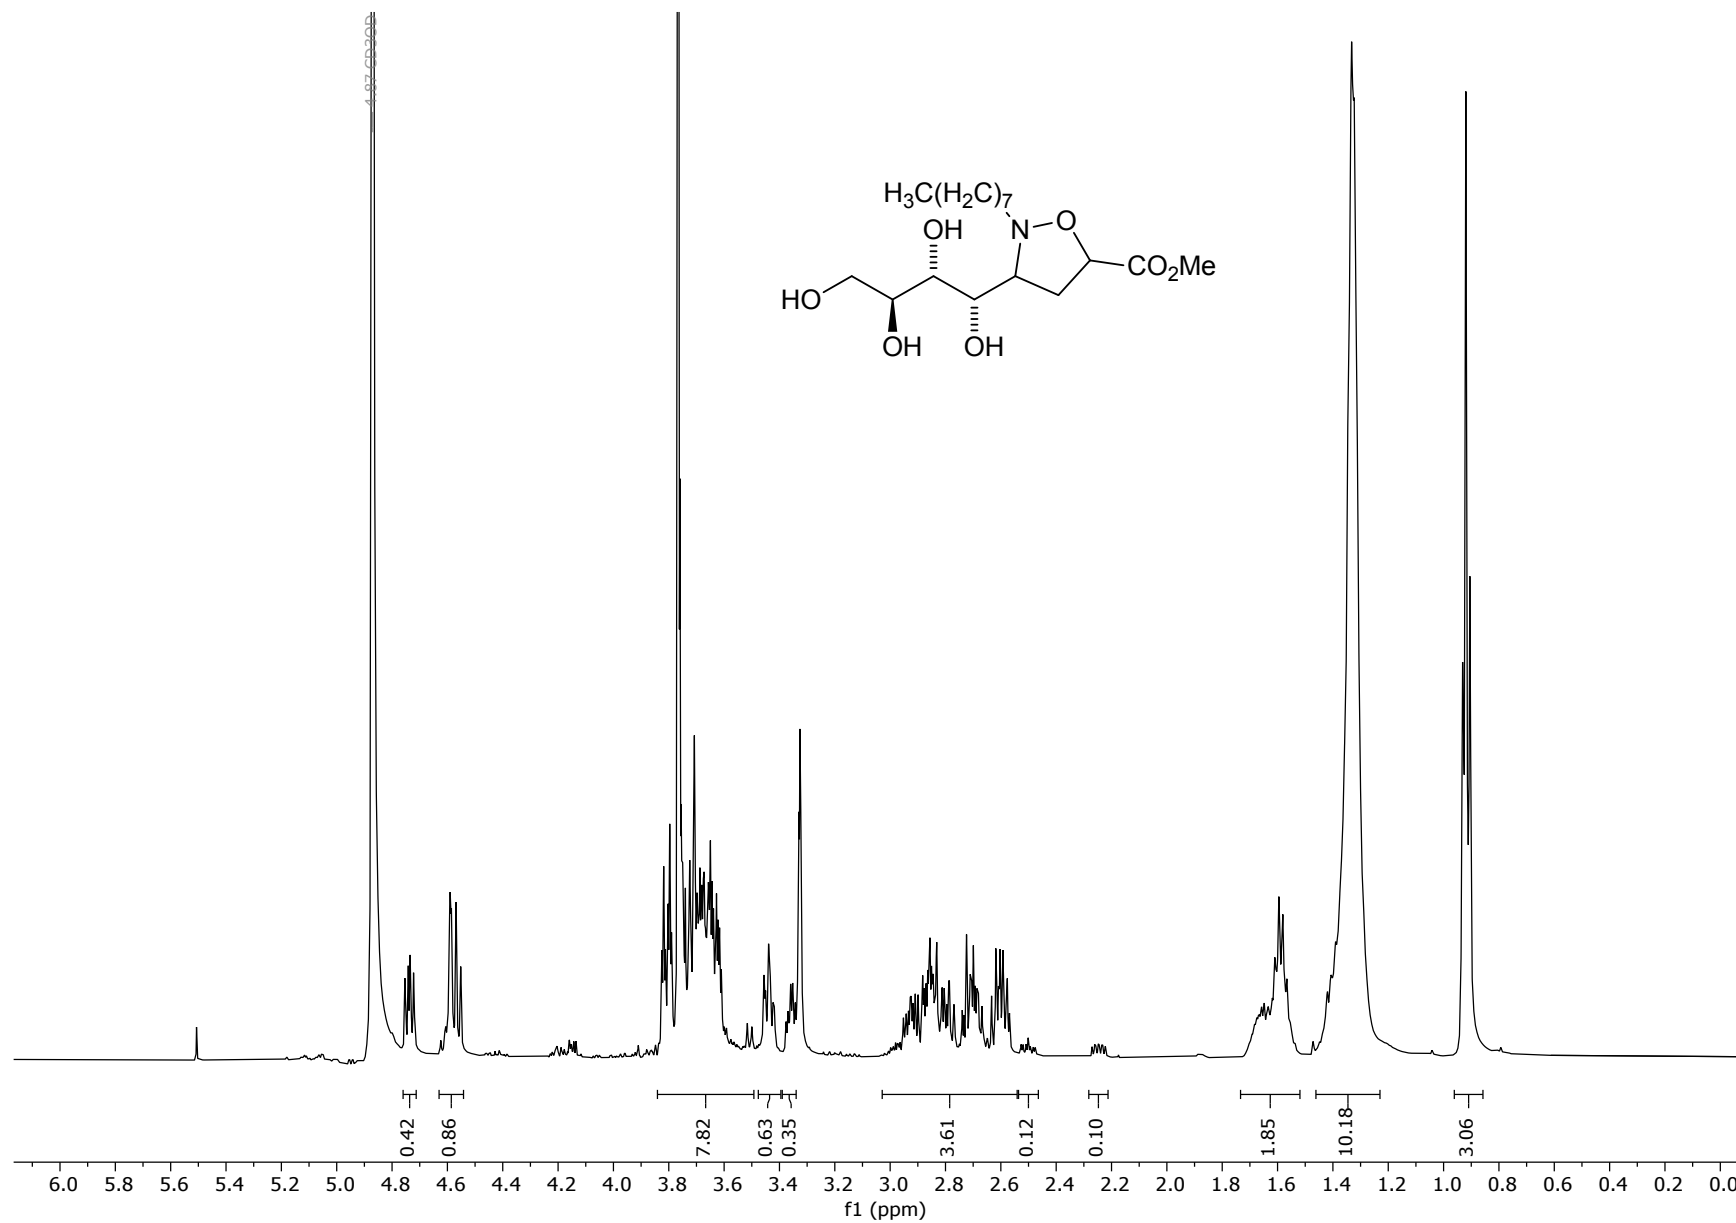

<sup>13</sup>C-NMR spectrum of 18 (CD<sub>3</sub>OD)

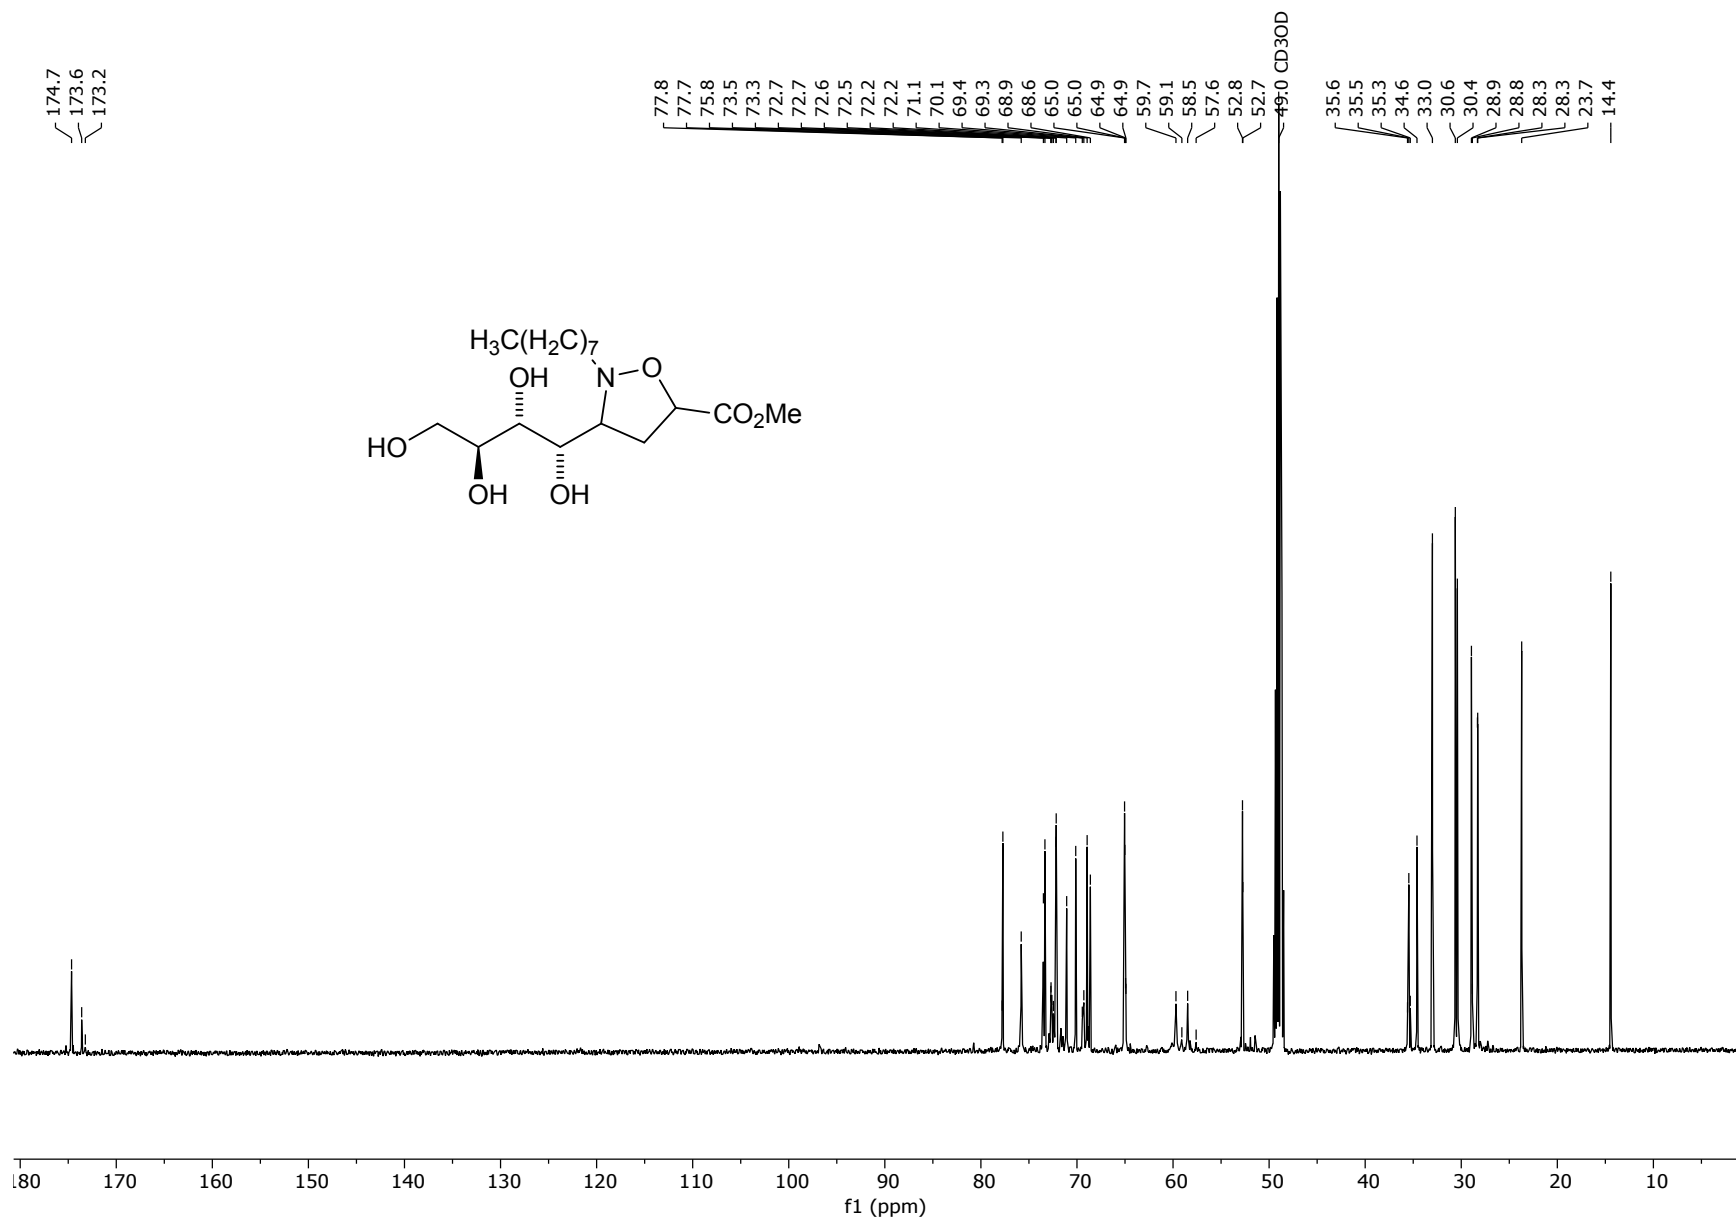

<sup>1</sup>H-NMR spectrum of 19 (CD<sub>3</sub>OD)

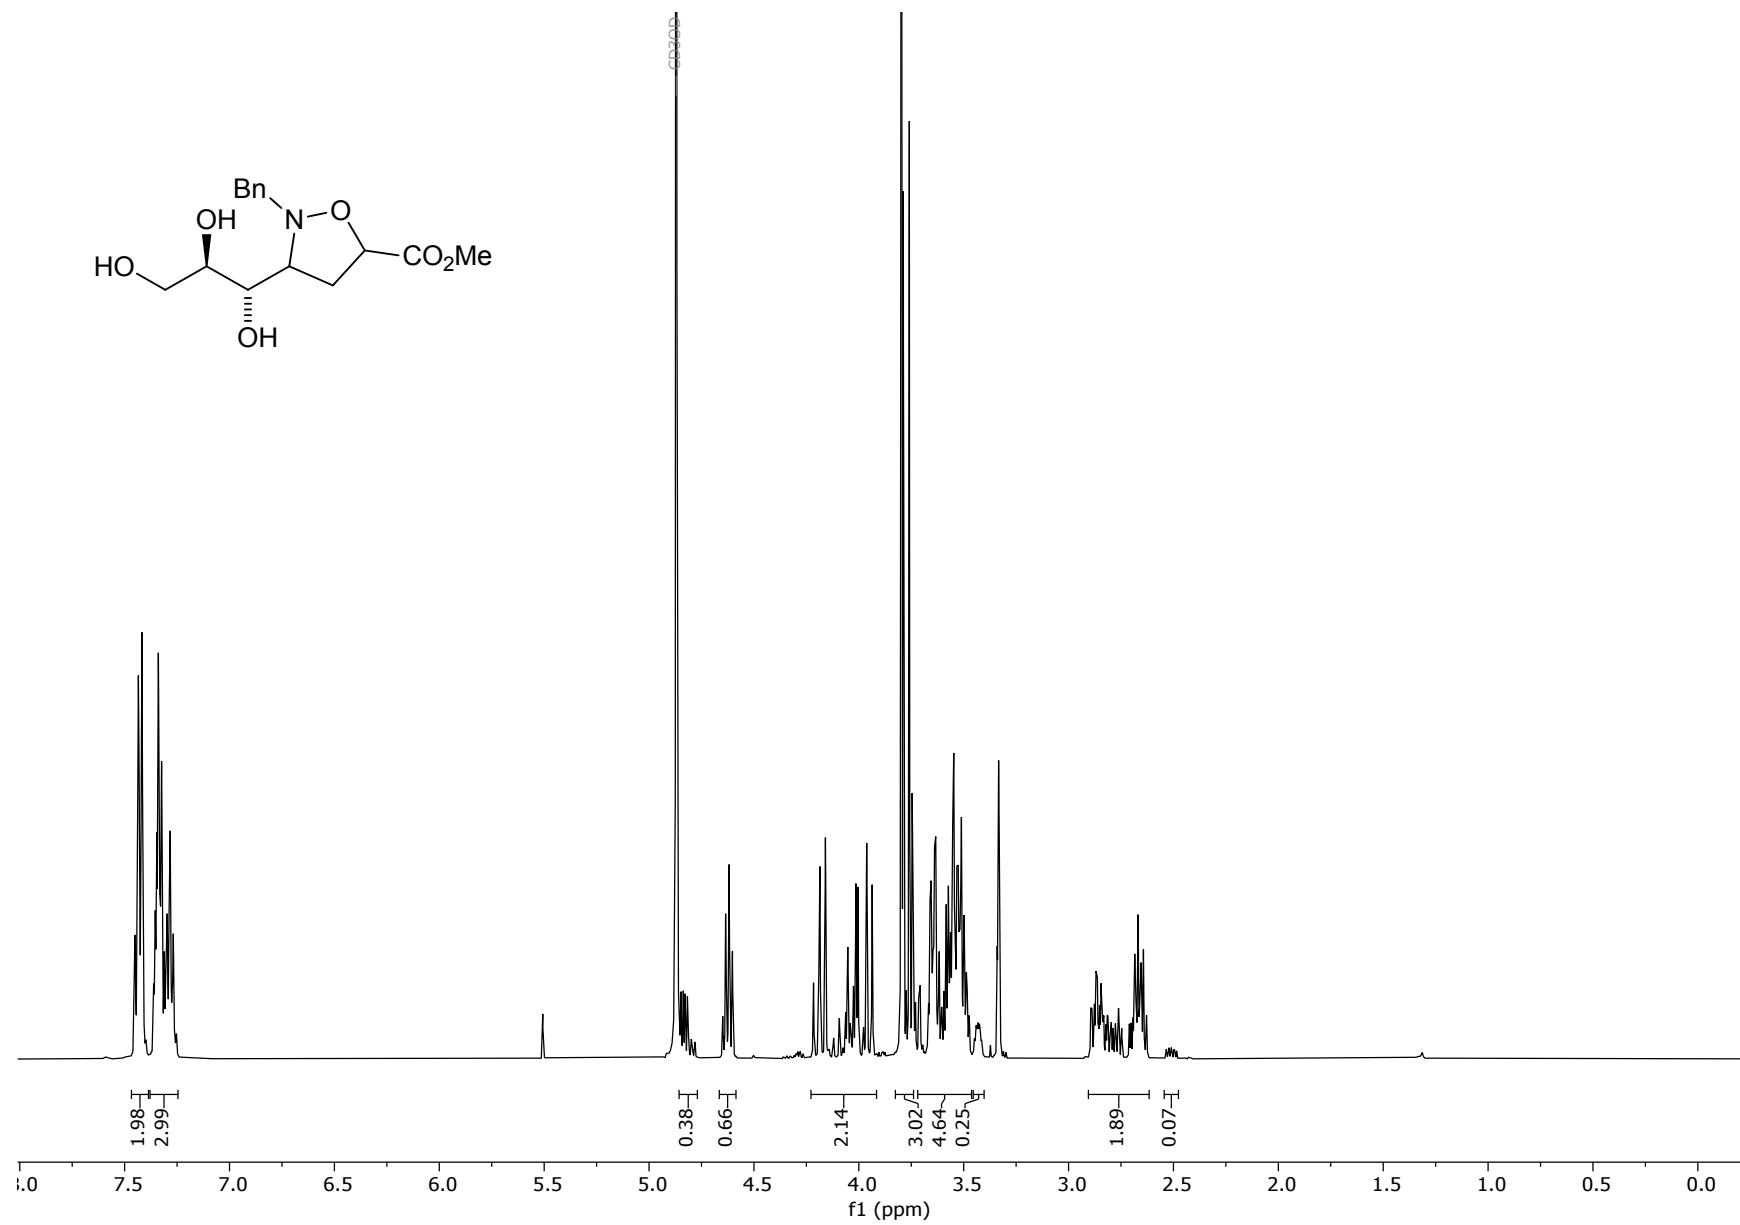

<sup>13</sup>C-NMR spectrum of 19 (CD<sub>3</sub>OD)

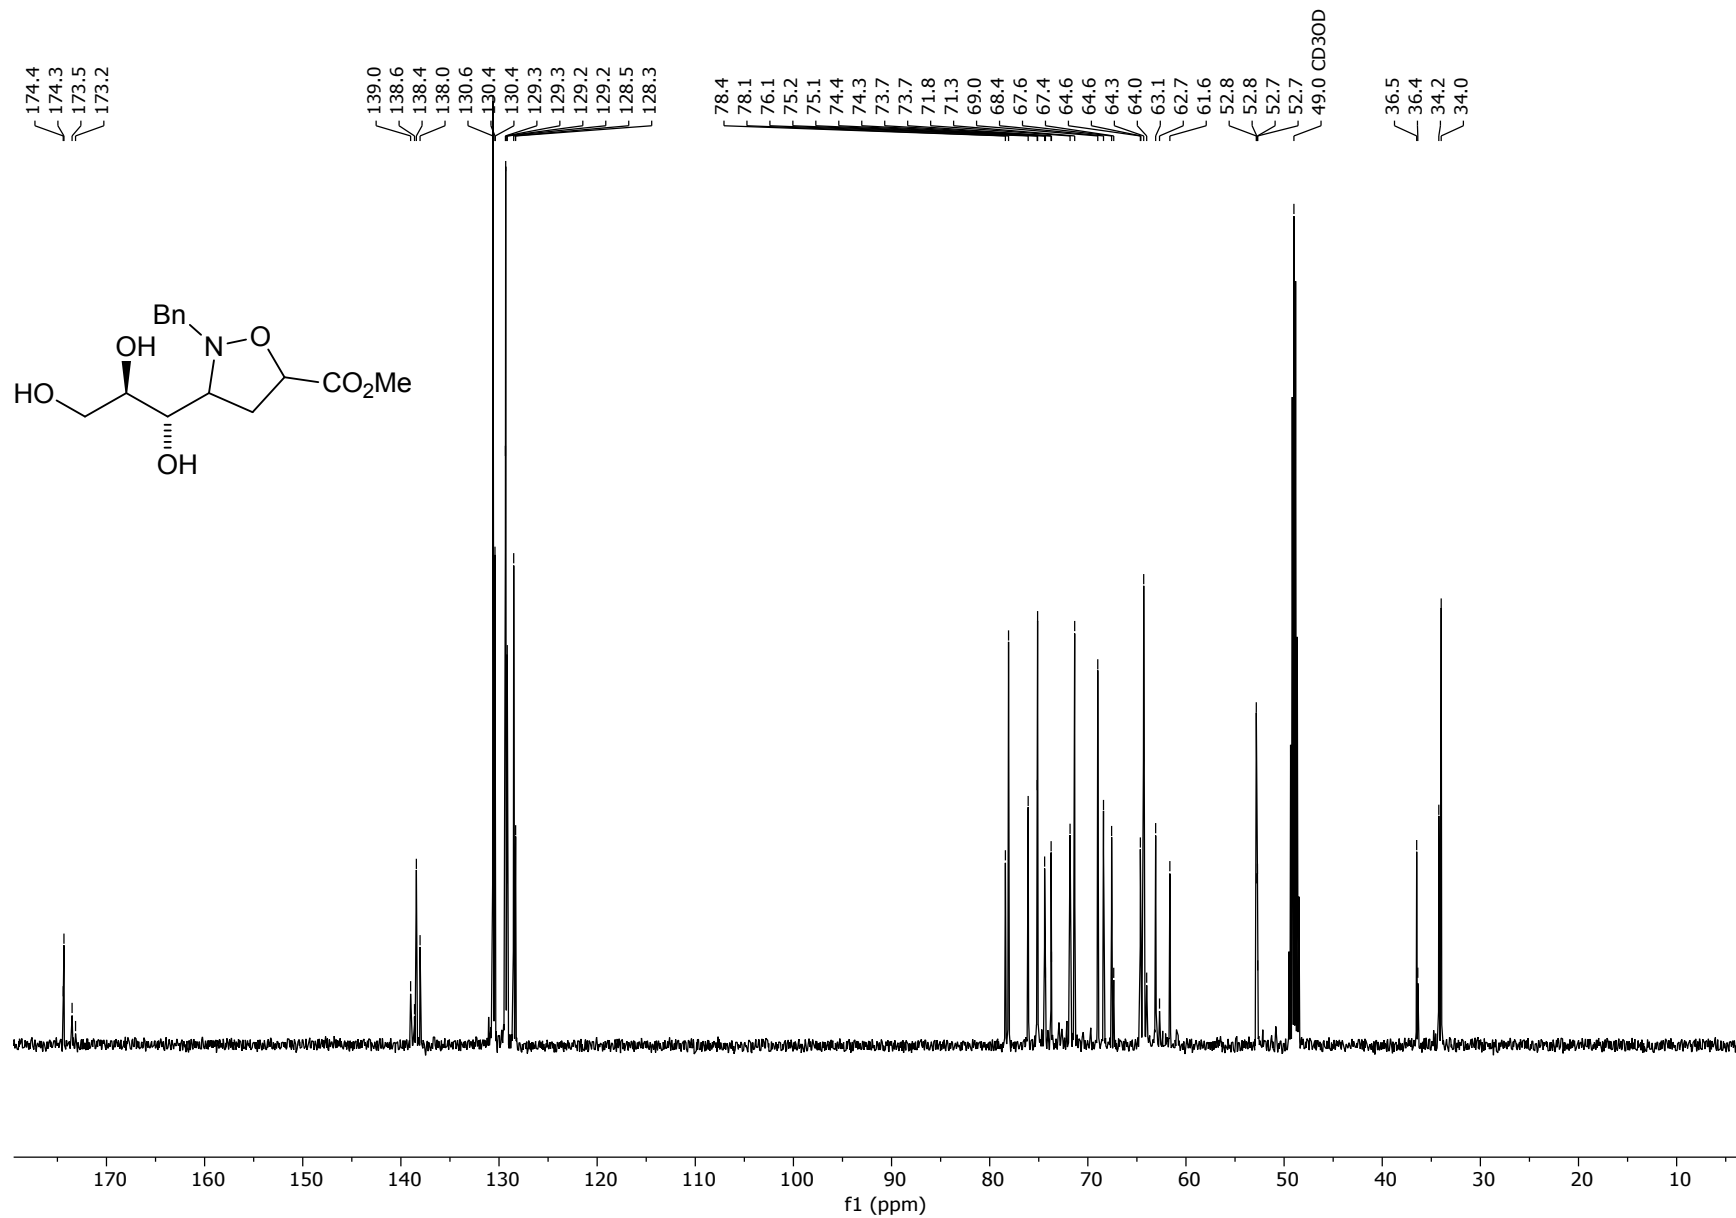

<sup>1</sup>H-NMR spectrum of 20 (CD<sub>3</sub>OD)

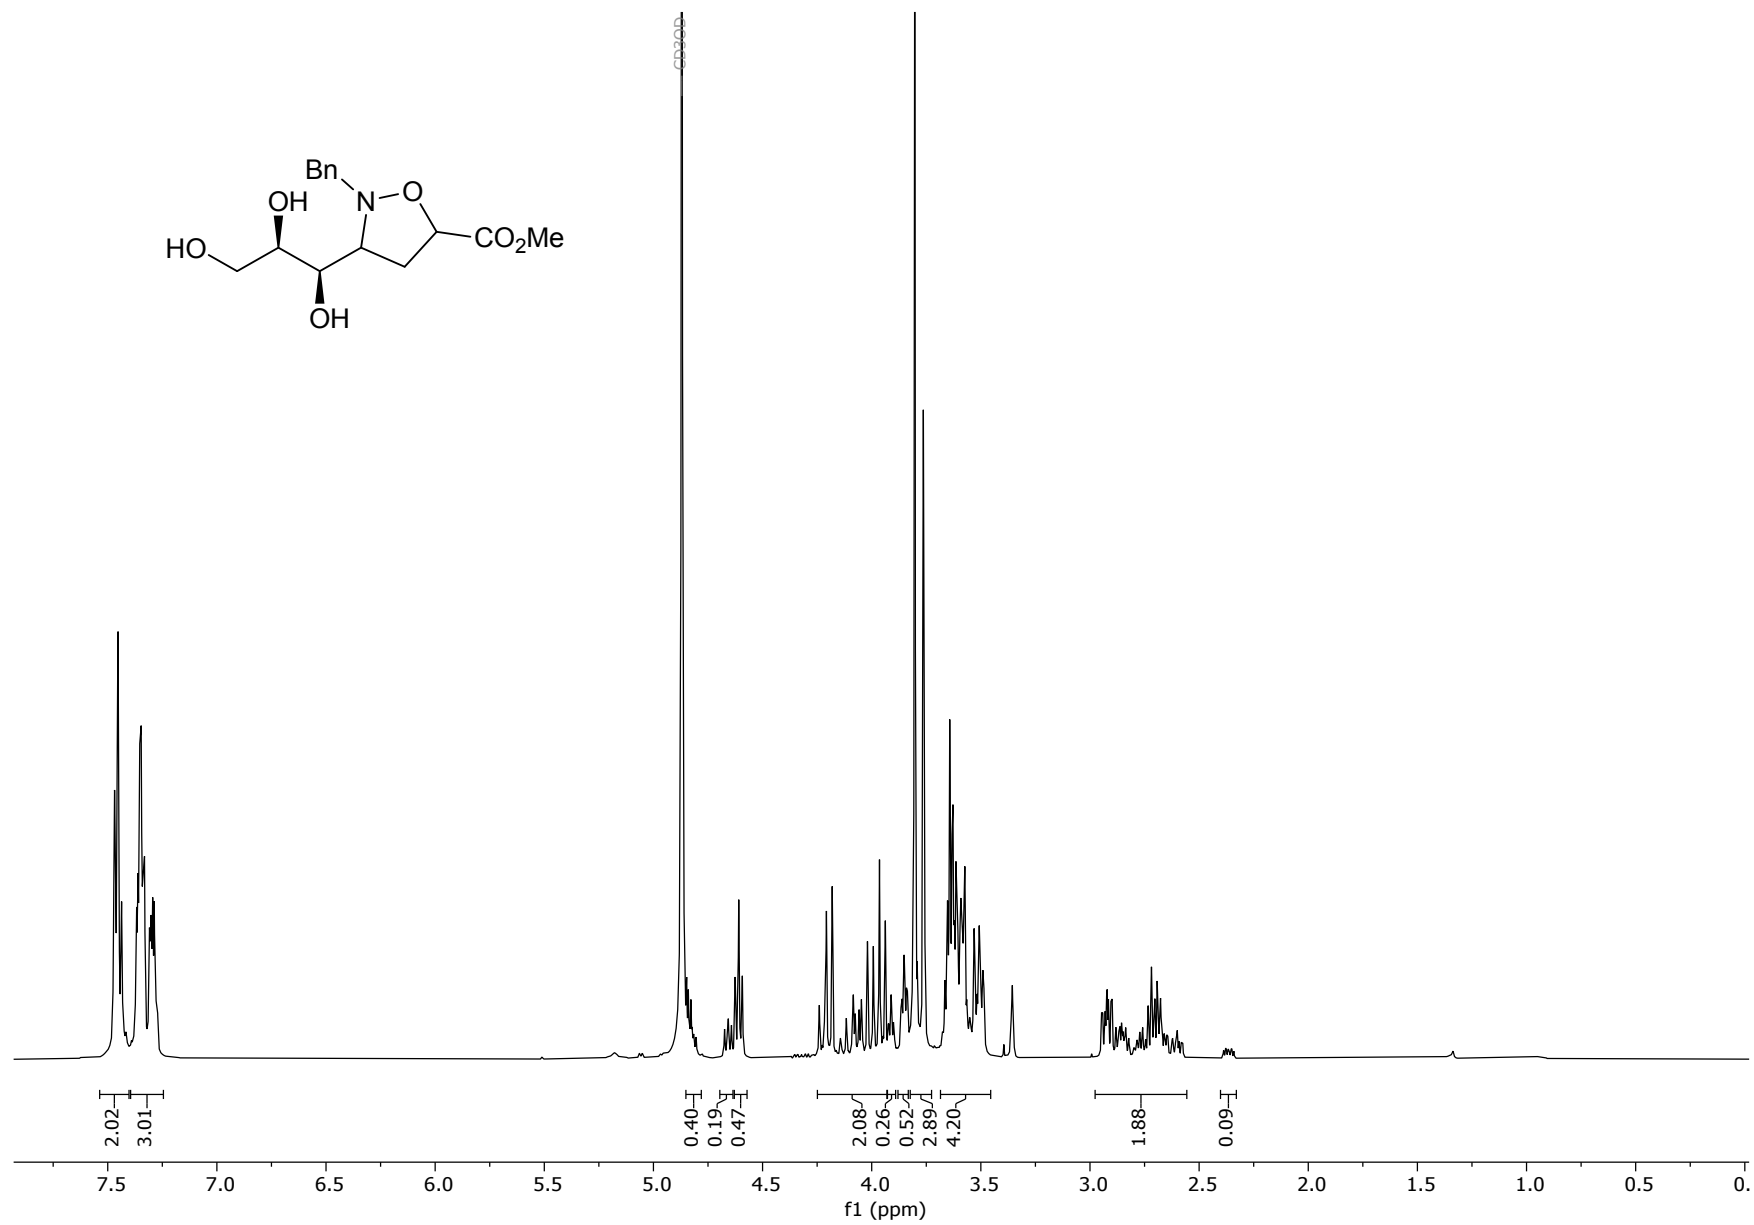

<sup>13</sup>C-NMR spectrum of 20 (CD<sub>3</sub>OD)

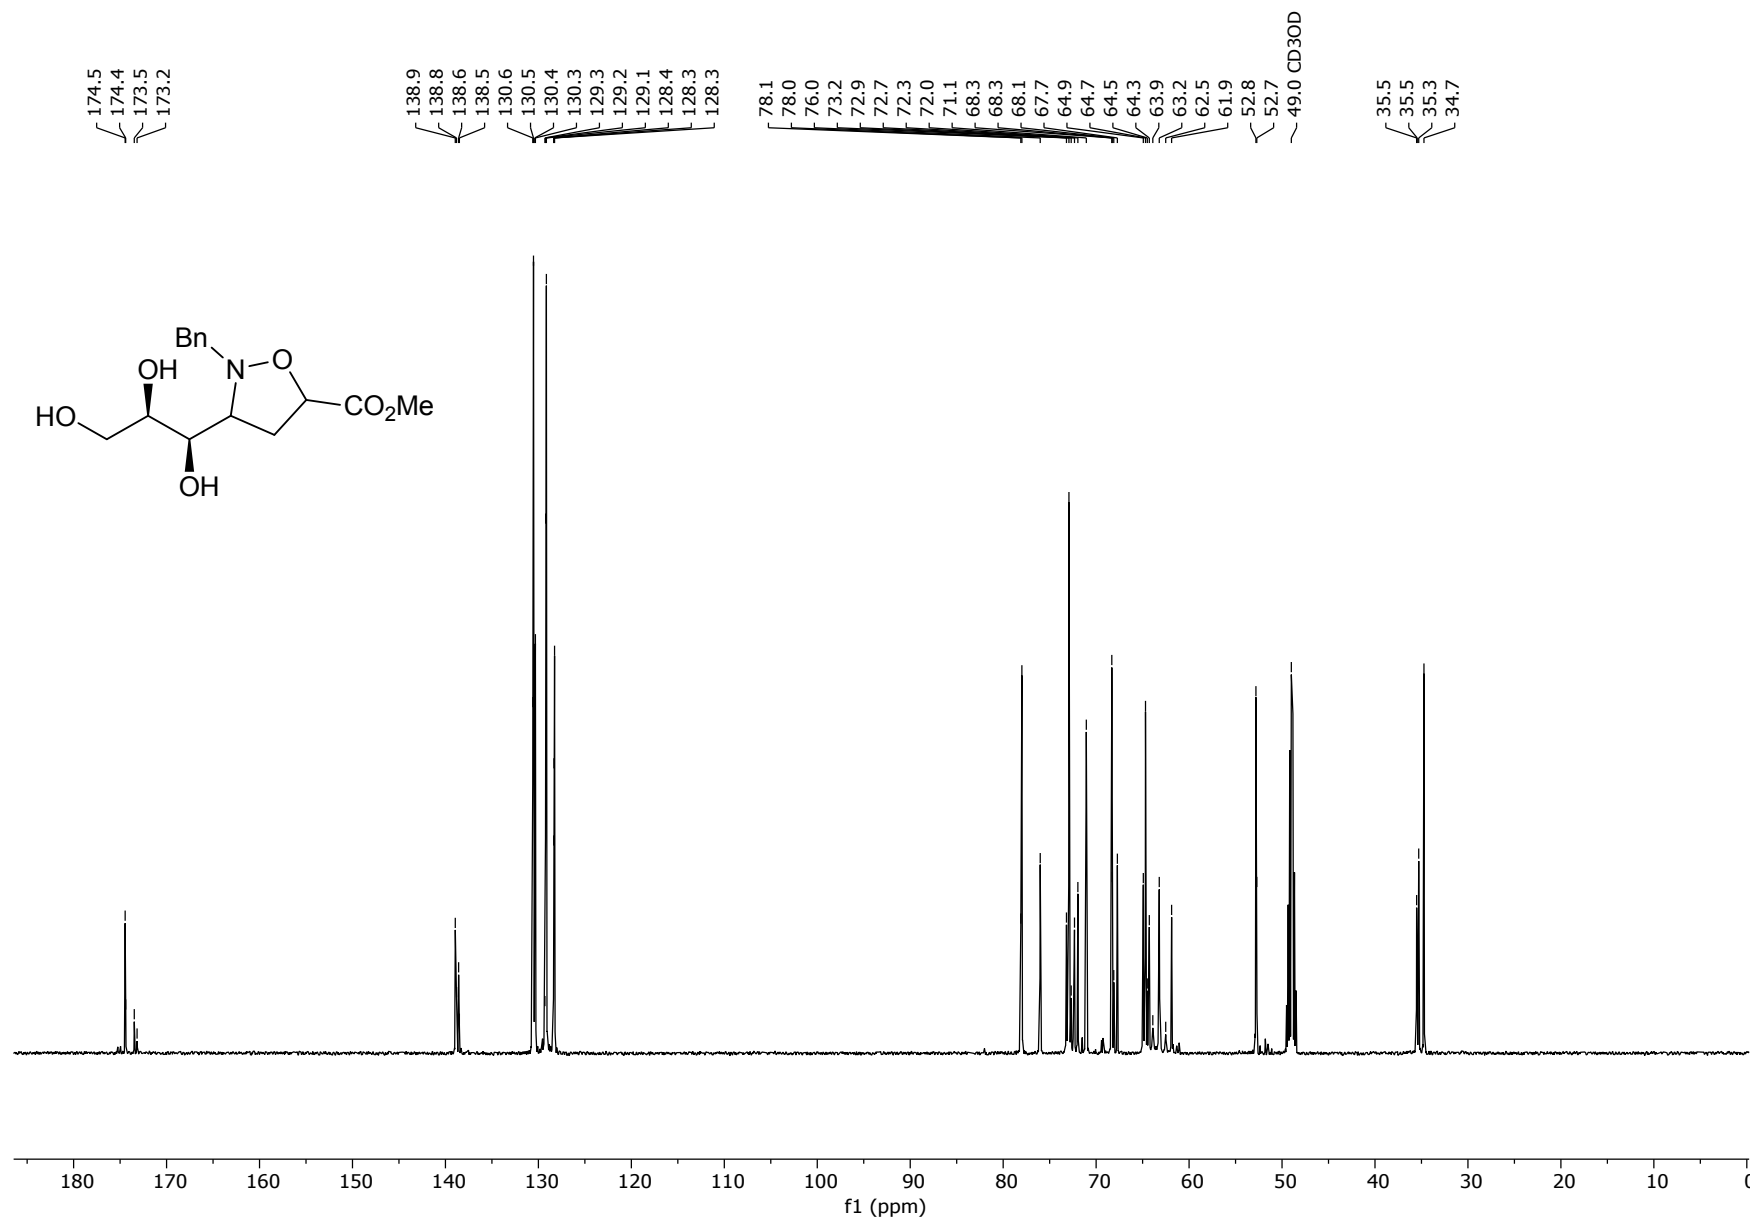

<sup>1</sup>H-NMR spectrum of 21 (CD<sub>3</sub>OD)

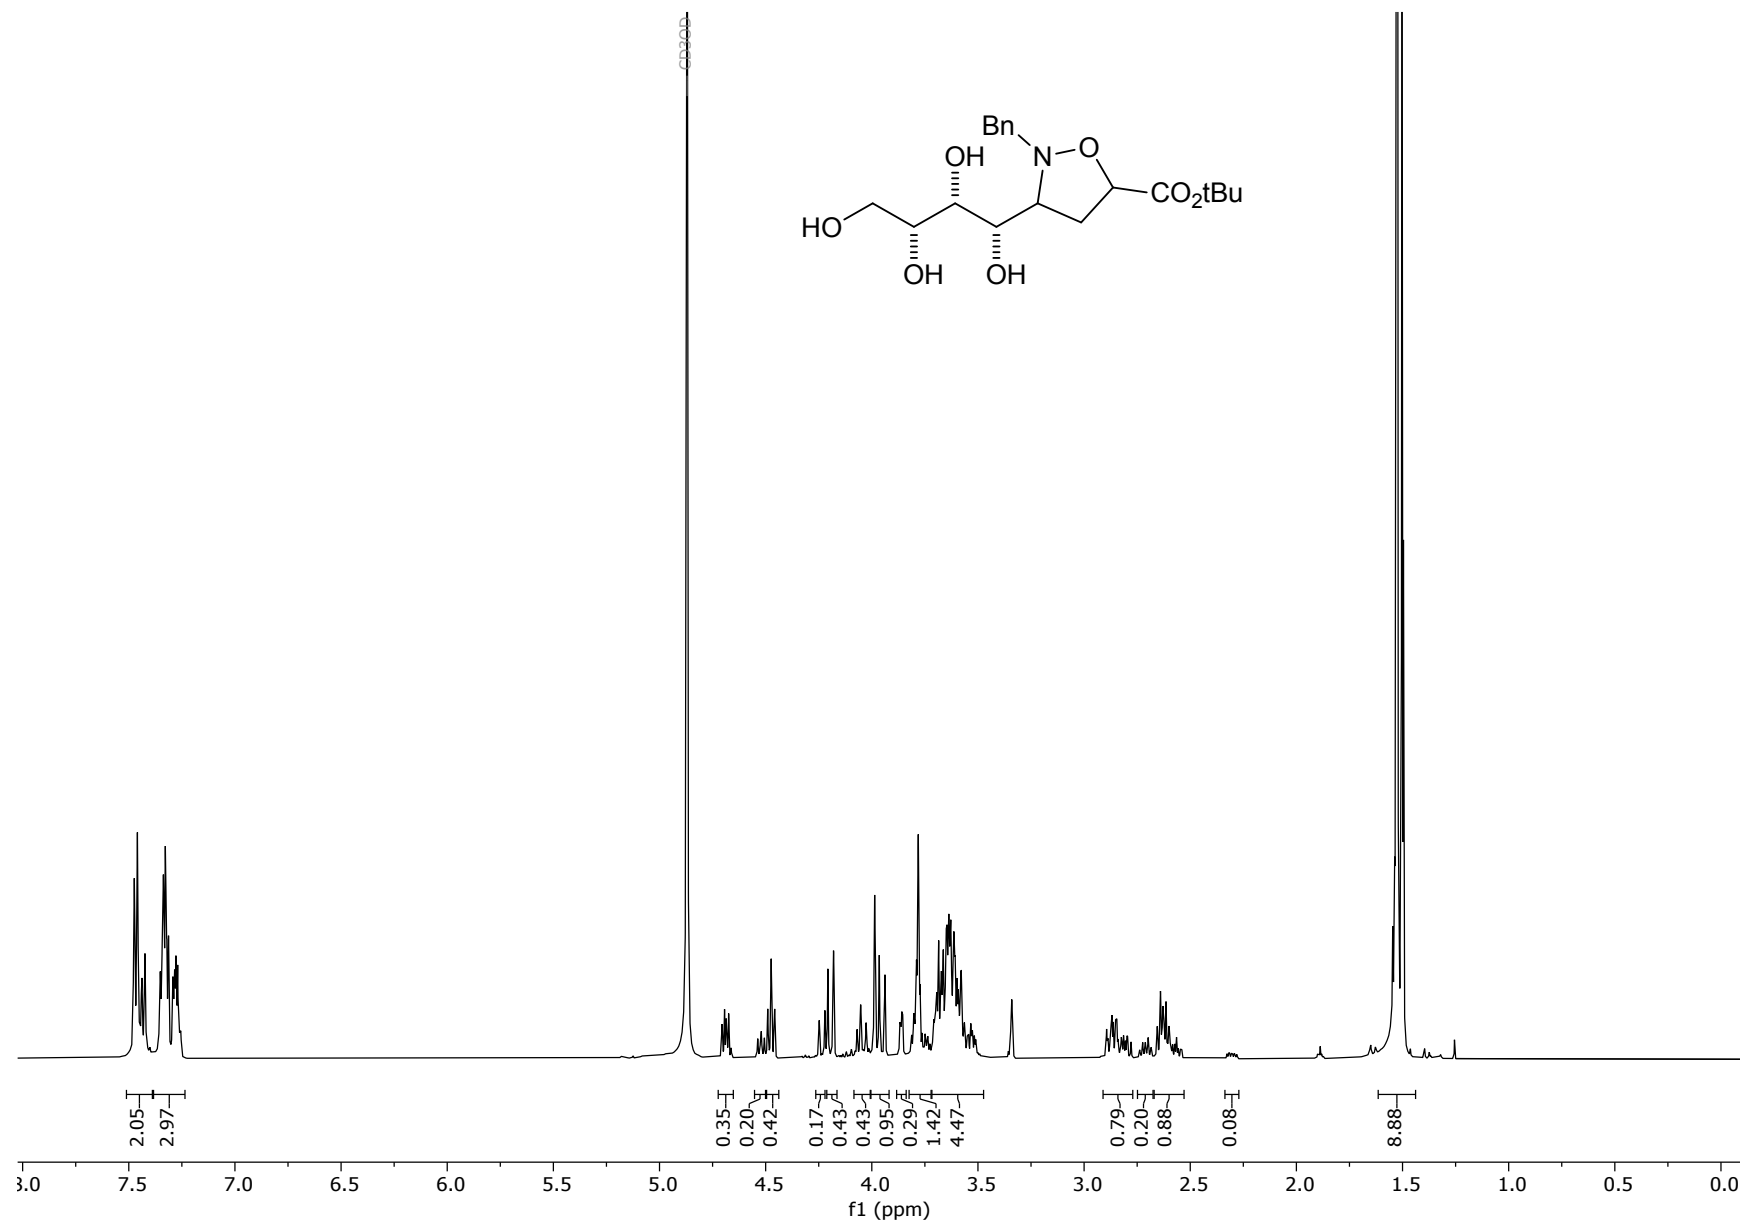

<sup>13</sup>C-NMR spectrum of 21 (CD<sub>3</sub>OD)

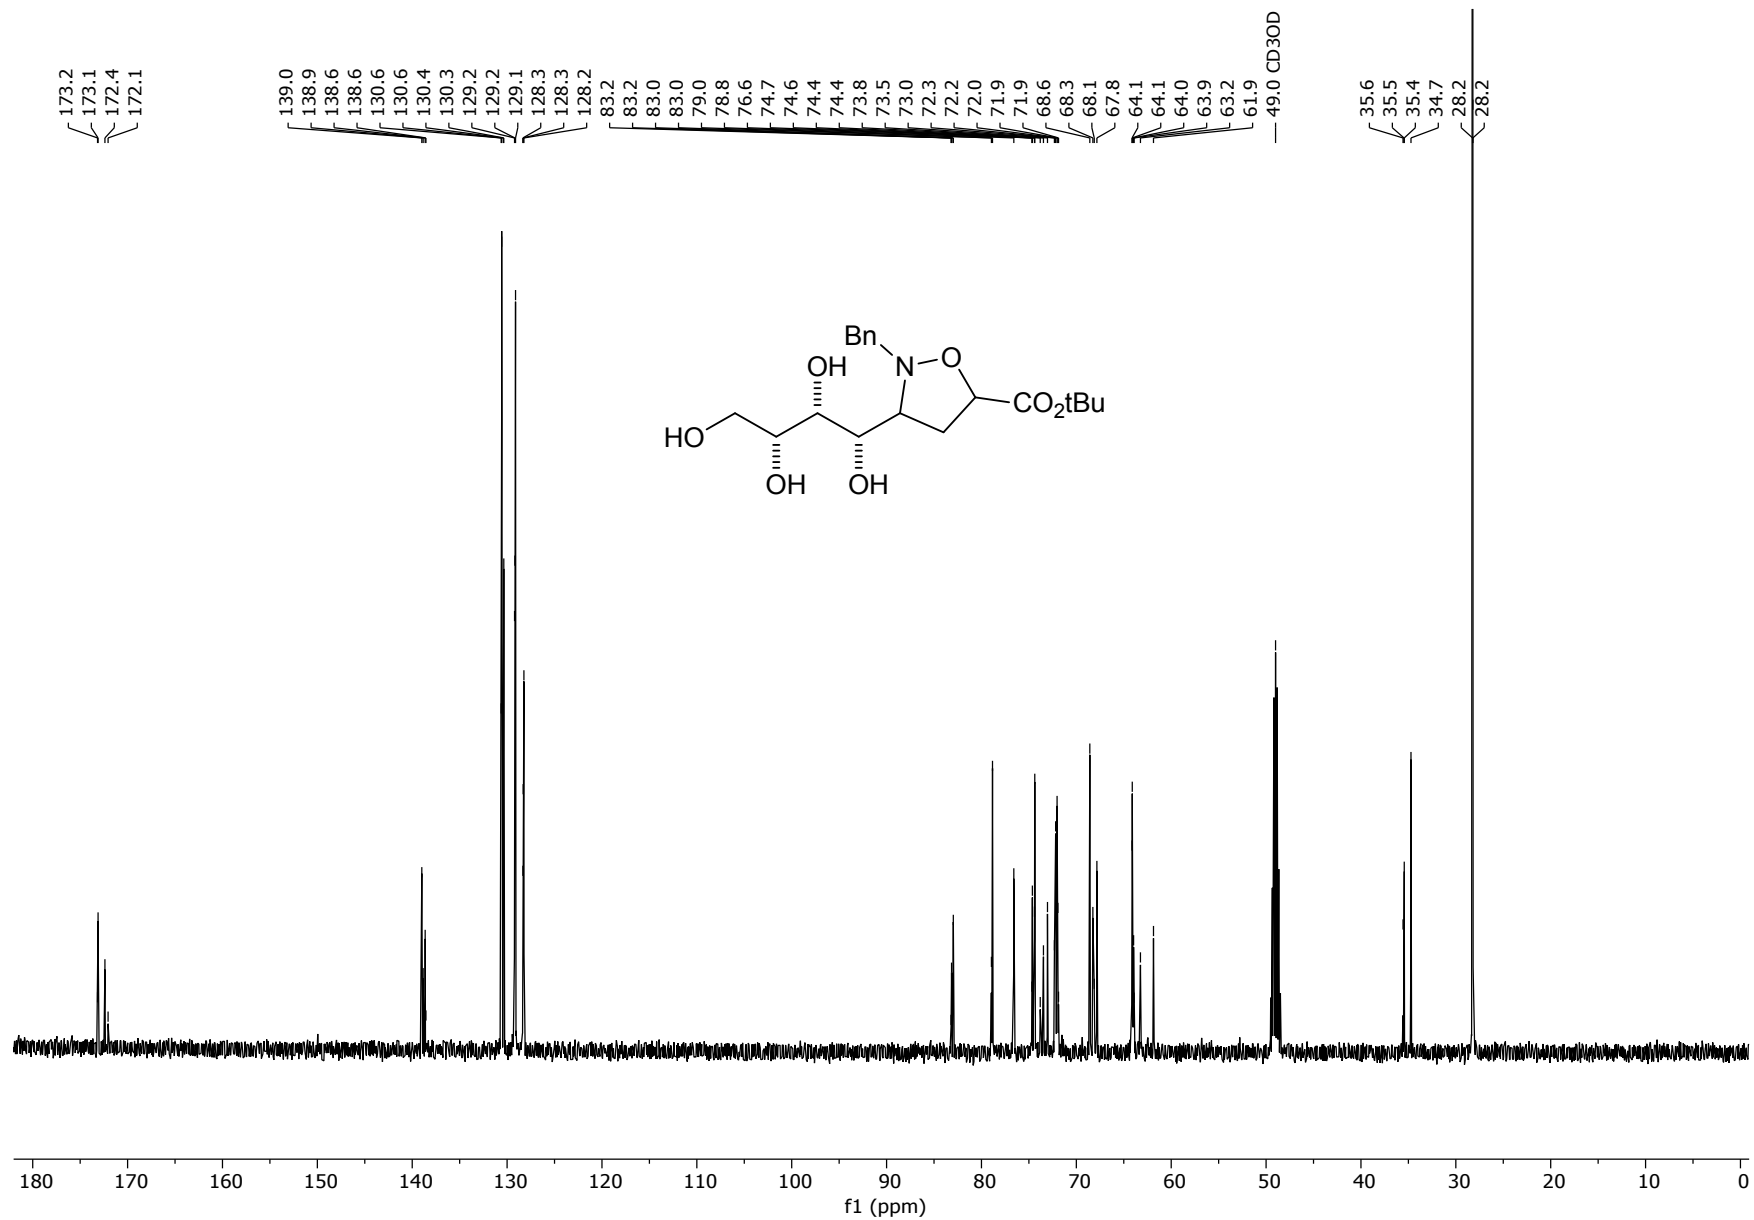



<sup>1</sup>H-NMR spectrum of 22 (CD<sub>3</sub>OD)

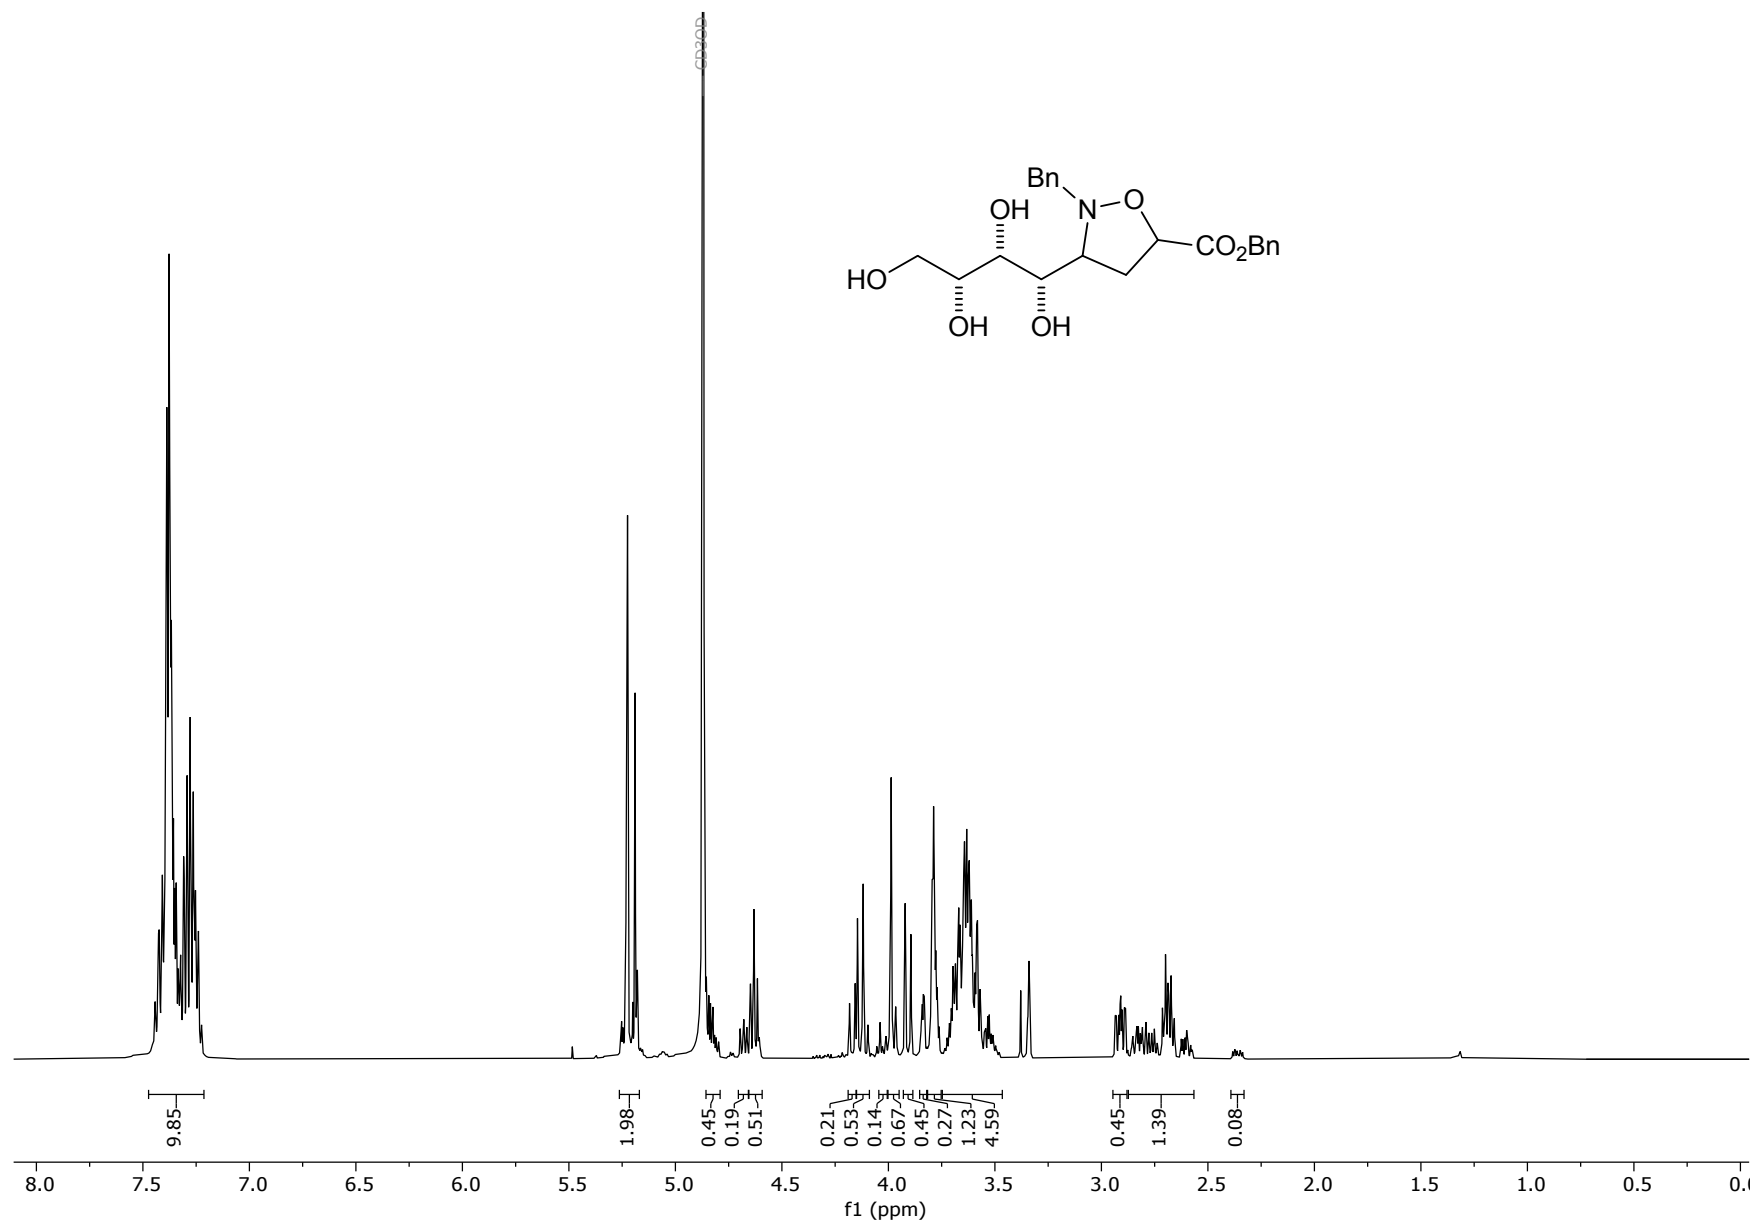

<sup>13</sup>C-NMR spectrum of 22 (CD<sub>3</sub>OD)

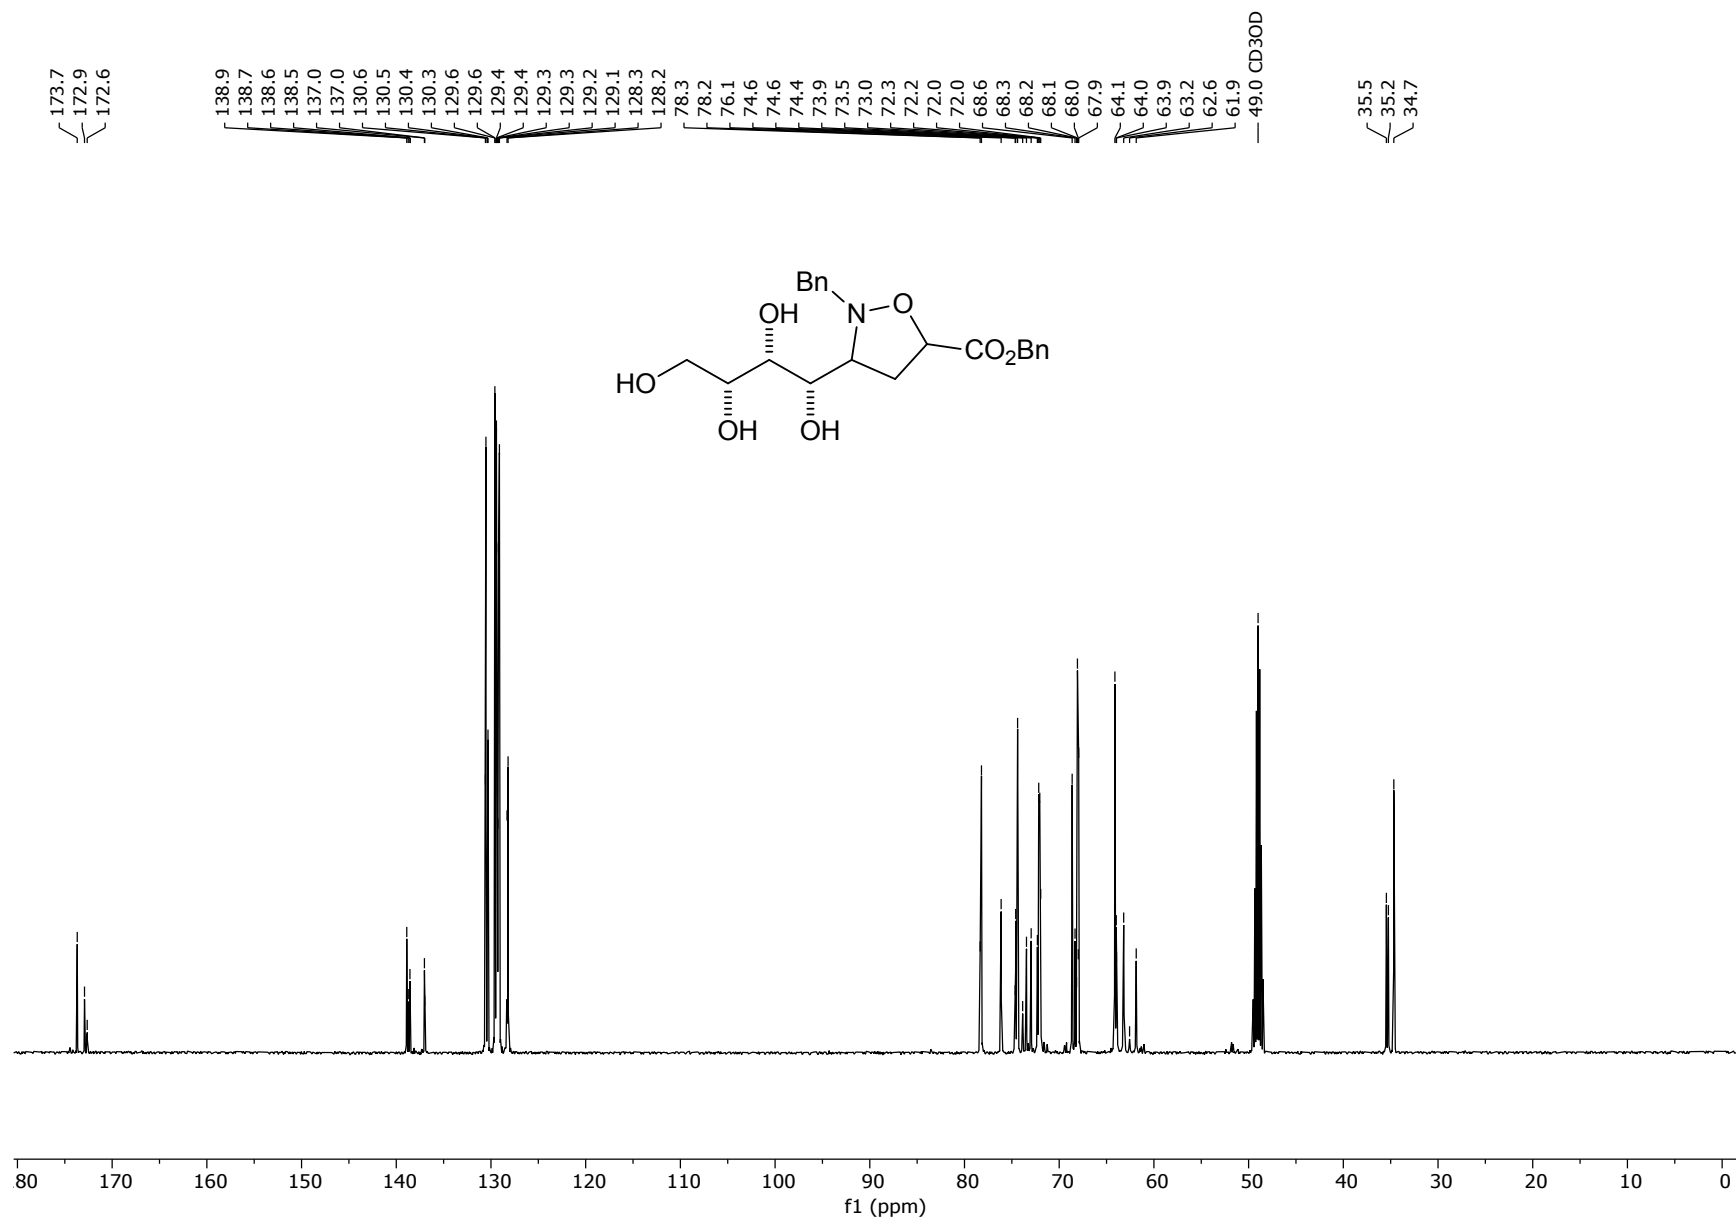

<sup>1</sup>H-NMR spectrum of 23 (CD<sub>3</sub>OD)

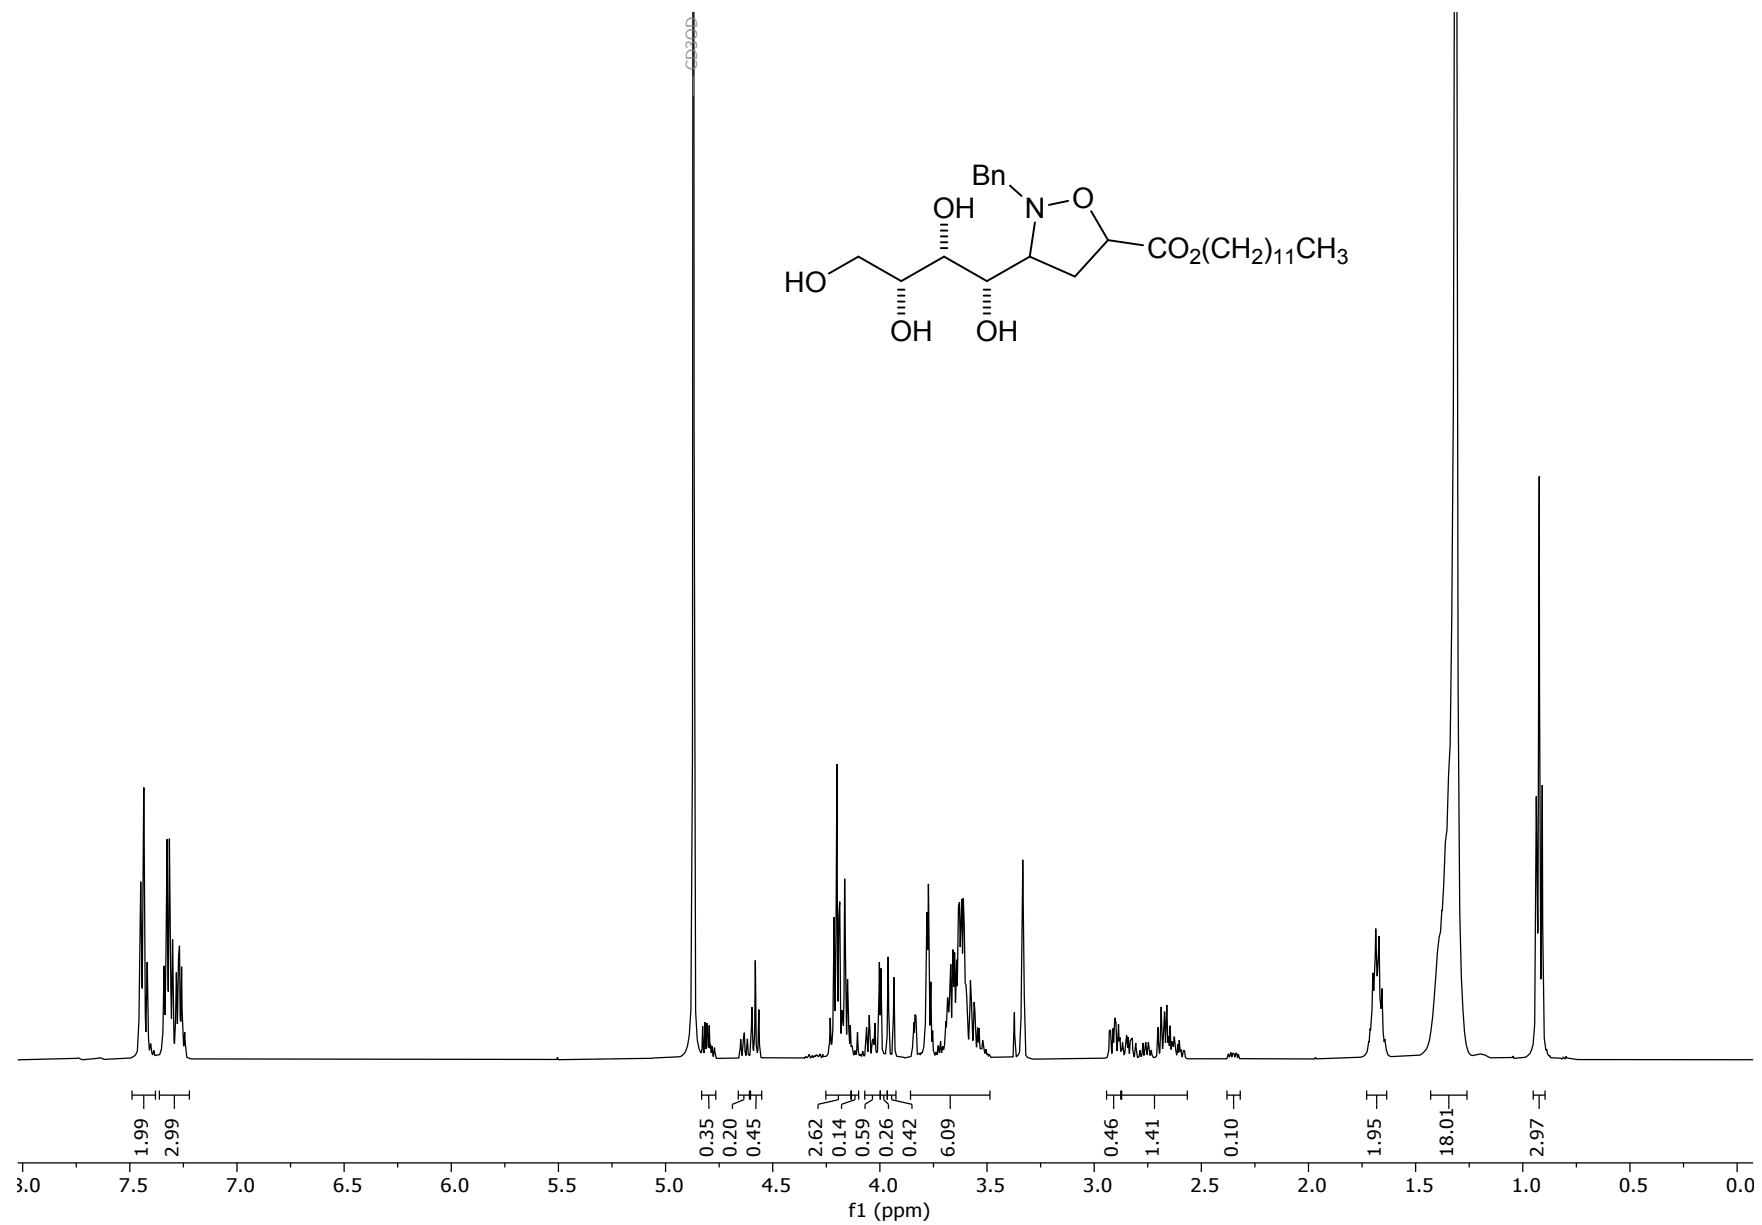

<sup>13</sup>C-NMR spectrum of 23 (CD<sub>3</sub>OD)

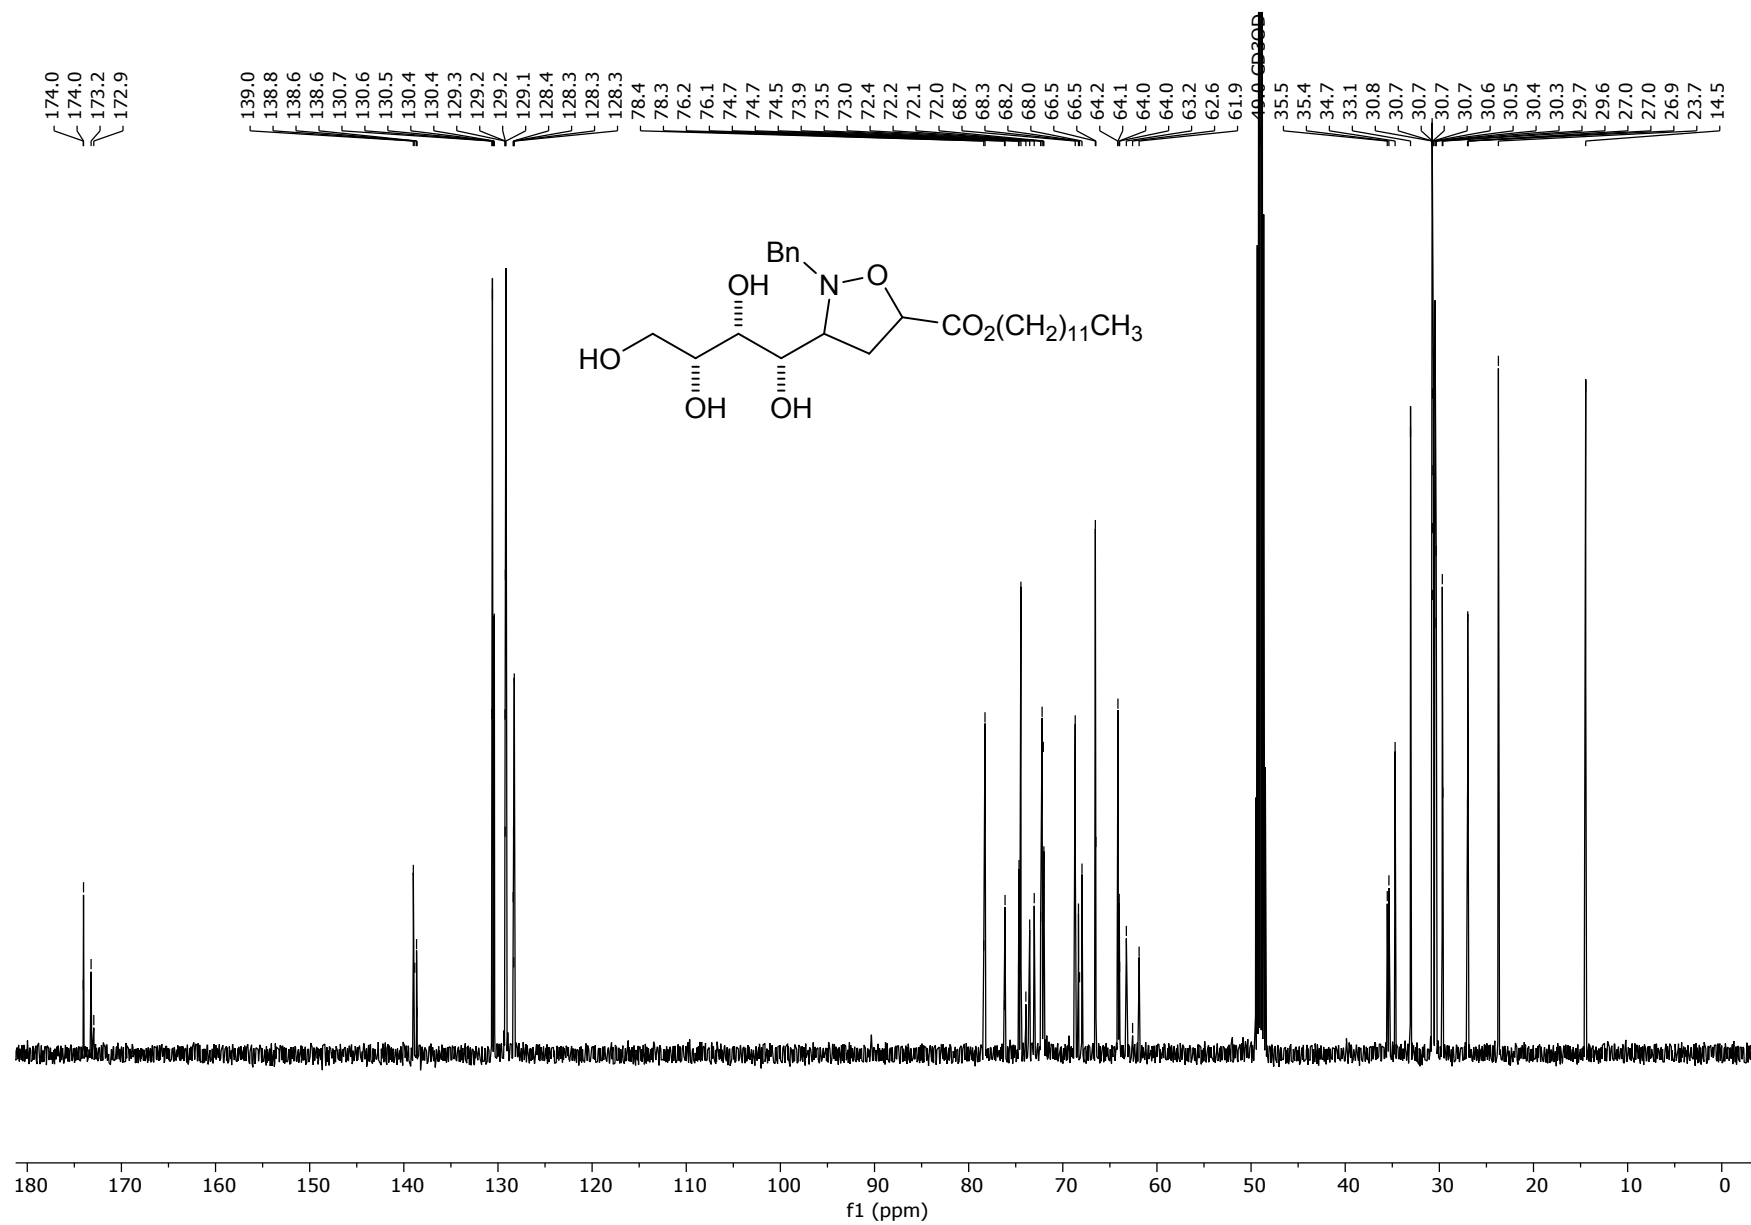

<sup>1</sup>H-NMR spectrum of 24 (CD<sub>3</sub>OD)

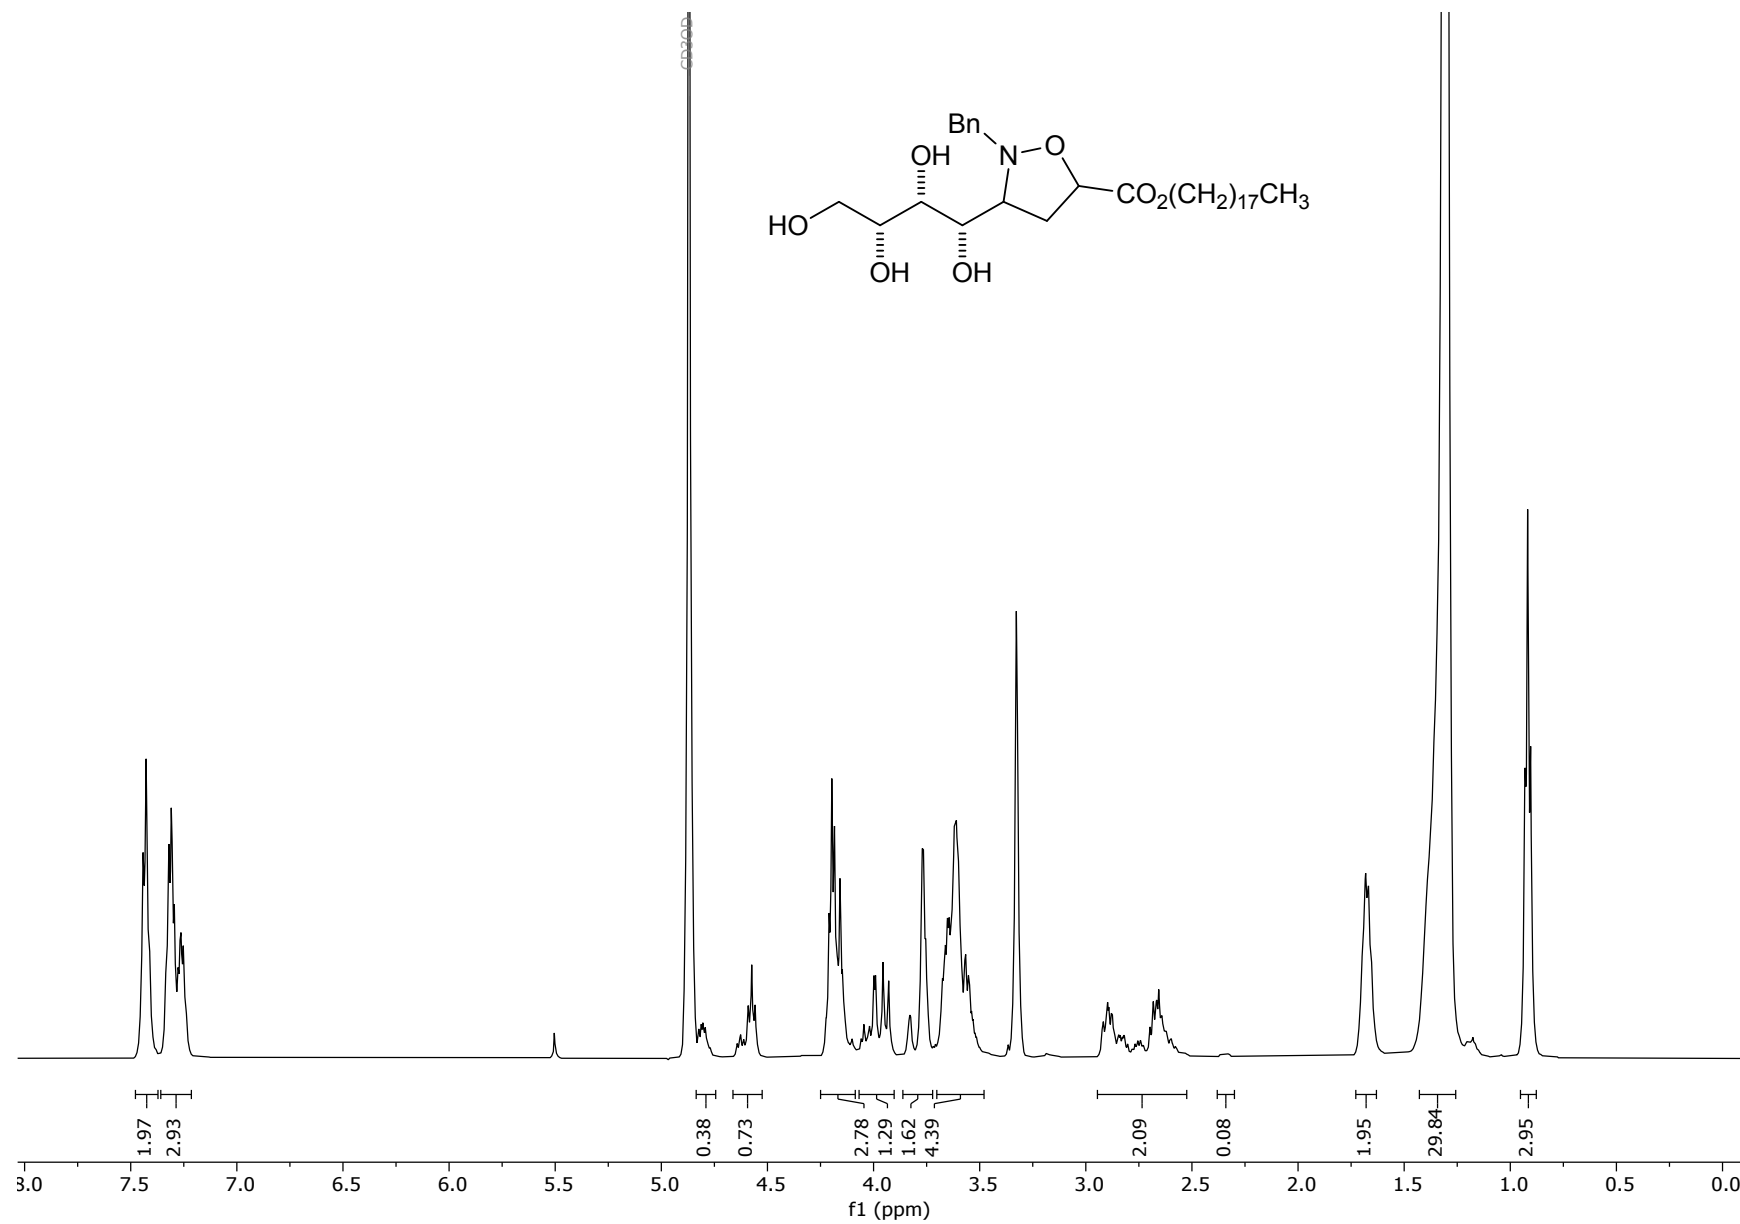

<sup>13</sup>C-NMR spectrum of 24 (CD<sub>3</sub>OD)

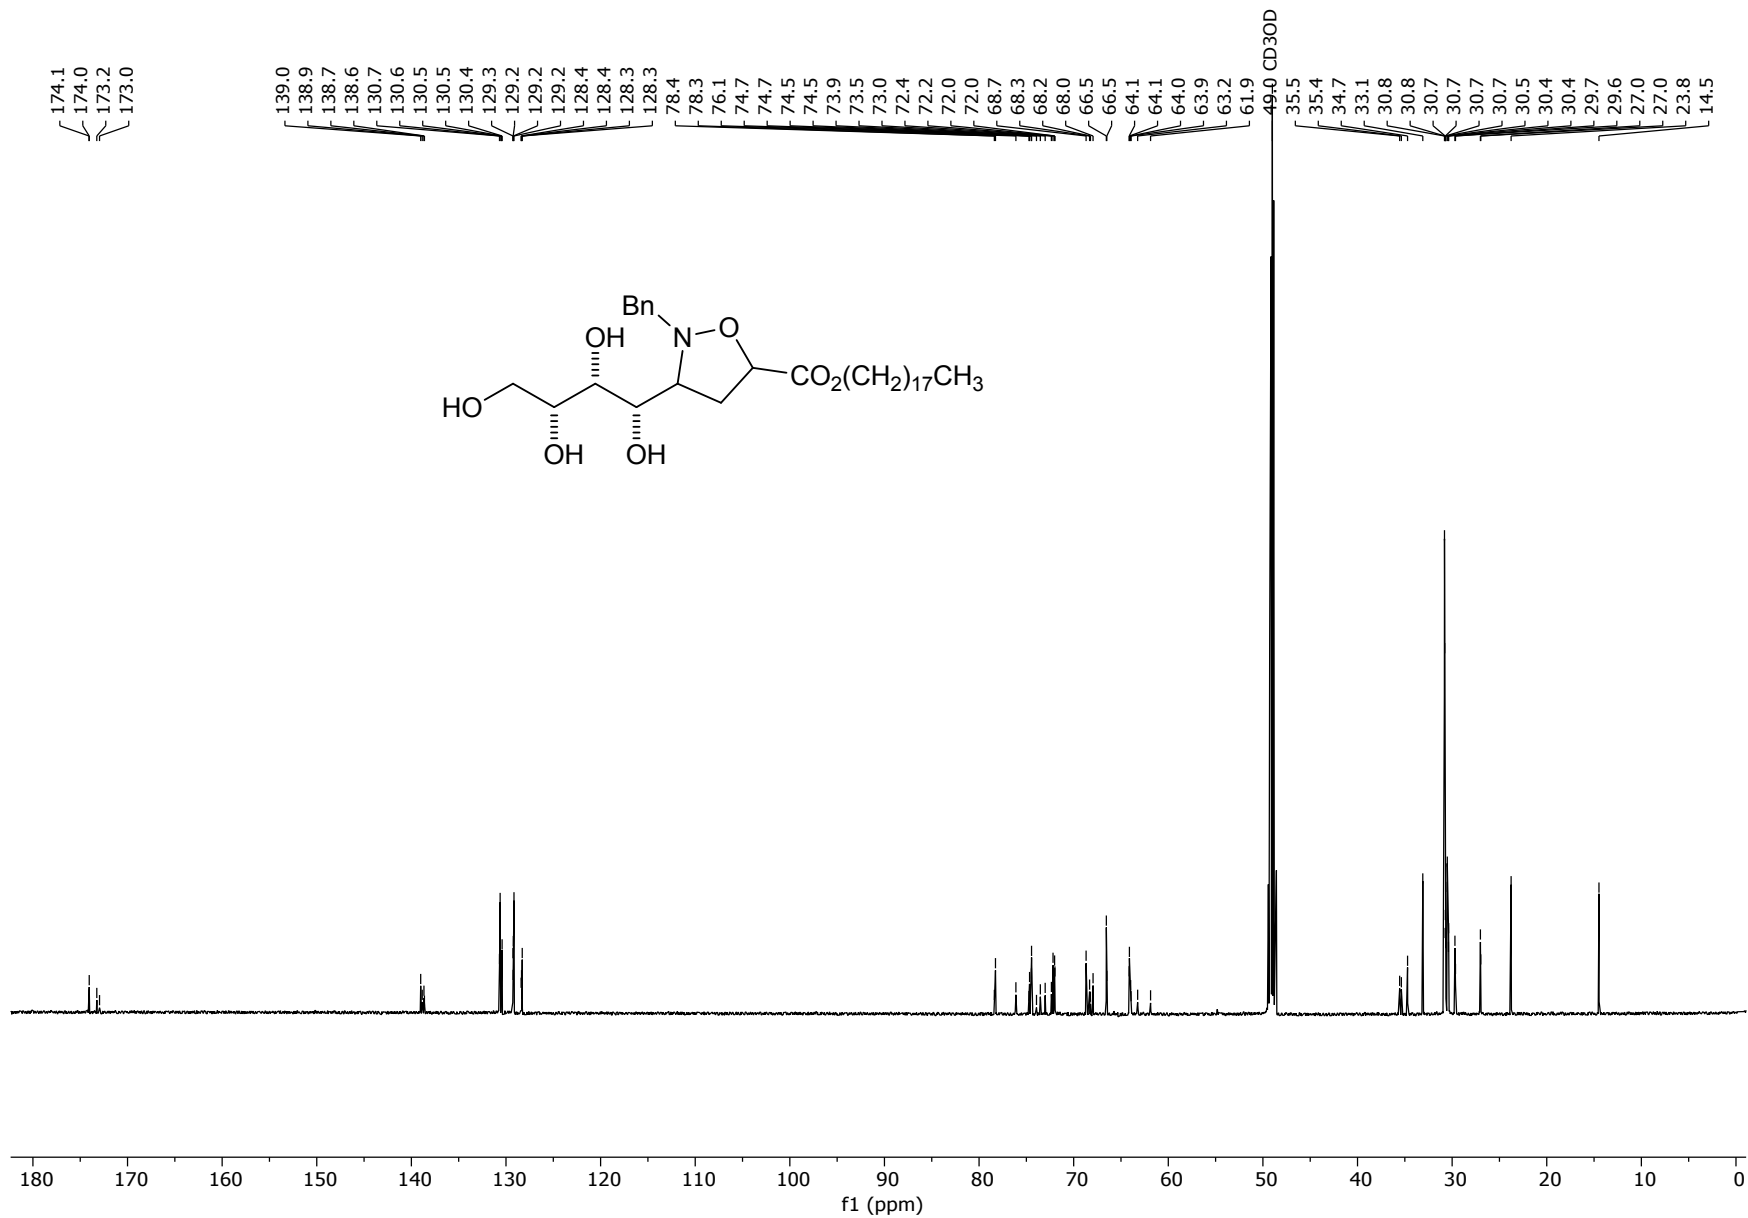

<sup>1</sup>H-NMR spectrum of 25 (CD<sub>3</sub>OD)

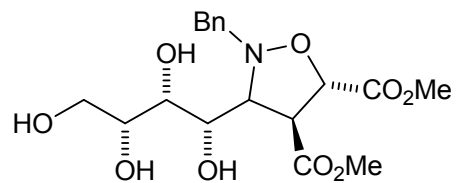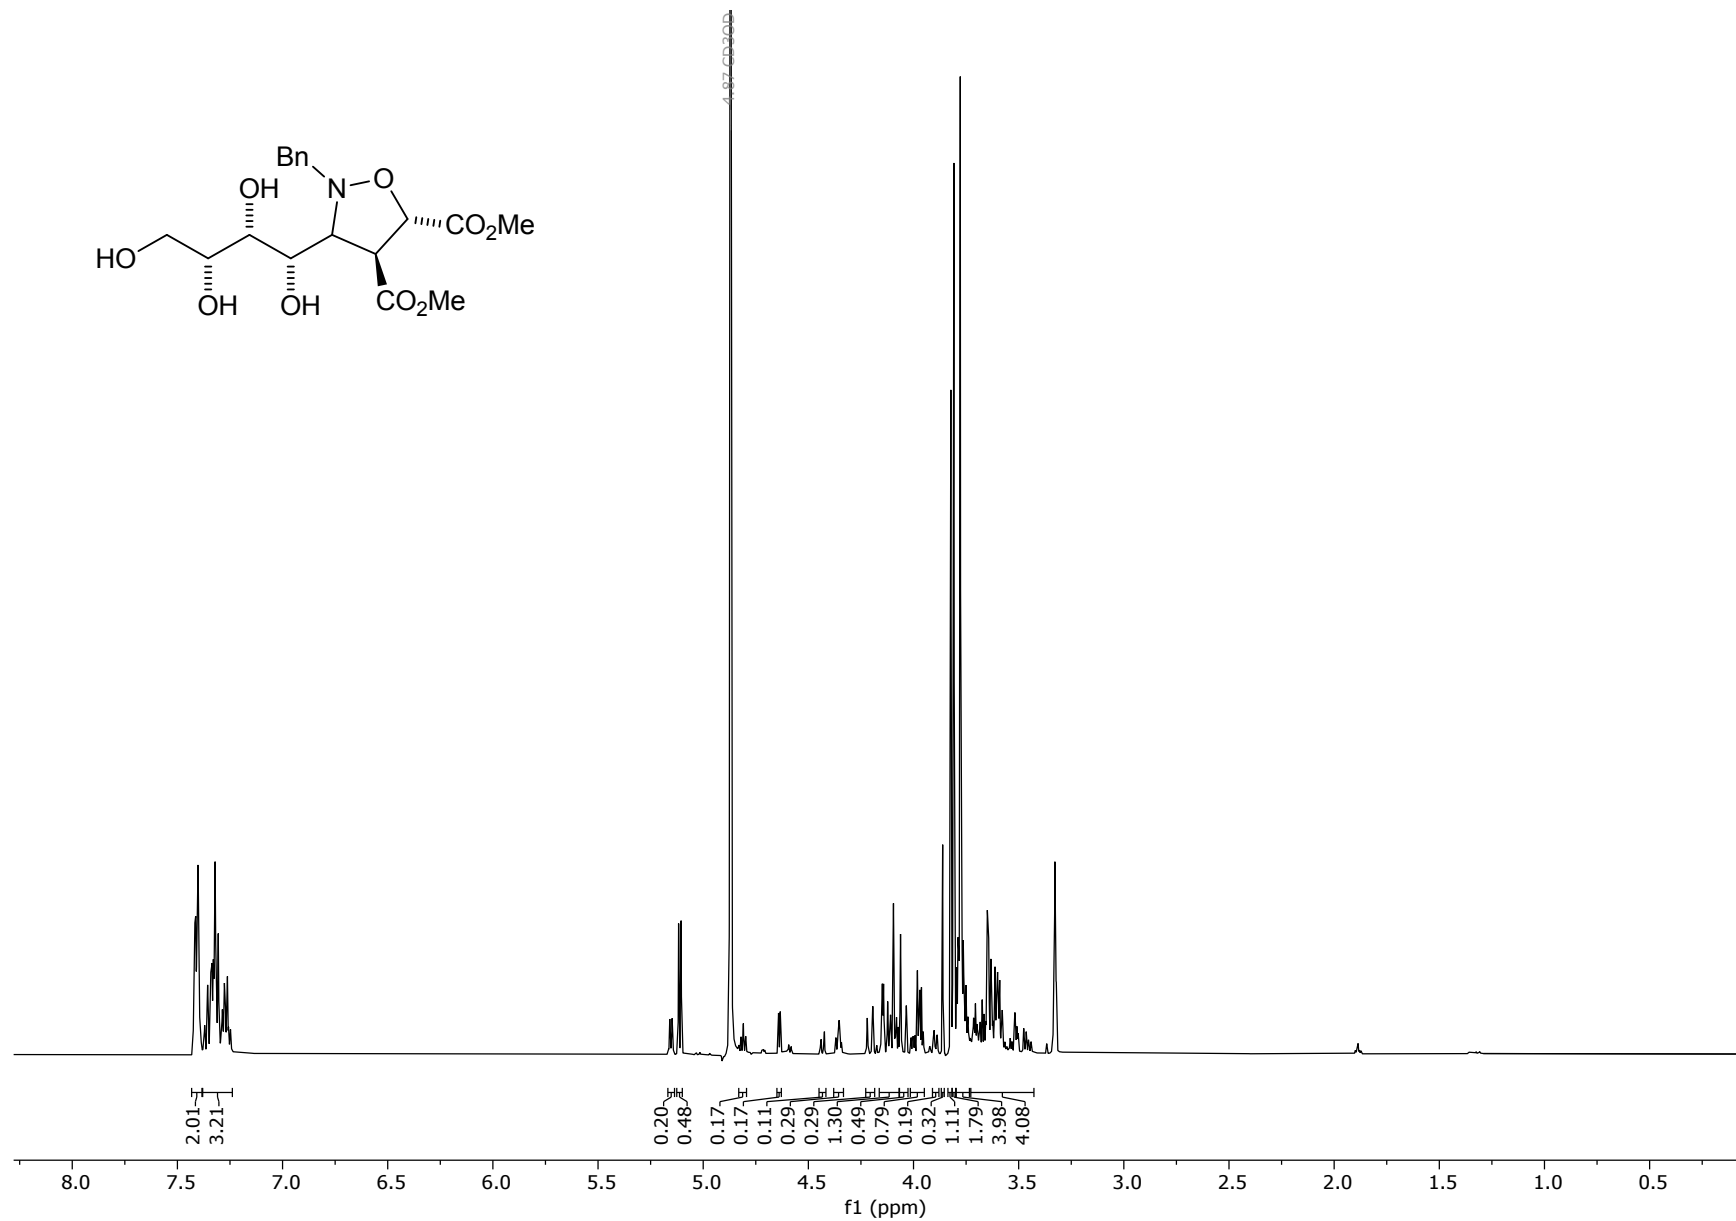

<sup>13</sup>C-NMR spectrum of 25 (CD<sub>3</sub>OD)

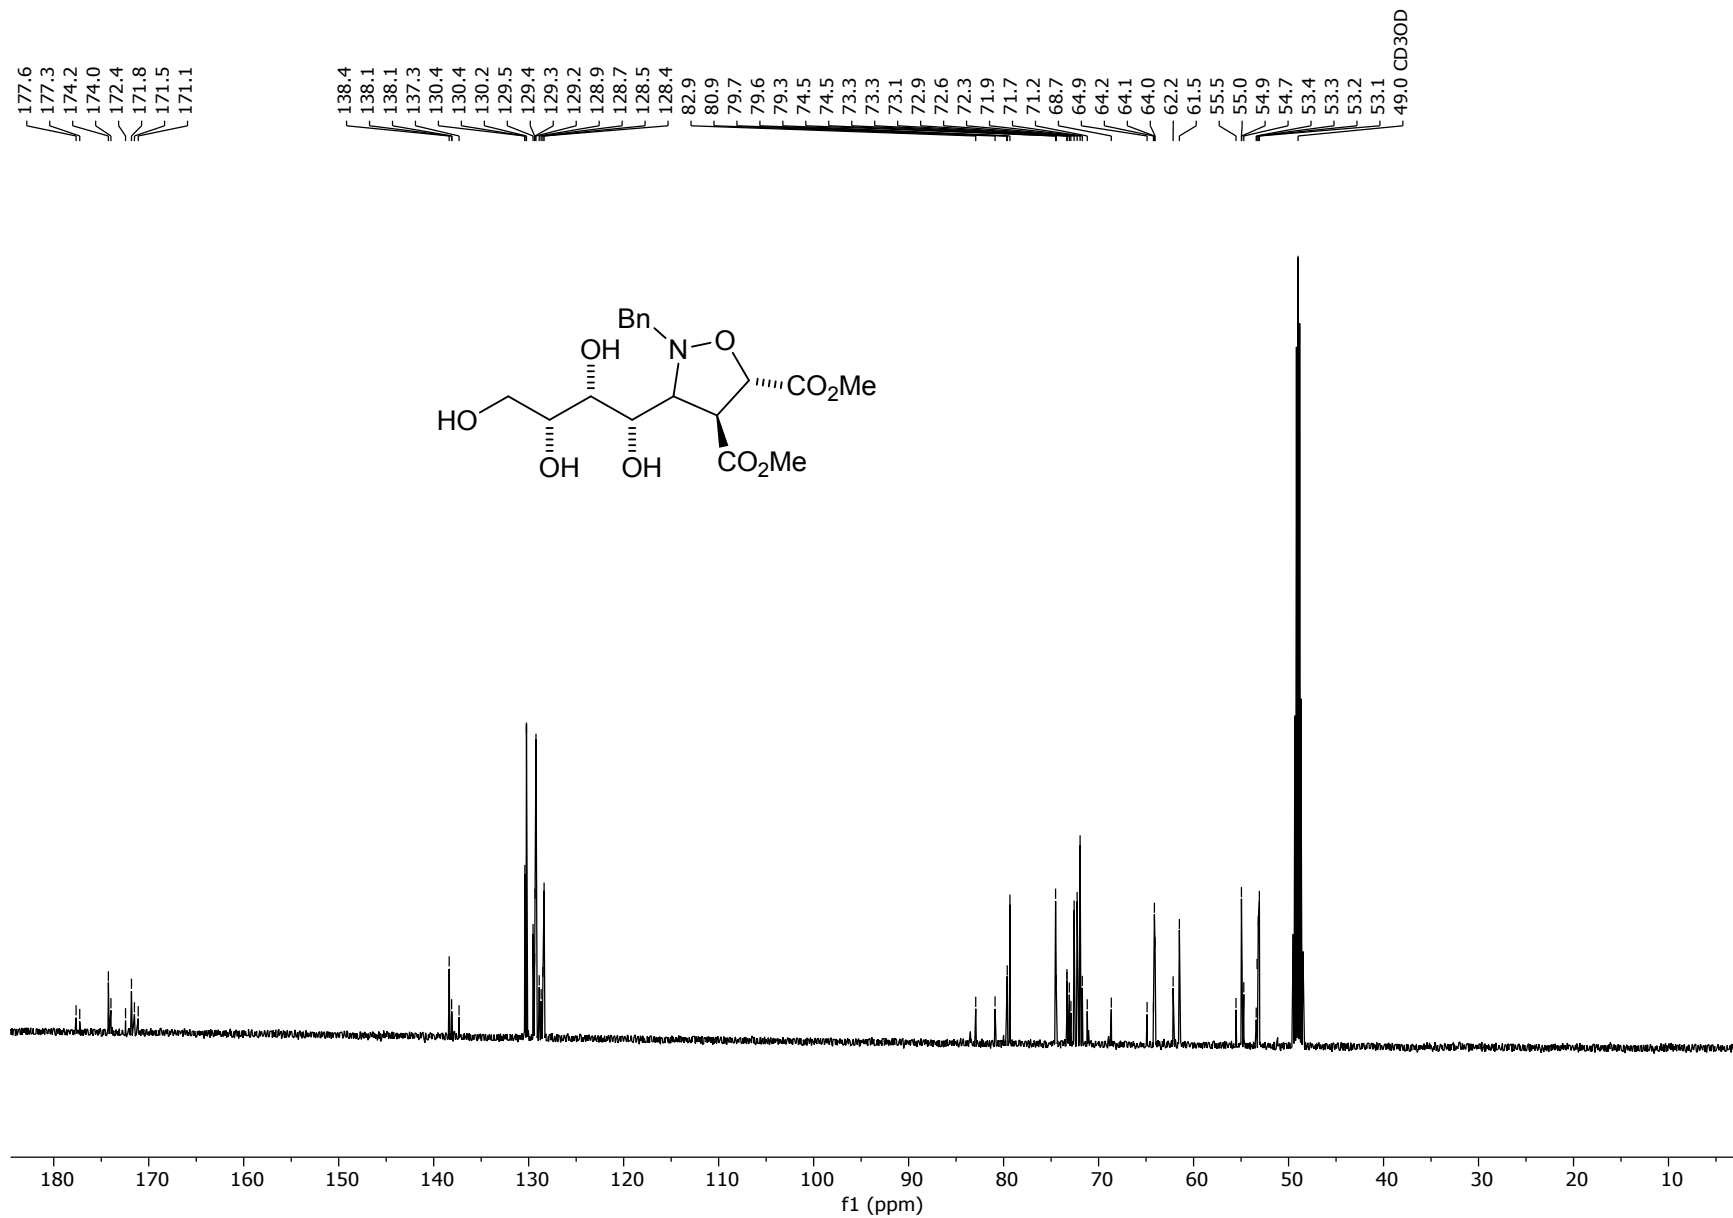



<sup>1</sup>H-NMR spectrum of 26 (CD<sub>3</sub>OD)

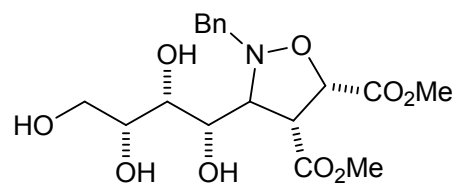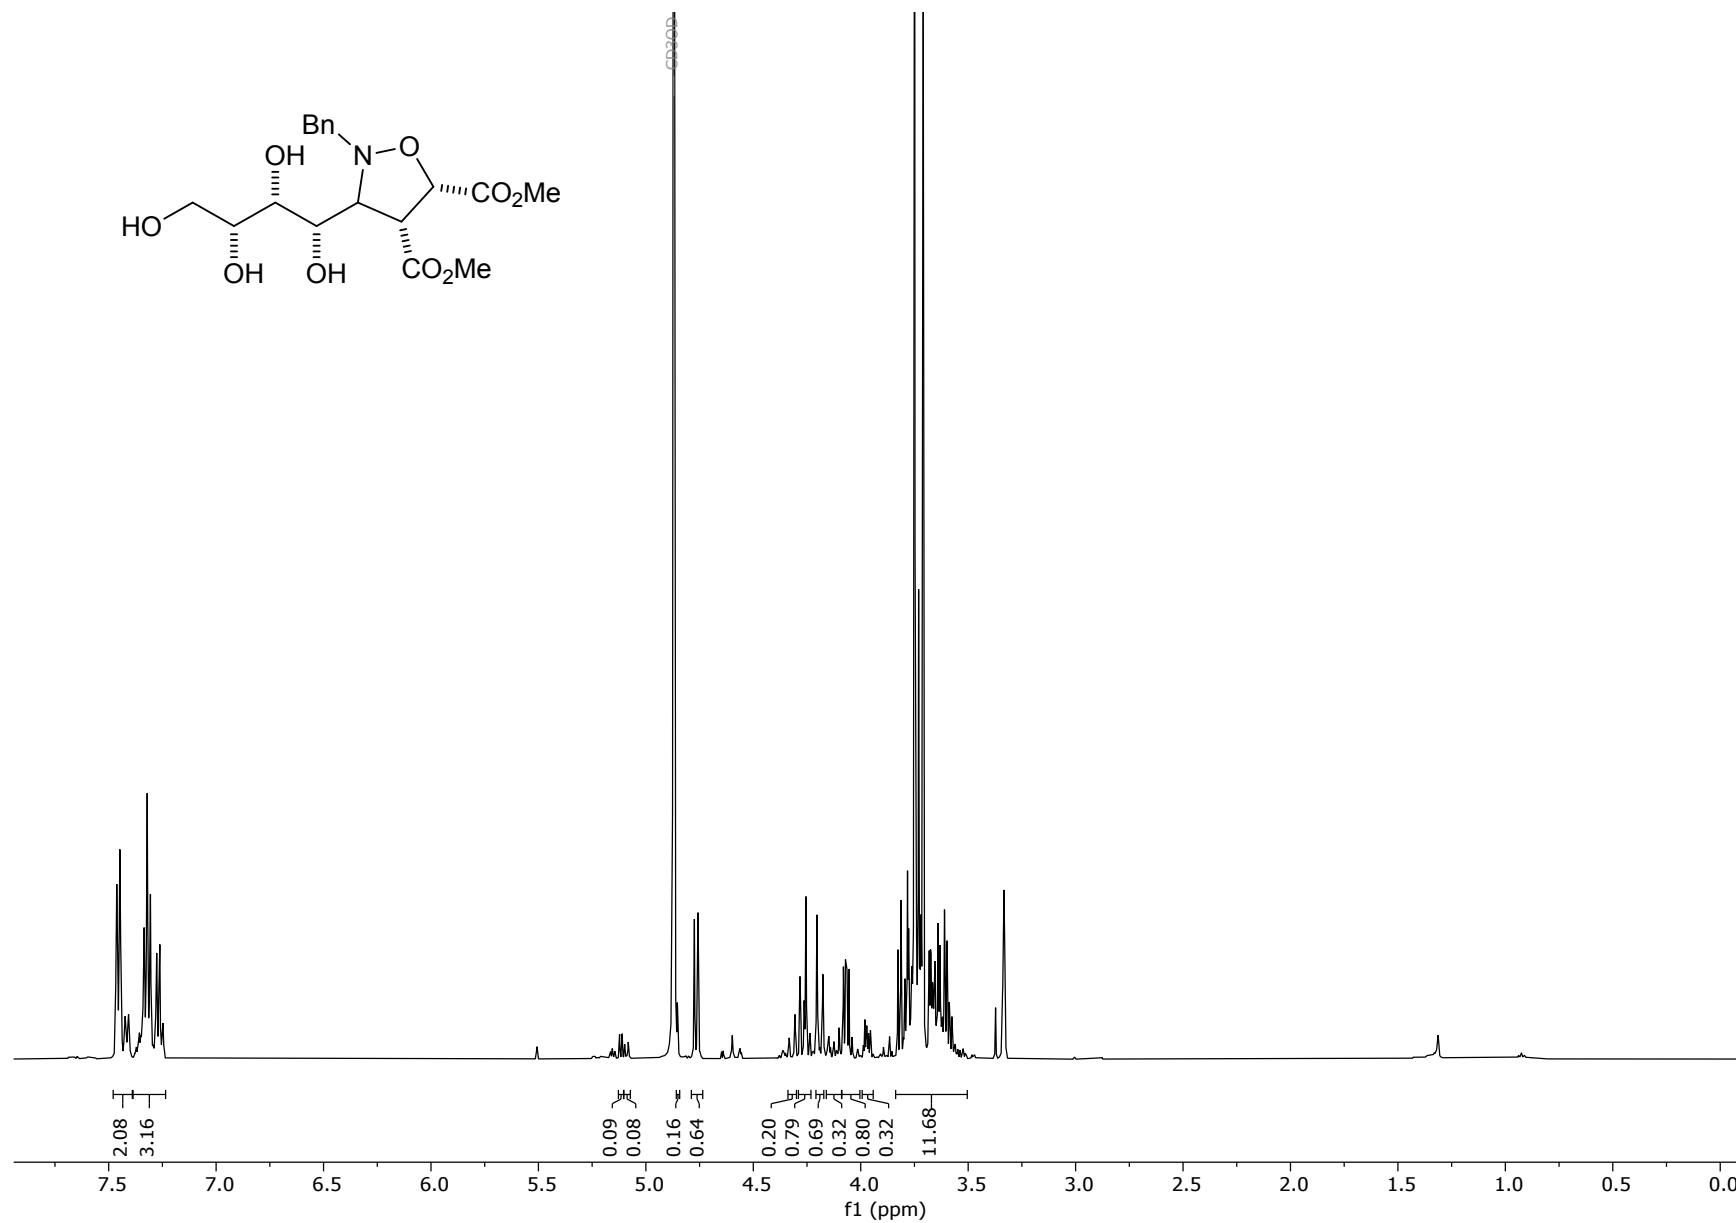

<sup>13</sup>C-NMR spectrum of 26 (CD<sub>3</sub>OD)

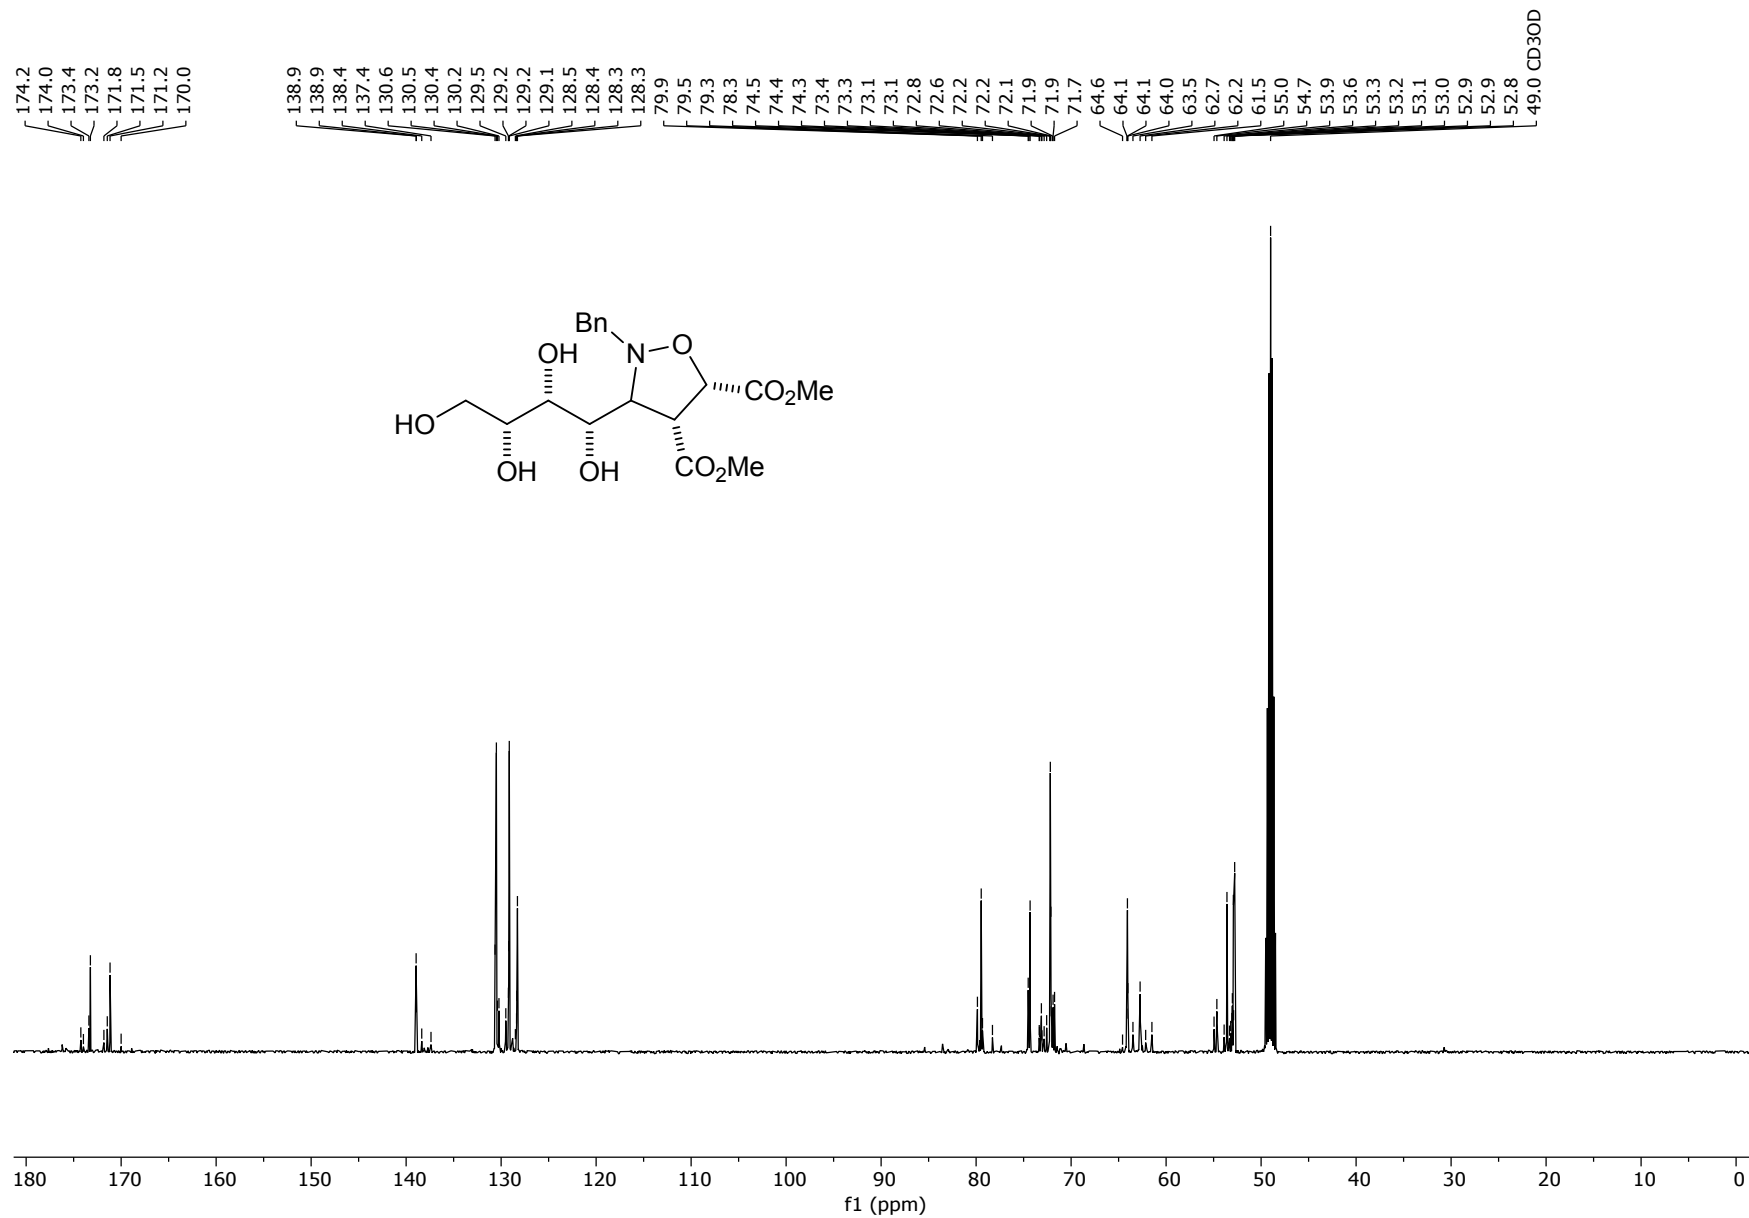

<sup>1</sup>H-NMR spectrum of 27 (CD<sub>3</sub>OD)

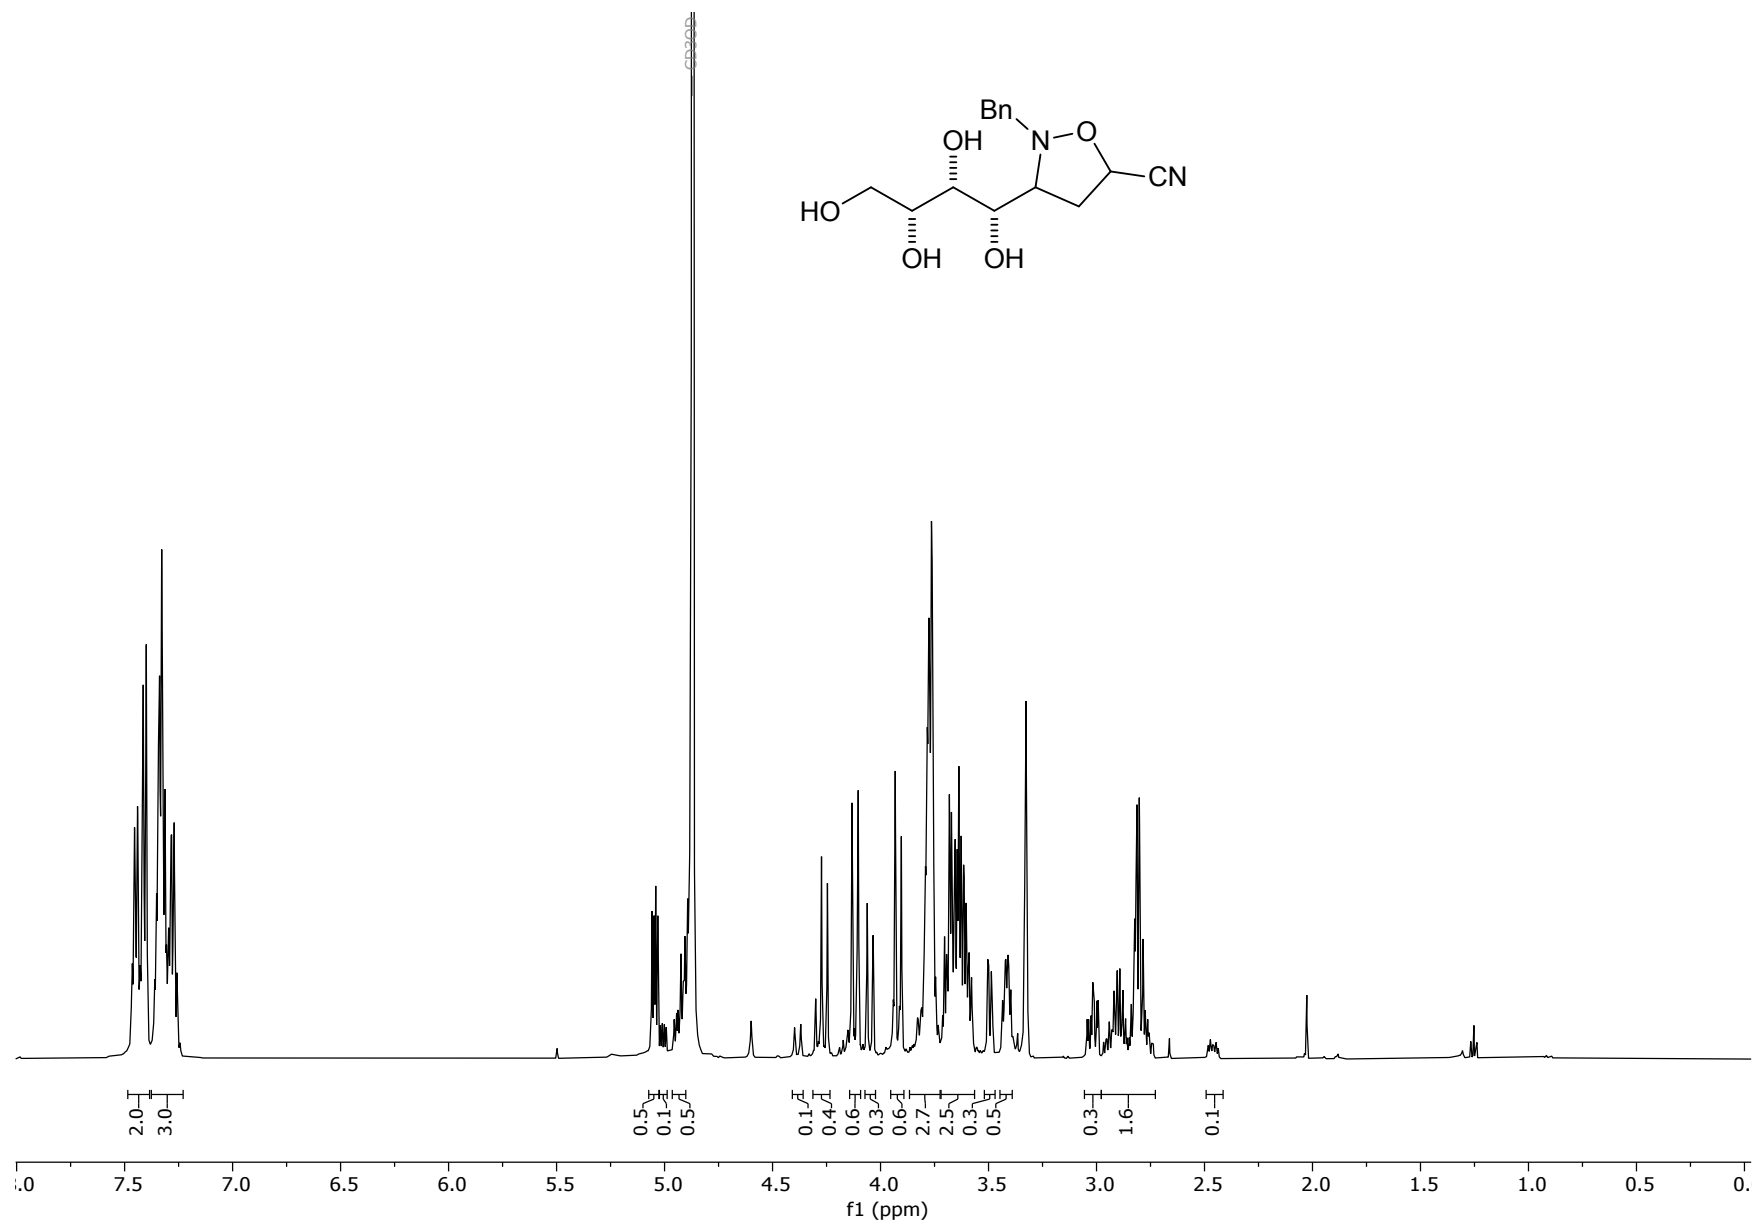

<sup>13</sup>C-NMR spectrum of 27 (CD<sub>3</sub>OD)

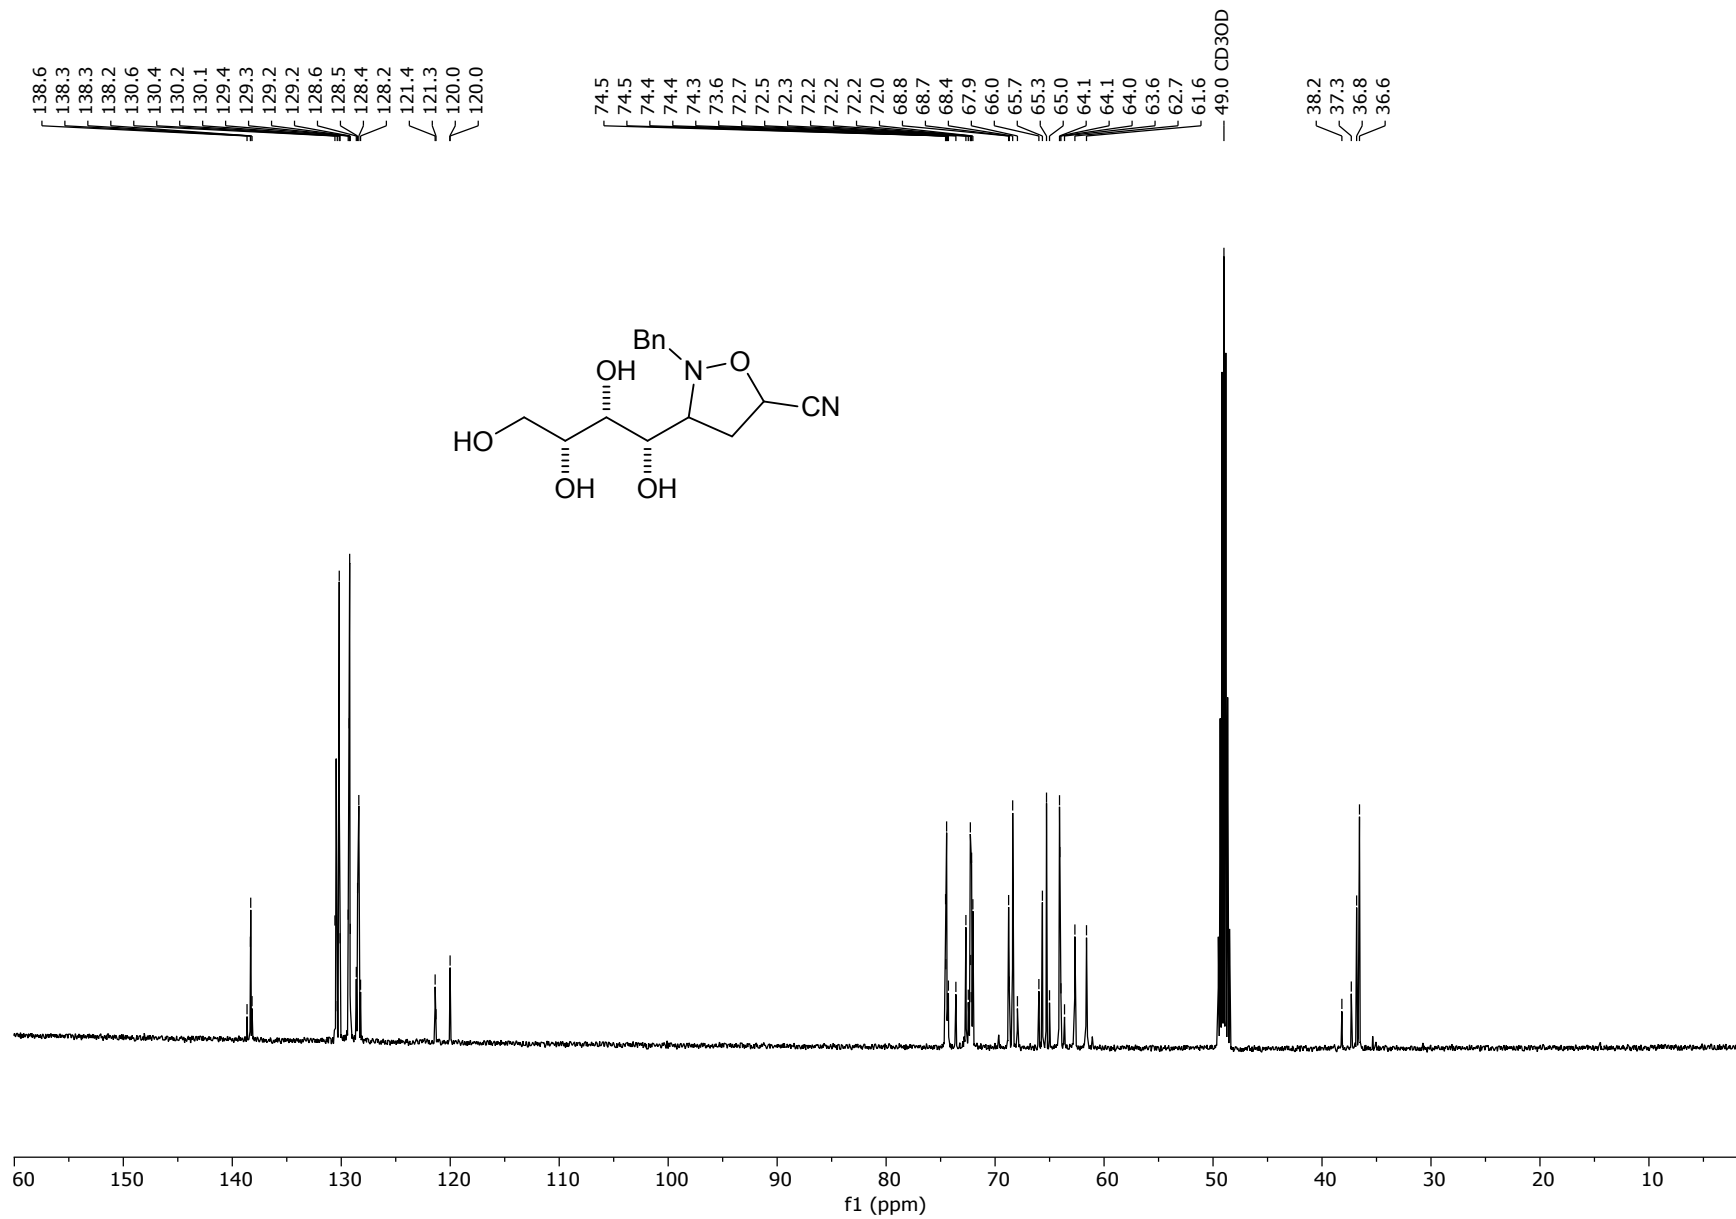

<sup>1</sup>H-NMR spectrum of 28 (CD<sub>3</sub>OD)

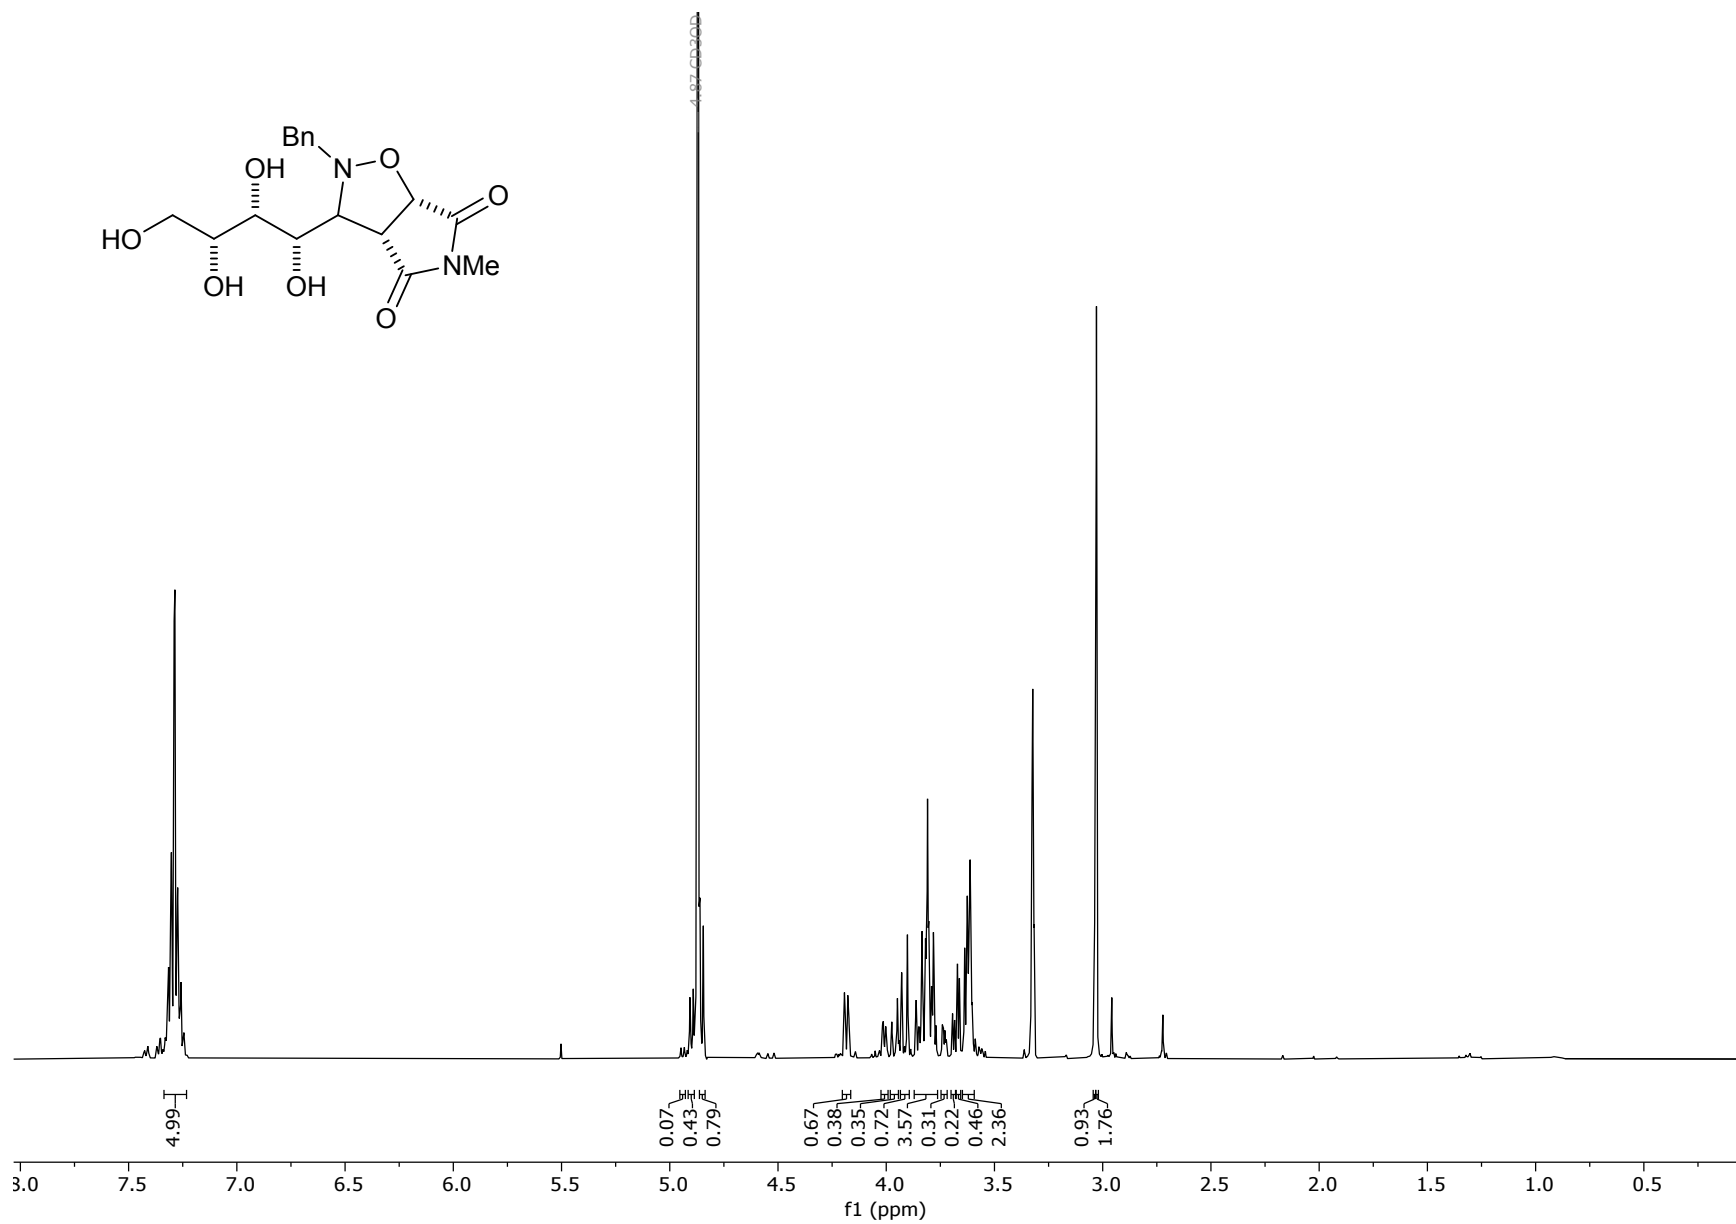

<sup>13</sup>C-NMR spectrum of 28 (CD<sub>3</sub>OD)

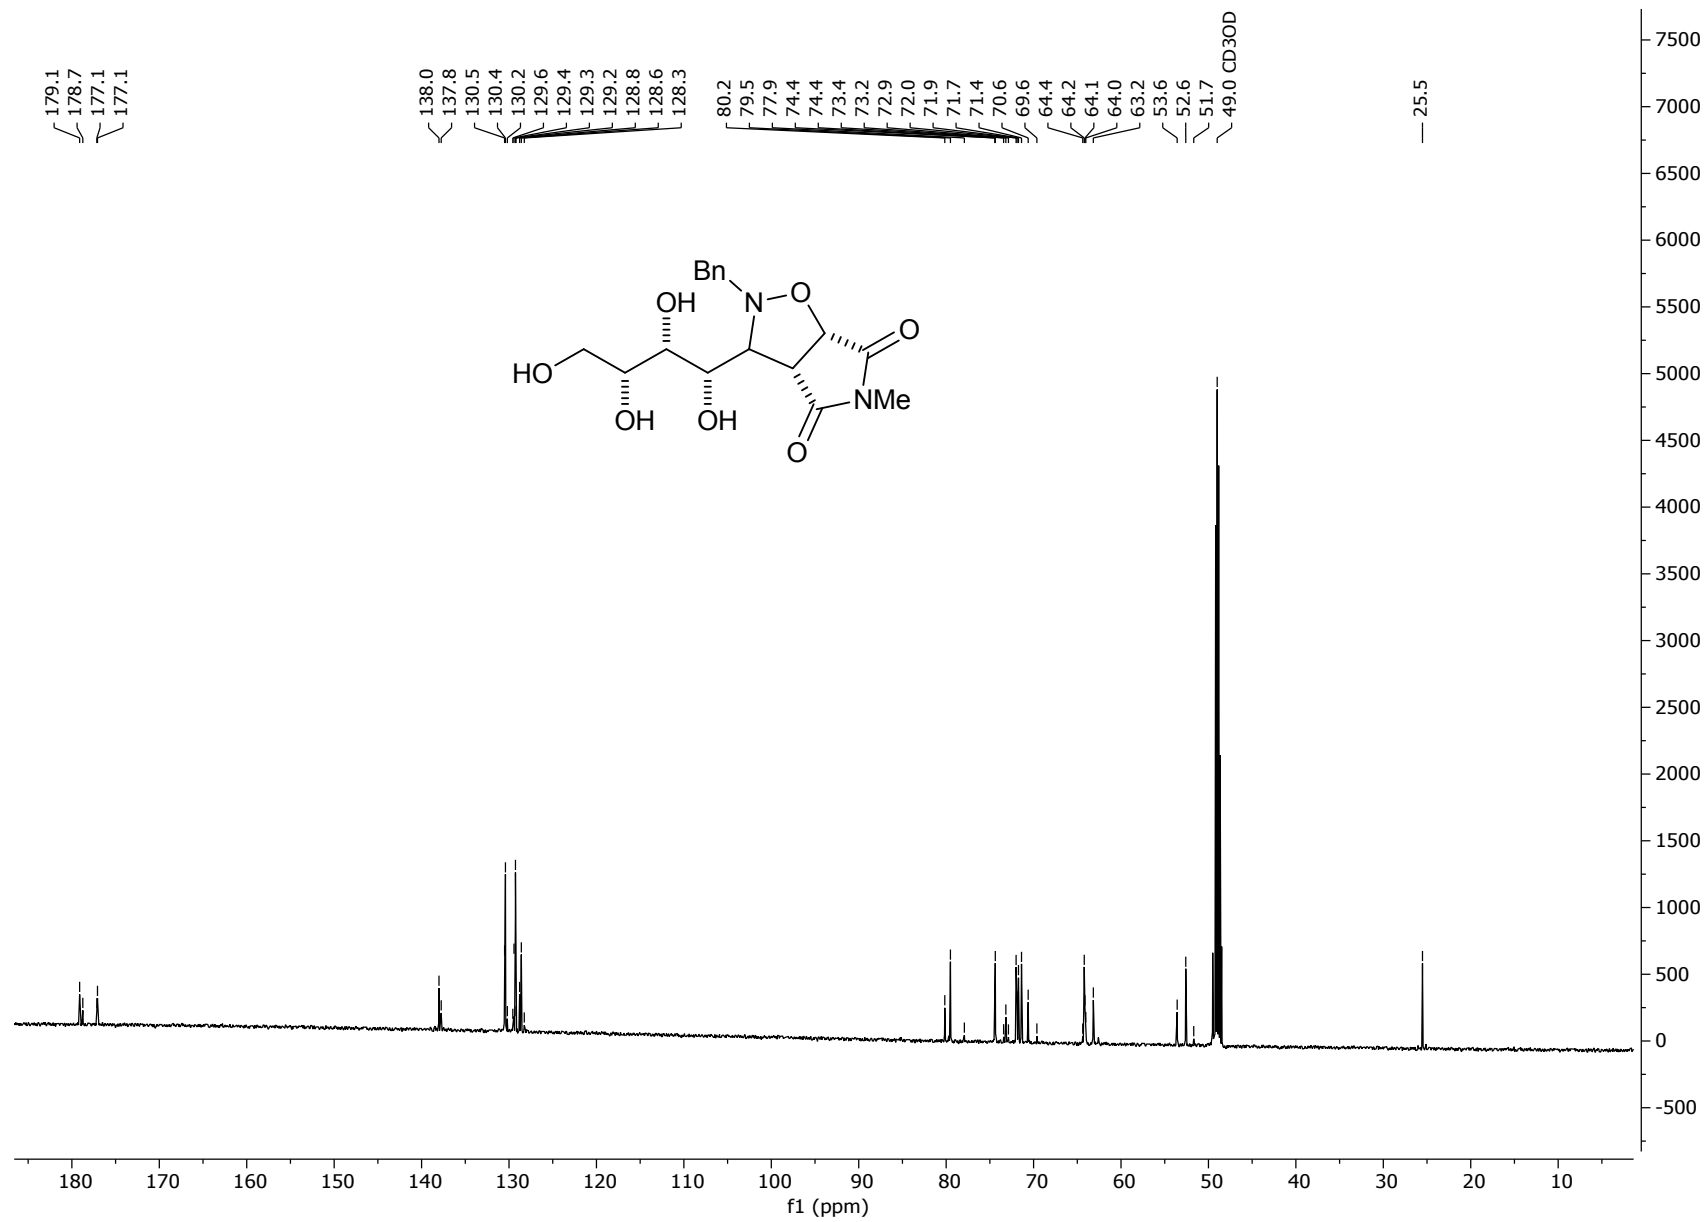

<sup>1</sup>H-NMR spectrum of 29 (CD<sub>3</sub>OD)

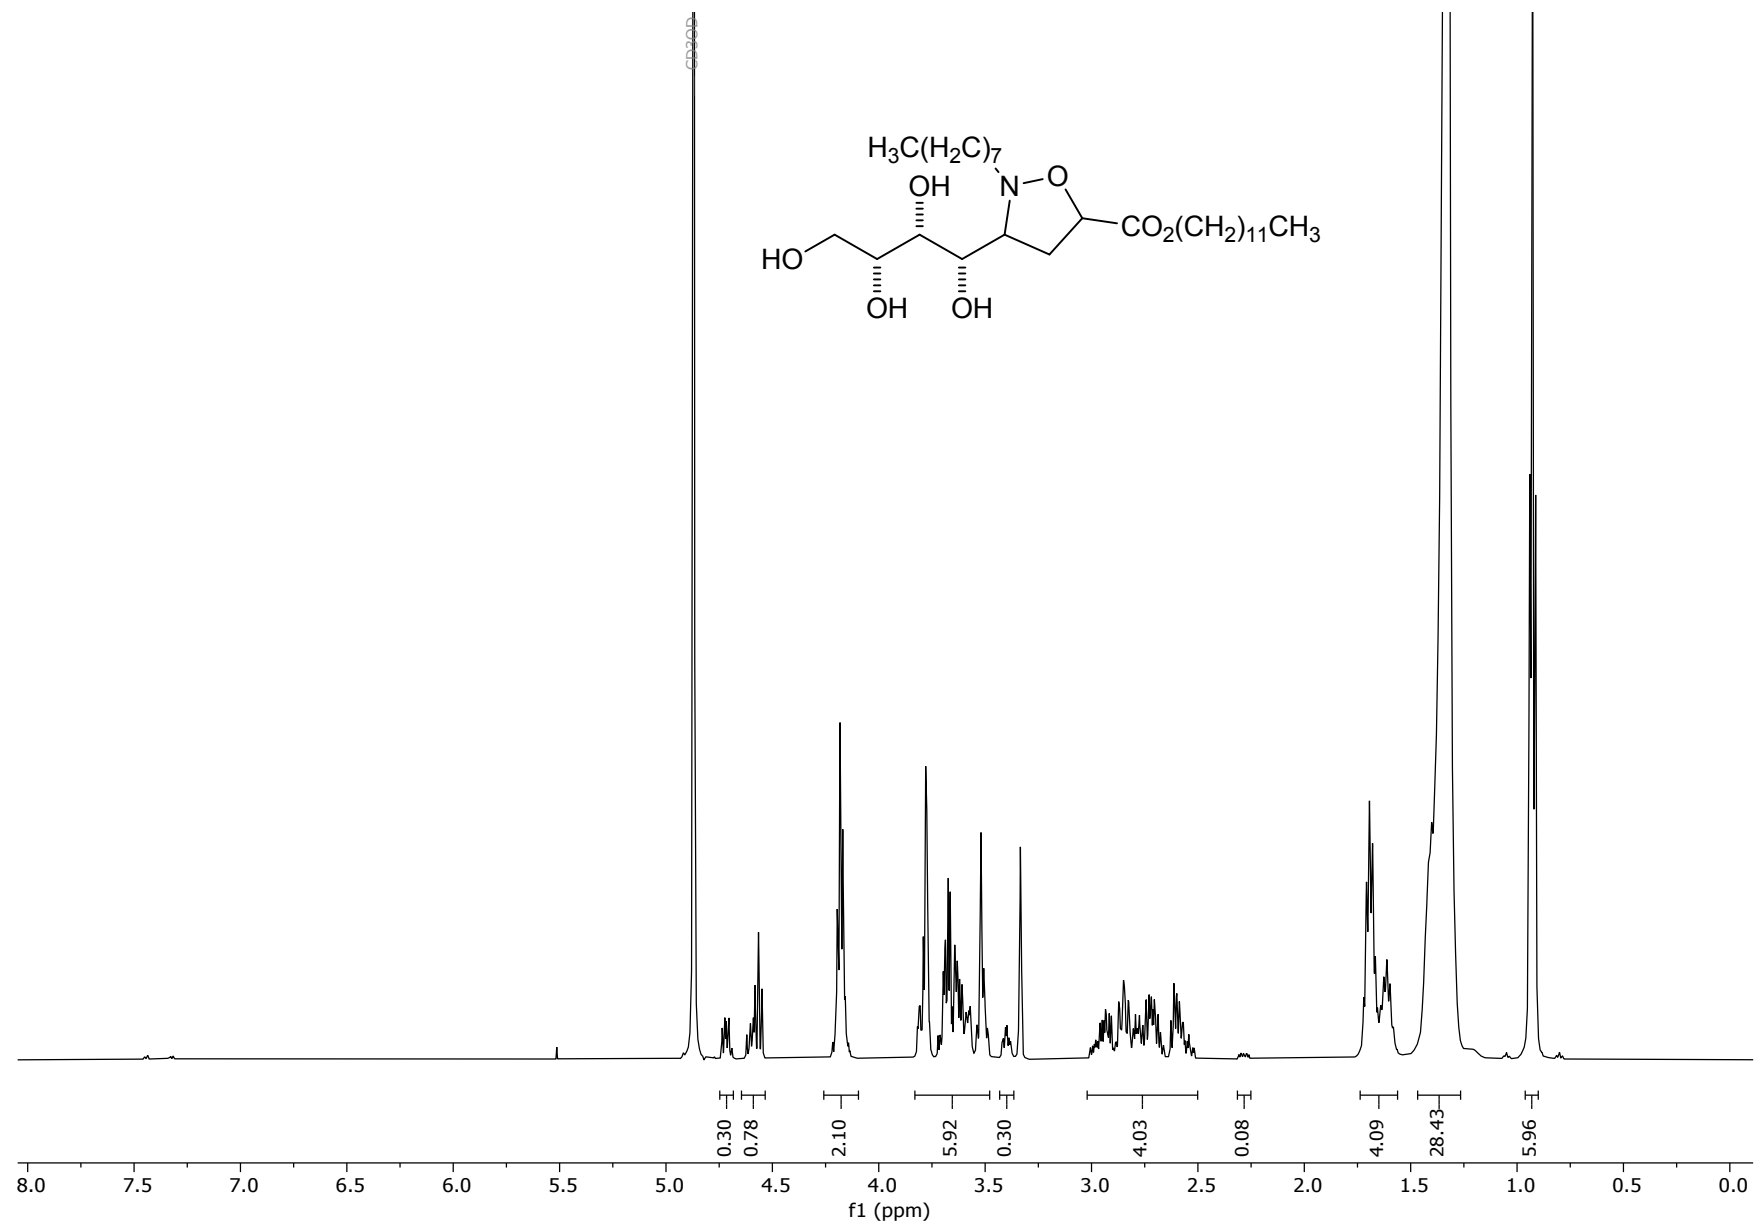

<sup>13</sup>C-NMR spectrum of 29 (CD<sub>3</sub>OD)

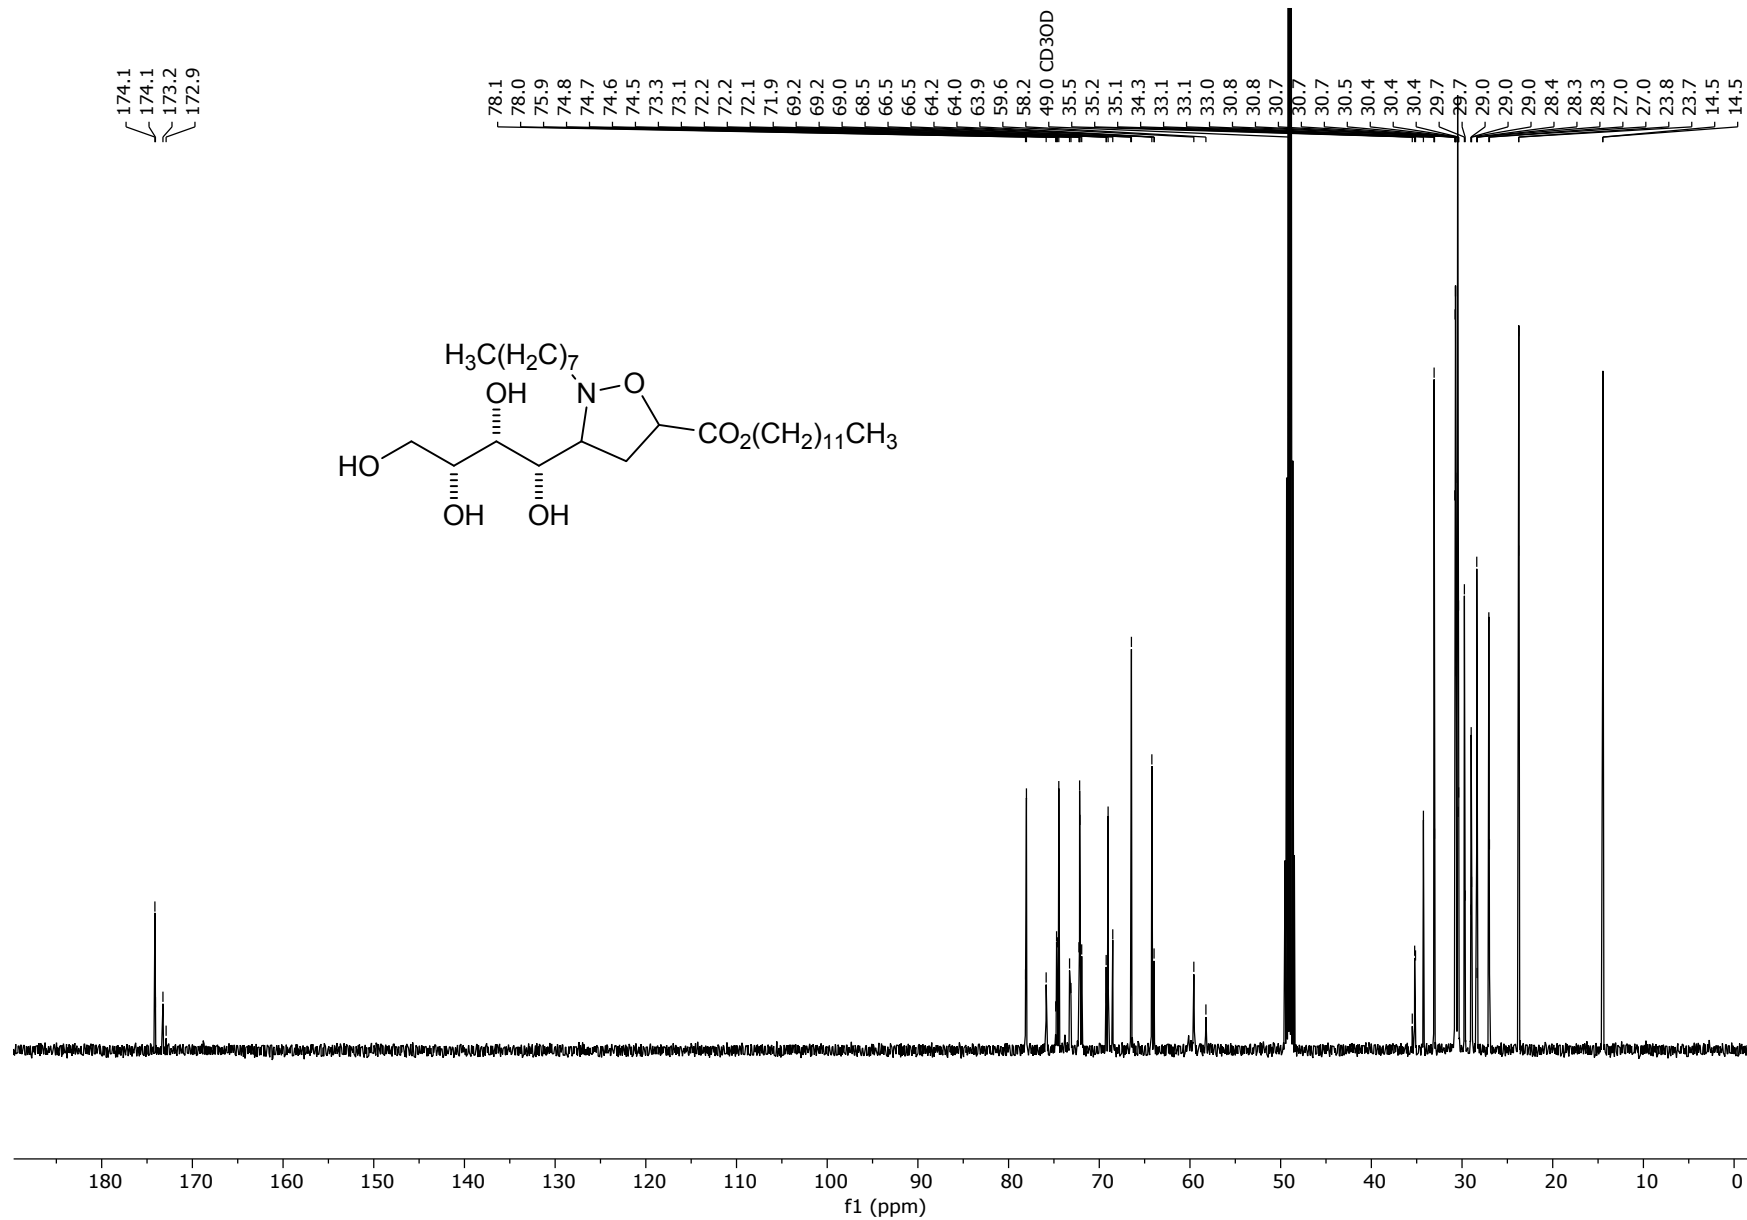



<sup>1</sup>H-NMR spectrum of 11 (CDCl<sub>3</sub>)

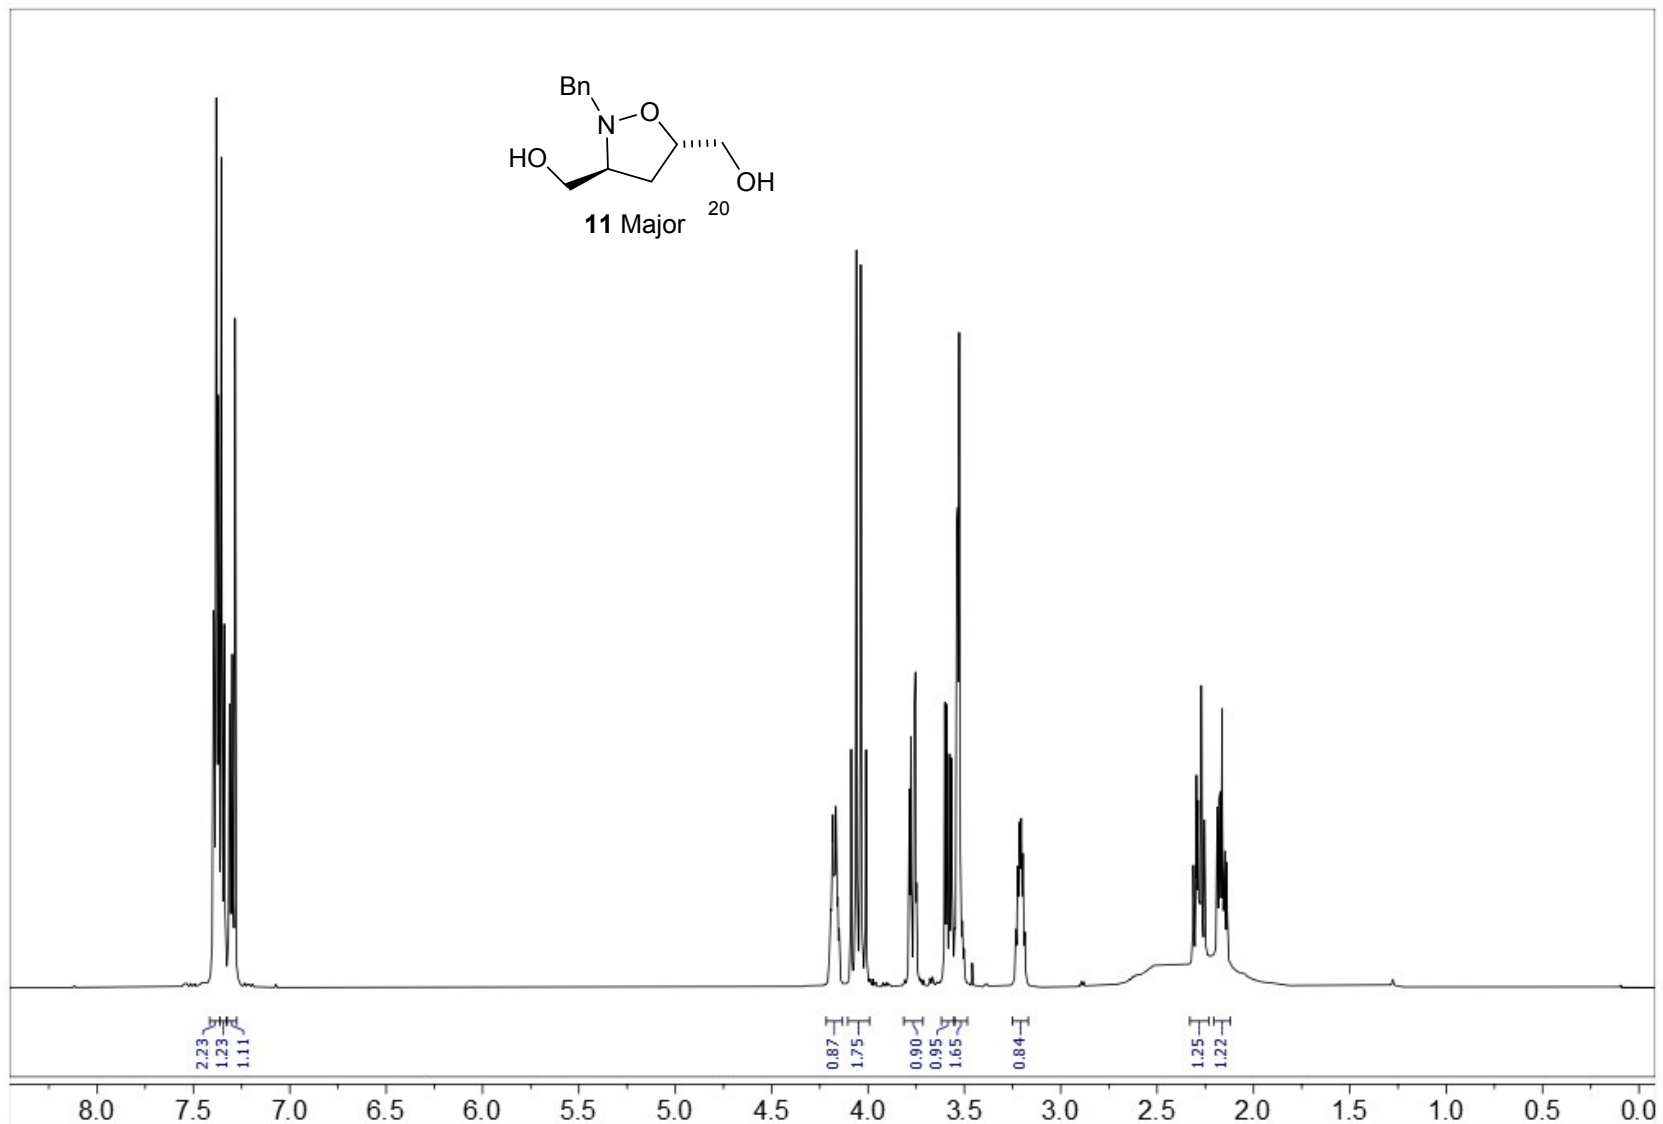

<sup>13</sup>C-NMR spectrum of 11 (CDCl<sub>3</sub>)

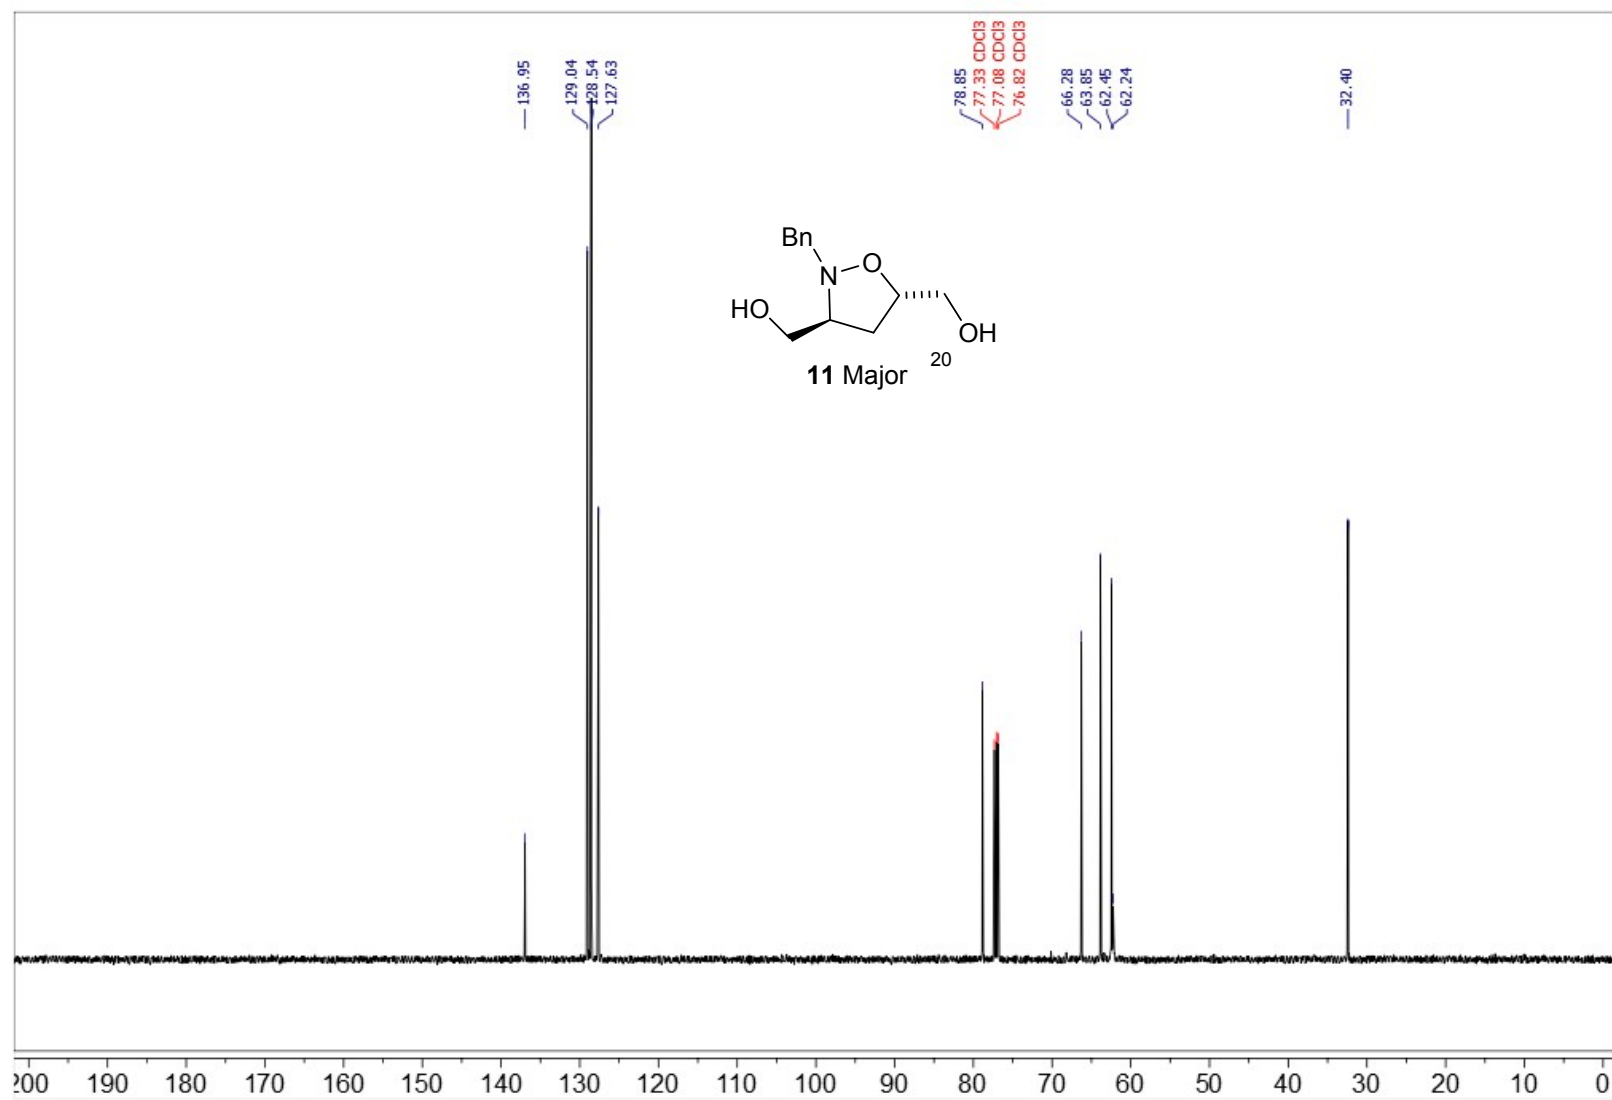

<sup>1</sup>H-NMR spectrum of 12 (CDCl<sub>3</sub>)

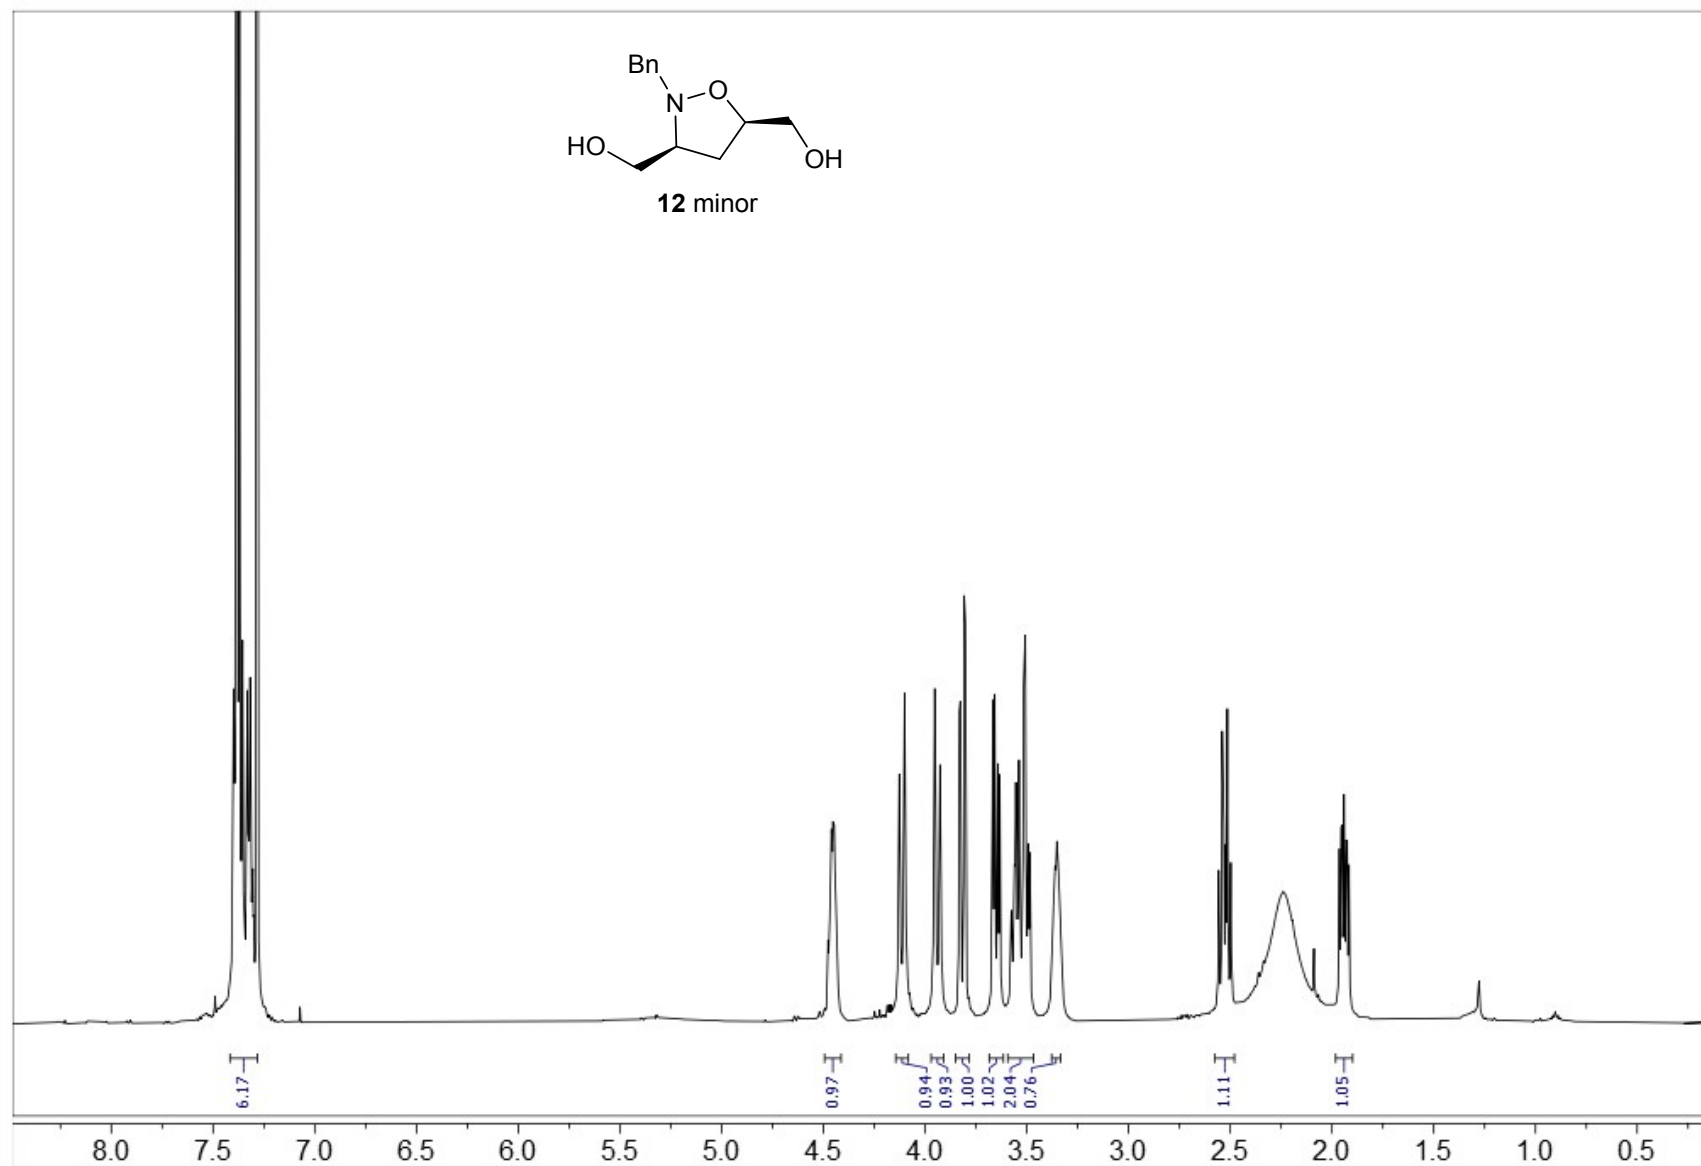

<sup>13</sup>C-NMR spectrum of 12 (CDCl<sub>3</sub>)

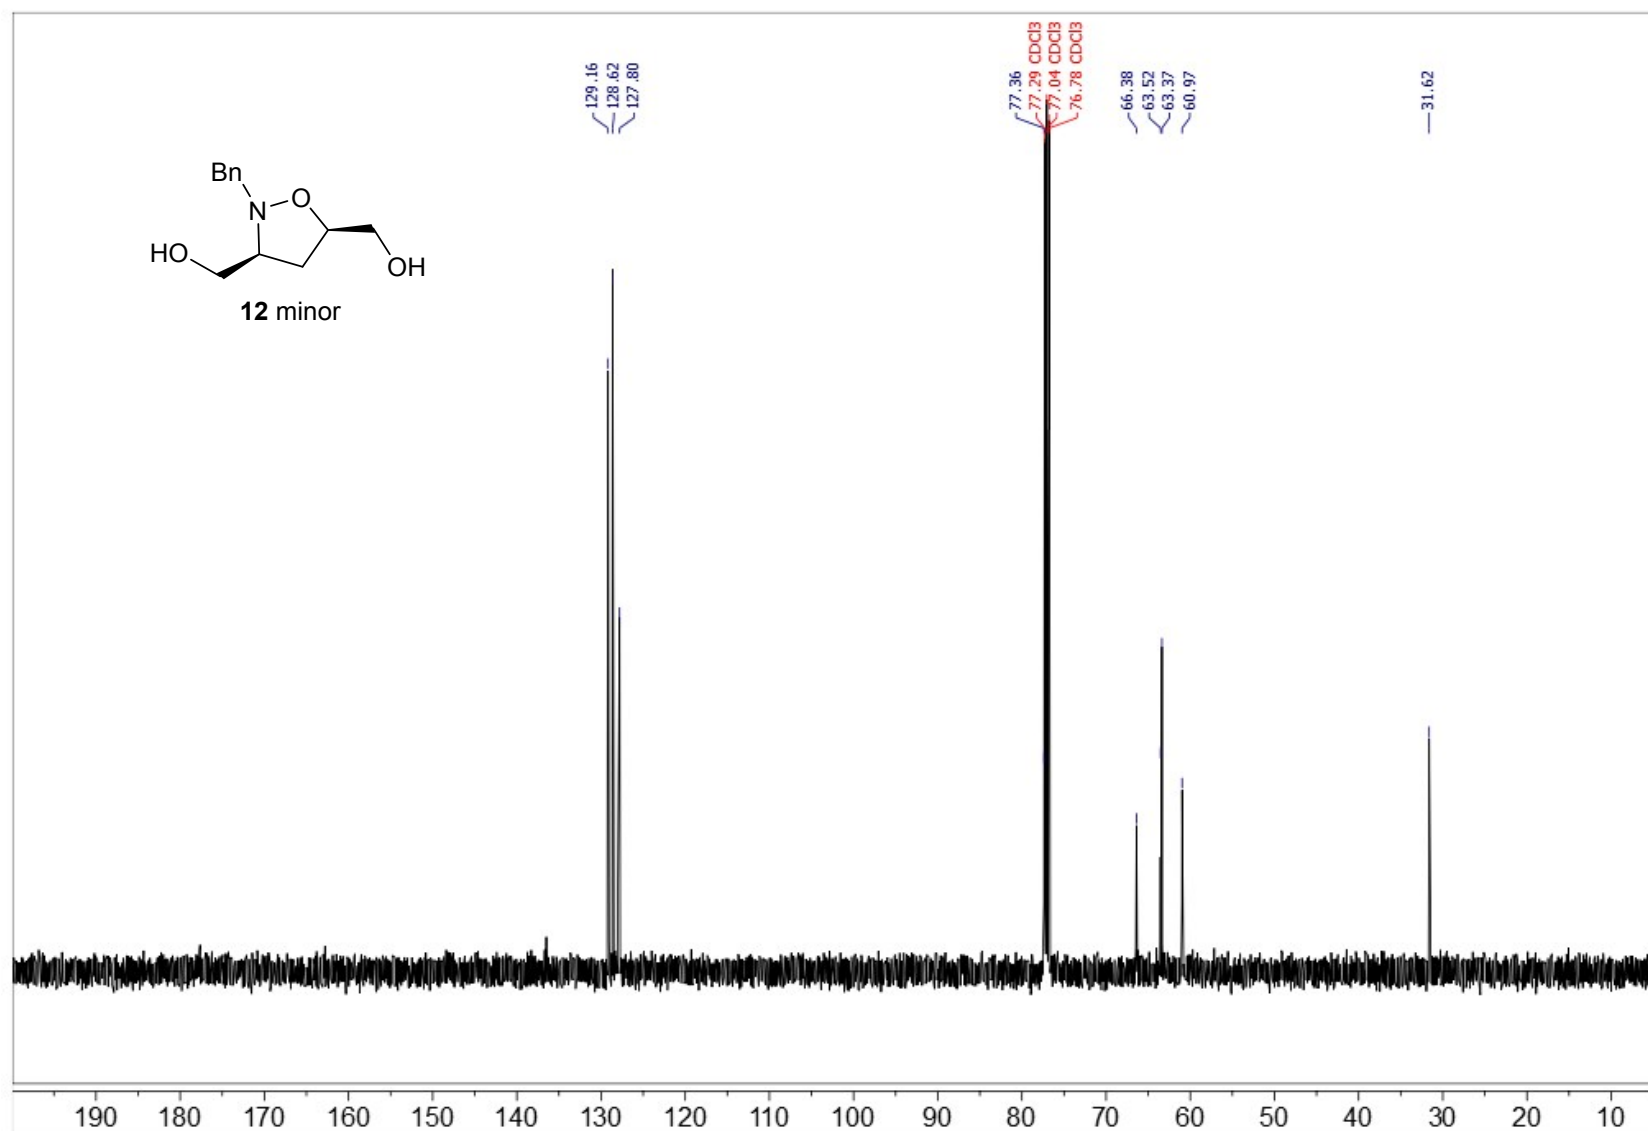

### Hydrogenation of compounds **10**, **10'** and **10''** for chemical correlation

**Procedure** : compound **10**, **10'** or **10''** (0.53 mmol) in MeOH (14 mL) and AcOH (1.6 mL) were stirred under H<sub>2</sub> atmosphere for 24 h in the presence of Pearlman's catalyst (Pd(OH)<sub>2</sub>/C, 74 mg). Filtration of the solution over a small pad of silica followed by evaporation of the solvents afforded a yellow oil, which was purified by chromatography on silical gel (CHCl<sub>3</sub>/MeOH/NH<sub>4</sub>OH, 6/4/1; R<sub>f</sub> = 0.2) to afford pyrrolidone **13** in quantitative yield.

**<sup>1</sup>H-NMR spectrum of 2-pyrrolidinones isolated after hydrogenation of 10 (4 diastereoisomers)**

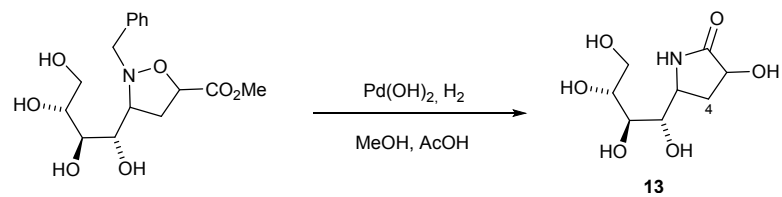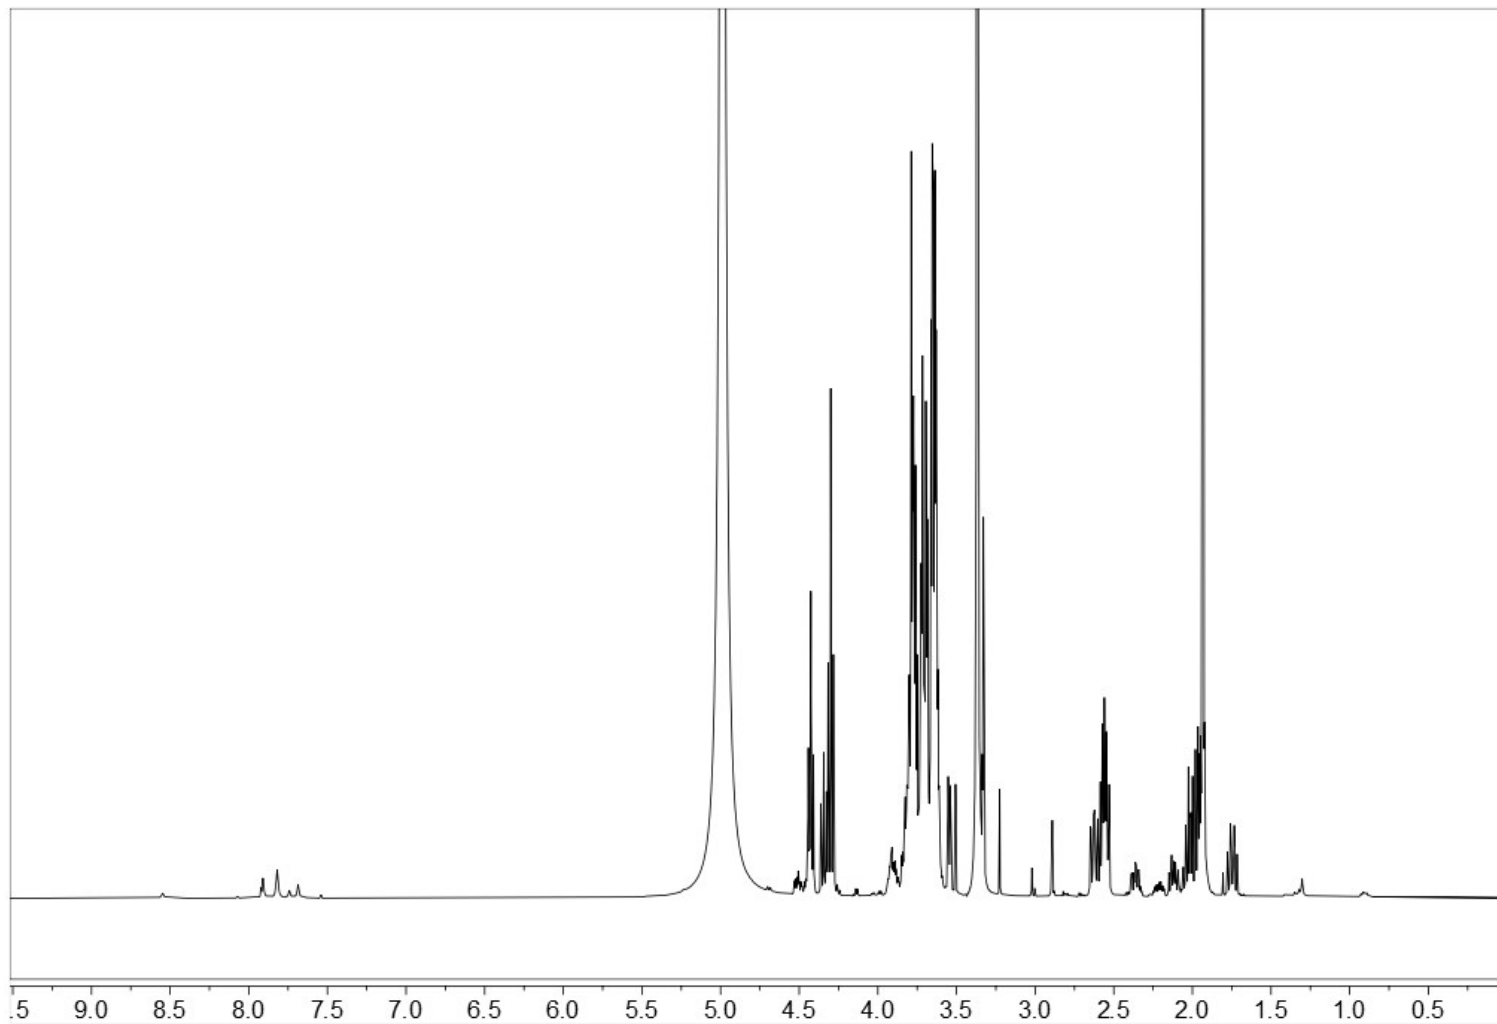

**<sup>13</sup>C-NMR spectrum of 2-pyrrolidinones isolated after hydrogenation of 10 (4 diastereoisomers) – extension shows C-4**

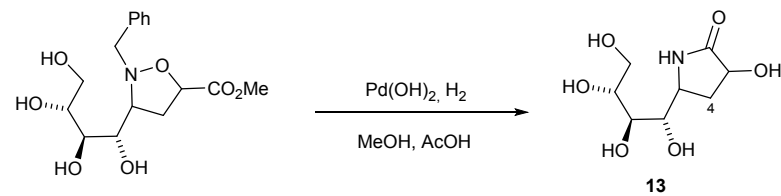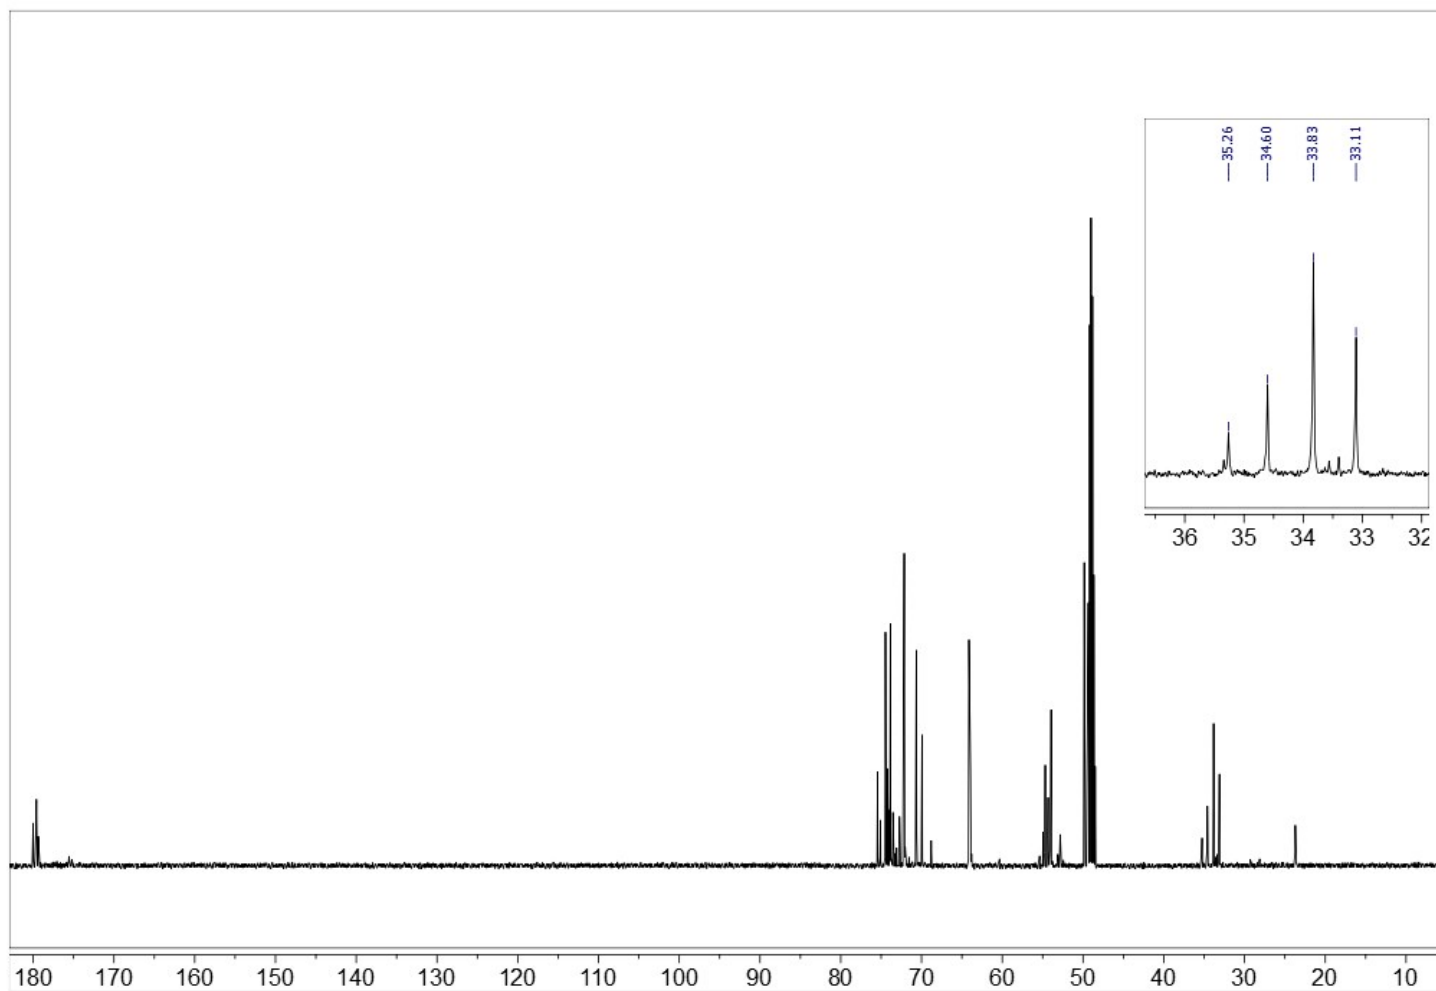

<sup>1</sup>H-NMR spectrum of 2-pyrrolidinones isolated after hydrogenation of 10' (reaction was performed on a fraction which contained the 2 major diastereoisomers)

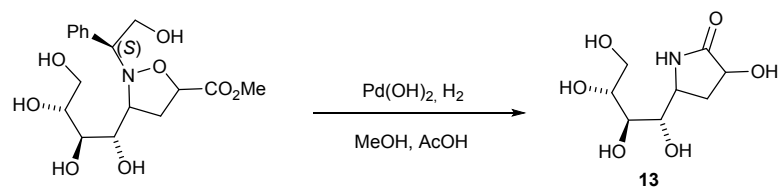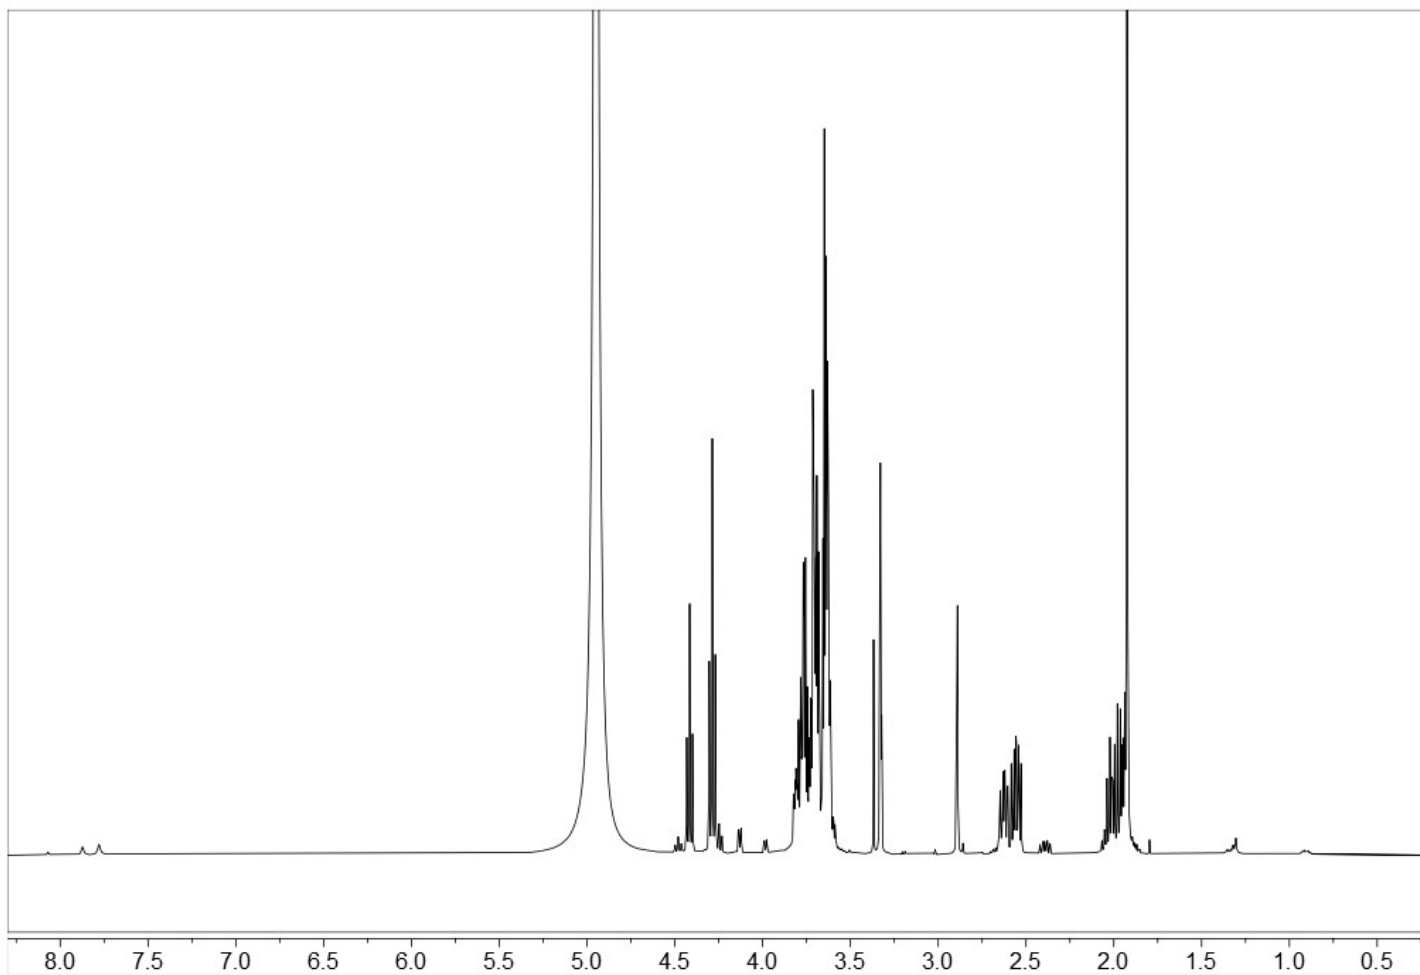



**<sup>13</sup>C-NMR spectrum of 2-pyrrolidinones isolated after hydrogenation of 10' (reaction was performed on a fraction which contained the 2 major diastereoisomers) – extension shows C-4**

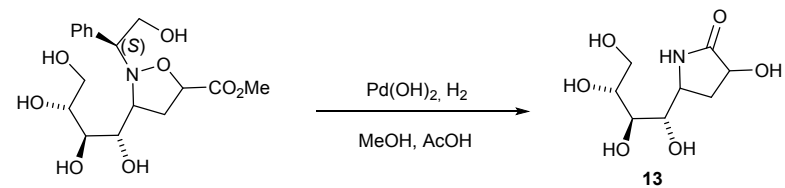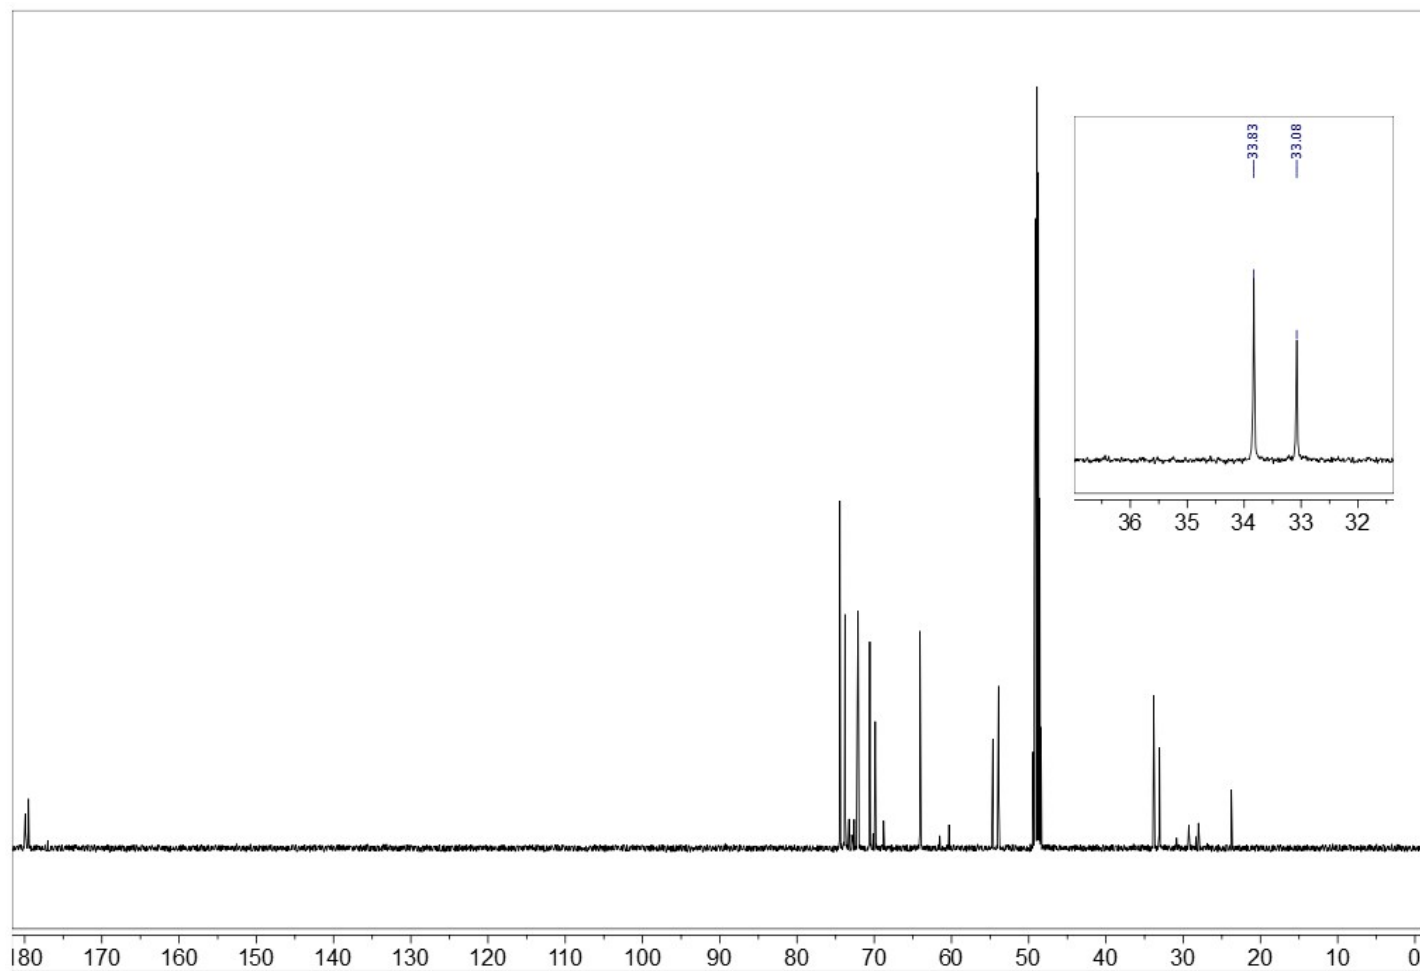

**<sup>1</sup>H-NMR spectrum of 2-pyrrolidinones isolated after hydrogenation of 10'' (4 diastereoisomers)**

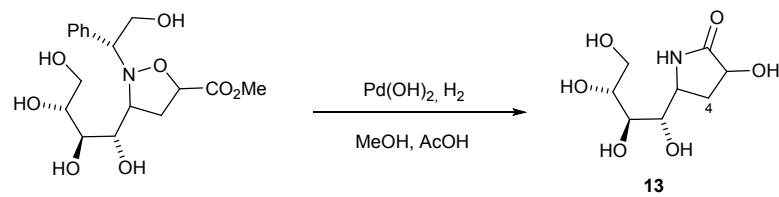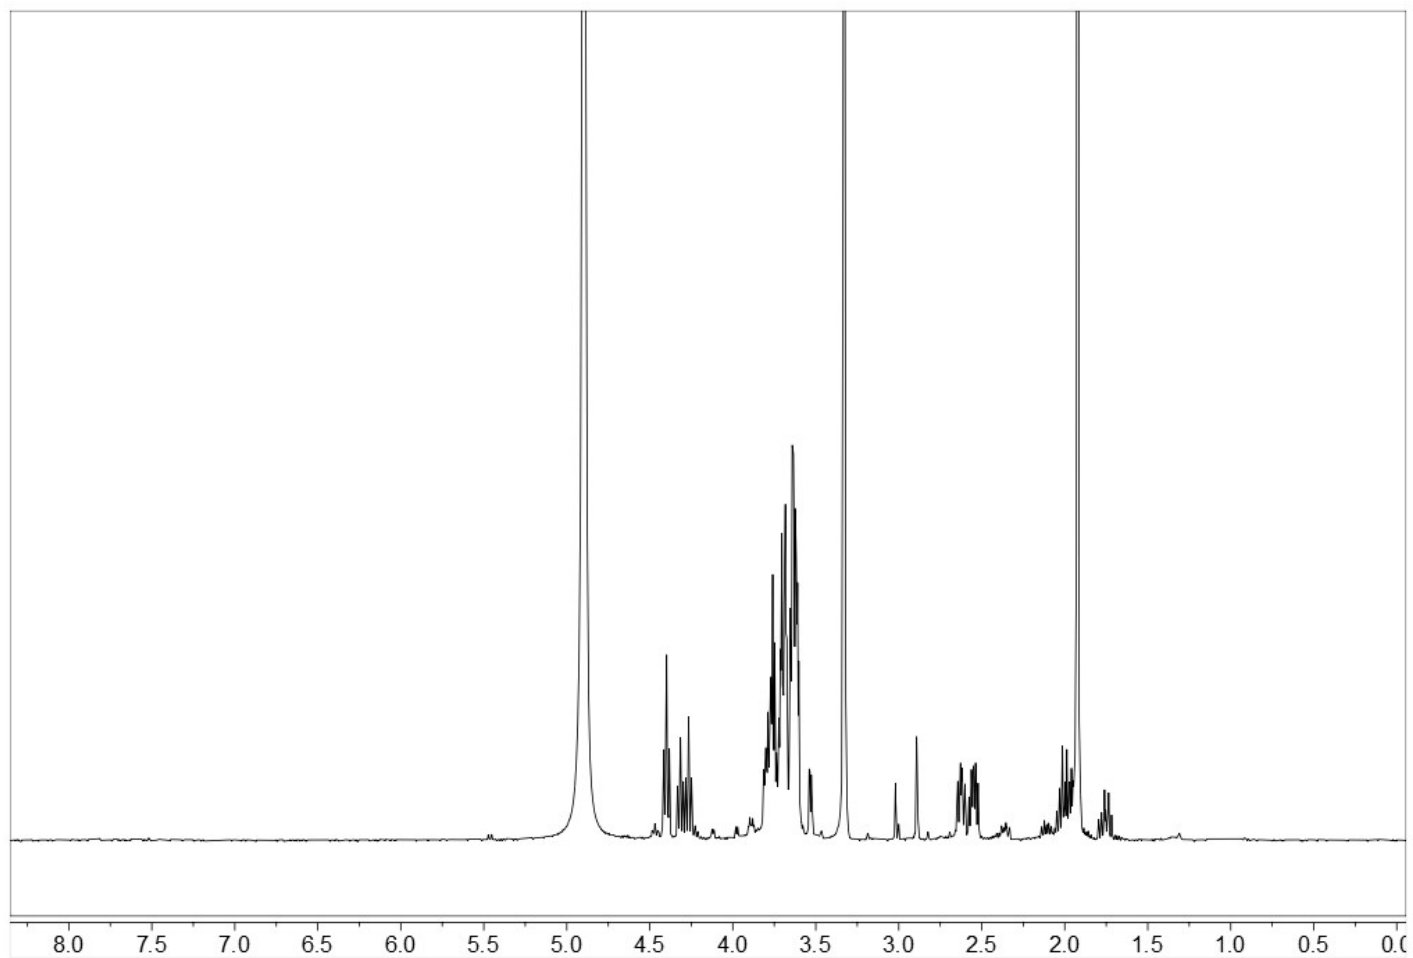

<sup>13</sup>C-NMR spectrum of 2-pyrrolidinones isolated after hydrogenation of 10'' (4 diastereoisomers) – extension shows C-4

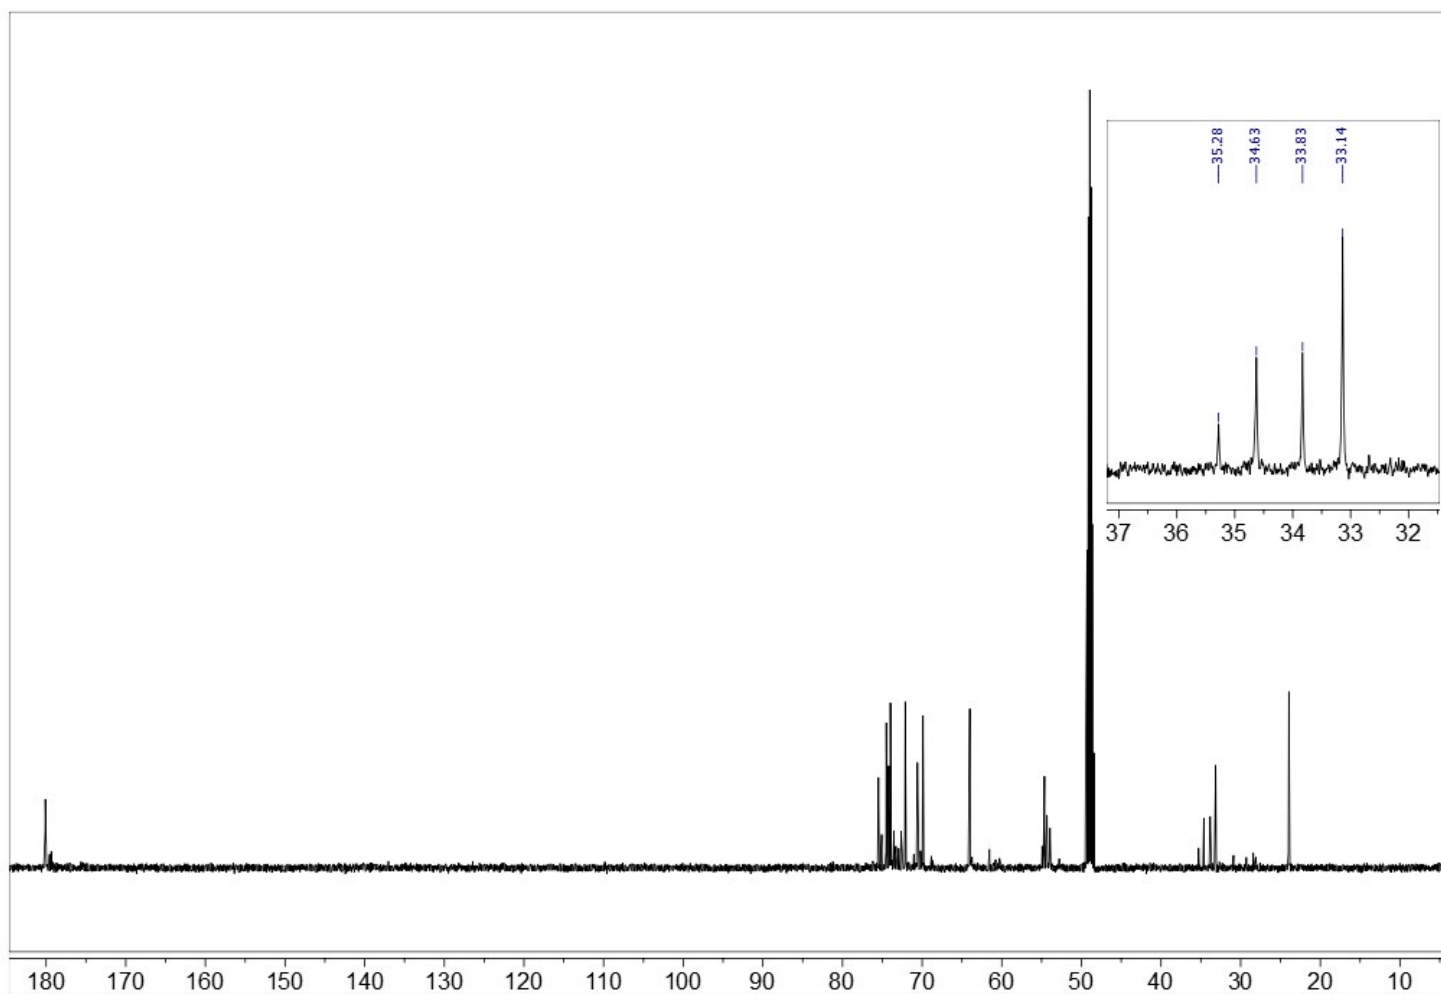

**Enzyme assay:** all enzymes were purchased from Sigma Chemical Co. In a typical experiment, the glycosidase (0.013 U/mL) was pre-incubated at 33 °C for 5 min in the presence of the **13** in 50 mM acetate buffer (pH 5.6, except for rice  $\alpha$ -glucosidase pH 5.1 and yeast  $\alpha$ -glucosidase pH 6.2). The reaction was started by addition of the appropriate substrate (*p*-nitrophenyl glycoside, 1 mM concentration) to a final volume of 250  $\mu$ l. The reaction was stopped after 10-15 min (depending on the enzyme) by addition of 300  $\mu$ L of 0.4 M Na<sub>2</sub>CO<sub>3</sub>. The released *p*-nitrophenolate was quantified spectrophotometrically at 415 nm with a microplate reader (300  $\mu$ L of the reaction mixture in a well, OD *ca* 0.7 for the control, without inhibitor). All the assays were done in duplicate (less than 10% variability in each case). Absorbance was corrected by subtracting the blank. The blank was measured in an additional experiment, conducted in the absence of enzyme. The control experiment contained no inhibitor.

Percentage of inhibition was calculated as follows:

$$\%I = \left( 1 - \frac{A_{\text{sample}}}{A_{\text{control}}} \right) * 100$$
